# Supplementary material for: LPS-aggregating proteins GBP1 and GBP2 are each sufficient to enhance caspase-4 activation both in cellulo and in vitro
Source: PubMed Central journal article supplement — Proc Natl Acad Sci U S A. 2023 Apr 6;120(15):e2216028120. doi: 10.1073/pnas.2216028120 (PMC10104521; doi:10.1073/pnas.2216028120), 2023-04-06
Supplement: pnas.2216028120.sapp.pdf [file pnas.2216028120.sapp.pdf]

## Supporting Information for

LPS-aggregating proteins GBP1 and GBP2 are each sufficient to enhance caspase-4 activation both *in cellulo* and *in vitro*

Mary S. Dickinson,<sup>#,1</sup> Miriam Kutsch,<sup>#,1</sup> Linda Sistemich,<sup>2</sup> Dulcemaria Hernandez,<sup>1</sup> Anthony S. Piro,<sup>1</sup> David Needham,<sup>3</sup> Cammie F. Lesser,<sup>4,5</sup> Christian Herrmann,<sup>2</sup> Jörn Coers<sup>\*,1,6</sup>

<sup>#</sup>authors contributed equally

<sup>1</sup>Department of Molecular Genetics and Microbiology, Duke University Medical Center, Durham, NC, USA

<sup>2</sup>Department of Physical Chemistry I, Ruhr-University Bochum, Bochum, Germany

<sup>3</sup>Department of Mechanical Engineering and Material Science, Duke University, Durham, North Carolina, 27708, USA

<sup>4</sup>Center for Bacterial Pathogenesis, Division of Infectious Diseases, Massachusetts General Hospital, Boston, Massachusetts, USA

<sup>5</sup>Department of Microbiology, Blavatnik Institute, Harvard Medical School, Boston, Massachusetts, USA

<sup>6</sup>Department of Immunology, Duke University Medical Center, Durham, NC, USA

\* corresponding author: Jörn Coers

Email: [jorn.coers@duke.edu](mailto:jorn.coers@duke.edu)

### This PDF file includes:

- Detailed materials and methods
- Figures S1 to S10
- Legends for Movies S1 to S3
- Plasmid sequences
- SI References

### Other supporting materials for this manuscript include the following:

- Movies S1 to S3

## Detailed materials and methods

### Cell lines and cell culture

HeLa and A549 cells (ATCC) were grown in DMEM (Gibco 11995-065) supplemented with 9% heat inactivated FBS (Omega Scientific) and non-essential amino acids (Gibco 11140-050). Cells were grown at 37°C in 5% CO<sub>2</sub>. Cell lines were routinely tested for mycoplasma contamination. Cell lines were authenticated using GenePrint 10 (Promega) performed by the Duke University DNA Analysis Facility.

### Knockout cells

For A549 GBP1<sup>KO</sup>, GBP2<sup>KO</sup> and GBP4<sup>KO</sup> cells, single guide RNAs (sgRNAs) sequences to human GBPs were selected using the optimized CRISPR design site [crispr.mit.edu](http://crispr.mit.edu). The GBP1 sgRNA sequence was CATTACACAGCCTATGGTGG and the GBP2 sgRNA sequence was CTAGTTCTGCTCGACTGA. For GBP4 the sgRNA sequences were ATTGTAGGGCTATACCGCACAGG and TATCTCATGAATCGTCTTGCAGG. sgRNAs were cloned into PX459 containing Puromycin resistance ((1); pSpCas9(BB)-2APuro (PX459) was a gift from Feng Zhang (Addgene plasmid #48139) or PX458 containing an eGFP cassette ((1); pSpCas9(BB)-2A-GFP (PX458) was a gift from Feng Zhang (Addgene plasmid #48138) following the Zhang lab, Addgene CRISPR Genome Engineering Toolbox ([www.addgene.org/crispr/zhang/](http://www.addgene.org/crispr/zhang/)). A549 cells were transfected with PX459 or PX458 plasmids containing guide RNAs using FuGENE HD transfection reagent (Promega E2311) following manufacturers guidelines. 48 hours post transfection, PX459 transfected cells were put under Puromycin (Generon 1860-25) selection at 1-2 µg/ml for 48 hours and PX458 transfected cells were sorted one cell per well into a 48 well plate using a FACS Aria Fusion Cell Sorter.

A549 GBP3<sup>KO</sup>, GBP5<sup>KO</sup>, and HeLa GBP2<sup>KO</sup>, GBP3<sup>KO</sup>, GBP4<sup>KO</sup>, and GBP5<sup>KO</sup> cells were generated by the Duke Functional Genomics core as previously described (2). sgRNAs were designed using CHOPCHOP (3) and Cas-OFFinder (4), then cloned into PX459 V2 (Addgene #62988; (1)). For A549 GBP3<sup>KO</sup> cells the sgRNA sequences were TCGATCTGCCCATTCACCGC and AGAACTCCGGATACAGAGT. For A549 GBP4<sup>KO</sup> cells the sgRNA sequences were ATTGTAGGGCTATACCGCACAGG and TATCTCATGAATCGTCTTGCAGG. For A549 GBP5<sup>KO</sup> cells the sgRNA sequences were GCTCATTAAGTTCTCGATG and GCAAAGTAACATCCTAGACA. For HeLa GBP2<sup>KO</sup> cells the sgRNA sequences were AGAGCTGACAGATCGAATCA and TCGTCTACAGAATTGTTACC. For HeLa GBP3<sup>KO</sup> cells the sgRNA sequence was CCTCATTGAGAACACTAATG. For HeLa GBP4<sup>KO</sup> cells the sgRNA sequences were CGTCTTGCAGGAAAGCGCAA and ATTGTAGGGCTATACCGCAC. For HeLa GBP5<sup>KO</sup> cells the sgRNA sequences were GCTCATTAAGTTCTCGATG and GCAAAGTAACATCCTAGACA. A549 cells were transfected with sgRNAs using Lipofectamine 3000 (ThermoFisher Scientific) according to manufacturer's instructions. 24 hours after transfection, cells were selected with 2 mg/mL puromycin (Sigma) for three days. Cells were diluted to isolate single cells, which were expanded to generate clonal cell lines. Knockouts were validated by western blot or sanger sequencing.

To generate CRISPR Cas-9 mediated knockout of *GBP1* in HeLa cells, we chose an sgRNA sequence targeting exon 2 that would minimize off-target editing of the closely related *GBP3* gene, CATTACACAGCCTATGGTGG. The sgRNA was ordered as modified synthetic sgRNA from Synthego and delivered to HeLa cells by electroporating 200,000 cells with 4 µg TrueCut Cas9 protein (ThermoFisher Scientific) complexed with 180 pmol *GBP1* sgRNA using a Neon system (ThermoFisher Scientific) with the following settings: 1005 V, 35 ms, 2 pulses. Following electroporation, cells were recovered in 6 well dishes for three days before harvesting to check KO efficiency. Cells were diluted to isolate single cells, then expanded to generate a clonal knockout line.

## Bacterial strains

*Shigella flexneri* strain 2457T was used. *S. flexneri*  $\Delta$ ipaH9.8, *S. flexneri*  $\Delta$ ospC3, and *S. flexneri*  $\Delta$ ipaH9.8 $\Delta$ ospC3 knockouts were made as previously described (5-7). *S. flexneri* was cultured on tryptic soy broth (TSB, Millipore Sigma) agar plates containing 0.01% Congo Red (Millipore Sigma), then grown in liquid culture in TSB. *Salmonella enterica* Typhimurium strain 14028s was used throughout. *S. Typhimurium* was cultured on lysogeny broth (LB), Miller formulation agar plates, or in liquid LB.

## Infections

For *S. flexneri* infections, *S. flexneri* was streaked on an agar plate, then single colonies were picked and grown overnight at 37°C shaking, in 3 ml TSB. The next day 250  $\mu$ l overnight culture was diluted into 5 ml TSB and grown for approximately 1 hour 45 minutes, until OD600 was between 0.7 and 1. 1 ml bacterial culture was pelleted and resuspended in 1 ml infection media (phenol red free DMEM (Gibco 31053-028), supplemented with 5% FBS and non-essential amino acids). Bacteria was further diluted in infection media to have enough bacteria for a multiplicity of infection (MOI) of 5 in 100  $\mu$ l per well of 96 well plate, or 1 ml per well of 24 well plate. Media was aspirated from cells and diluted *S. flexneri* was added to each well. Plate was centrifuged for 10 min, 800 $\times$ g, at room temperature. The end of the centrifugation was considered the start of infection, and plates were then put in 37°C incubator with 5% CO<sub>2</sub>. After 30 minutes, cells in 96 well plate were washed once with 200  $\mu$ l warm HBSS. For microscopy, cells in 24 well plate were washed twice with 1ml warm HBSS. After washing, infection medium containing 50  $\mu$ g/ml gentamicin was added to wells to kill extracellular bacteria. For *S. Typhimurium* infections, single colonies were grown overnight at 37°C shaking, in 1.5 ml LB. Next day 45  $\mu$ l overnight culture was diluted into 1.5 ml LB and grown for 2 hours 40 minutes. Bacterial culture was pelleted and resuspended in infection media (described above for *S. flexneri* infections). Bacteria was further diluted in infection media to have enough bacteria for a multiplicity of infection (MOI) of 200 in 100  $\mu$ l per well of 96 well plate. Media was aspirated from cells and diluted *S. Typhimurium* was added to each well. Plate was centrifuged for 10 min, 800 $\times$ g, at room temperature. The end of the centrifugation was considered the start of infection, and plates were then put in 37°C incubator with 5% CO<sub>2</sub>. After 30 minutes, cells in 96 well plate were washed once with 200  $\mu$ l warm HBSS. After washing, infection medium containing 50  $\mu$ g/ml gentamicin was added to wells to kill extracellular bacteria.

## Cell death assays, bacterial luminescence and IL-18 ELISA

Cells were plated in 96 well plate with white sides (Corning 3610). *S. flexneri* or *S. Typhimurium* infections were performed as described above, sytox green (Invitrogen) was added at the same time as gentamicin at a final concentration of 1.5-3 nM in 200  $\mu$ l per well of 96 well plate. For lysed control wells, 1% triton X-100 was added to media containing sytox green and gentamicin. Sytox green fluorescence and bacterial luminescence (*S. flexneri* only) was measured every 30 minutes starting at 1 hpi. Fluorescence and luminescence were measured using Enspire 2300 multilabel plate reader (Perkin Elmer). At 3 hpi, 100  $\mu$ l supernatant was removed from each well, 30  $\mu$ l was used for LDH assay and the rest was frozen at -80°C until running IL-18 ELISA.

LDH was measured by CytoTox-ONE homogenous membrane integrity assay (Promega). Briefly, 30  $\mu$ l supernatant was mixed with 30  $\mu$ l CytoTox-ONE reagent, incubated for 7 minutes at room temperature, then measured on Enspire 2300 plate reader. IL-18 was measured using IL-18 ELISA matched antibody pair (Thermo Fisher BMS267-2MST) following manufacturer's instructions.

## Western blot

Cells were plated in a 12 well plate and primed with IFN $\gamma$  overnight (if applicable). Next day, cells were washed twice with cold PBS, then lysed in 90  $\mu$ l RIPA buffer (Millipore Sigma) containing protease inhibitors (Millipore Sigma P8340) on ice for 30 minutes. Lysates were clarified through centrifugation at 20,000 $\times$ g for 10 minutes at 4°C. Clarified lysate was mixed with Laemmli sample buffer (BioRad) containing beta-mercaptoethanol and boiled for 5 minutes. Samples were run on 4-20% mini-PROTEAN TGX Stain-free gel (BioRad) with all blue protein standards (BioRad) as a ladder. Running buffer contained 25 mM Tris base, 190 mM glycine, 0.1% SDS. Gel was transferred to PVDF using BioRad Trans-blot turbo. Following transfer, membrane was dried then incubated with primary antibody in Tris-buffered saline containing 0.1% tween 20 (TBST) and 5% non-fat milk. Blots were incubated in primary antibody either 1 hour at room temperature, or overnight at 4°C. Following primary antibody, blots were washed three times in TBST, then incubated with secondary antibody in 5% milk in TBST for 45-60 minutes. Blots were then washed five times in TBST then incubated with Clarity ECL substrate (BioRad) or SuperSignal West Femto ECL substrate (Thermo Fisher). Blots were imaged using an Azure 500 imaging system. Primary antibodies were used at the following concentrations: GBP1 (Abcam ab131255, 1:5000), GBP2 (Santa Cruz sc271568, 1:200), GBP4 (Proteintech 17746-1-AP, 1:10,000), GBP5 (Cell Signaling 67798, 1:5,000), GAPDH (Abcam ab9485, 1:10,000), mCherry (Abcam ab183628, 1:10,000), CASP4 (MBL M029-3, 1:1000), GSDMD (Sigma G7422, 1:1000). Secondary antibodies: goat anti-rabbit HRP (BioRad 1706515 or Invitrogen 65-6120, 1:5,000), anti-mouse HRP (Santa Cruz sc-525409, 1:5,000).

## Immunofluorescence microscopy

Cells were plated on glass coverslips in 24 well plates and primed overnight with IFN $\gamma$ . The next day cells were infected with *Shigella* at an MOI of 5. At the indicated time points after infection, media was aspirated from wells and cells were fixed in 4% paraformaldehyde in PBS for 15 minutes at room temperature. Cells were washed three times with PBS, then permeabilized with 0.1% triton X-100 in PBS for 15 minutes. Cells were blocked for 30 minutes in PBS containing 5% BSA and 2.2% glycine. Anti-GBP1 (Abcam ab131255, 1:150 dilution) was added in blocking buffer for 1 hour at room temperature. Cells were washed three times with PBS containing 0.05% triton X-100, then incubated with donkey anti-rabbit IgG Alexa Fluor 568 (Thermo Fisher A10042, 1:1000 dilution) and Hoechst 33258 (1 $\mu$ g/mL) for 45 minutes in blocking buffer. Cells were then washed three times with PBS containing 0.05% triton X-100 and mounted on glass slides. For experiments without any antibody staining, following fixation, cells were washed three times in PBS then incubated with 1  $\mu$ g/mL Hoechst for 20 minutes in PBS, washed twice with PBS and mounted on glass slides. Coverslips were mounted with mounting media containing 9 parts Mowiol solution (100 mM Tris-HCl, pH 8.5, 25% glycerol, 125  $\mu$ g/mL Mowiol 4-88) and 1 part PPD solution (0.1 mg/mL 1,4-Phenylenediamine dihydrochloride in water). Mounting media was allowed to harden overnight at room temperature. Images were acquired using a Zeiss Axio Observer Z1 microscope using Zeiss Plan-Apochromat 63 $\times$ /1.4 oil objective, or a DeltaVision Elite Deconvolution microscope with UPLSAPO 100 $\times$ /1.40 oil objective. Images were processed with DeltaVision software for deconvolution, or with Fiji.

## Time-lapse microscopy of infected cells

700,000 A459 GBP1-KO pInducer-mCherry, -GBP1, or GBP1<sup>3R</sup> cells were plated on glass bottom 10 mm microwell dishes and treated with 2  $\mu$ g/ml aTc and 100 U/ml IFN $\gamma$  for 20-22 h to stimulate mCherry fusion protein expression. Cells were infected with GFP-expressing *S. flexneri*  $\Delta$ ipaH9.8 $\Delta$ ospC3 as described above with the following alterations. After incubating cells at 37 °C and 5% CO<sub>2</sub> following centrifugation for 10 min at 700  $\times$  g at room temperature, cells were washed three times with 2 ml HBSS. After washing,

2 ml infection media supplemented with 150 nM sytox blue (Invitrogen) was added to each dish to stain cells undergoing pyroptosis. Time-lapse images of infected cells were acquired every 3 min with a Zeiss 880 AiryScan Fast Inverted Confocal on AxioObserver Z1 microscope using a Zeiss Plan-Apochromat 63×/1.4 oil objective, with stage incubator set to 37°C and 5% CO<sub>2</sub> buffering. All images were processed with Fiji.

### **LPS electroporation**

Electroporation was done using the Neon Transfection System (Thermo Fisher). Cells were plated in a 6 well plate and were either left untreated or were treated with 100 U/ml IFN $\gamma$  overnight. The next day, cells were trypsinized, washed twice with PBS and the cell number was determined. Cells were pelleted and diluted in Neon buffer R to 5,000 cells/ $\mu$ l. *E. coli* O55:B5 LPS (Invivogen tlr-pb5lps) was diluted in Neon R buffer to 500  $\mu$ g/ml, 100  $\mu$ g/ml and 50  $\mu$ g/ml. Cell and LPS dilutions were gently mixed and 500,000 cells were electroporated with either 2.5  $\mu$ g, 0.5  $\mu$ g or 0.25  $\mu$ g LPS in a 100  $\mu$ l Neon pipette tip using electrolytic buffer E2 and 2 pulses of 1005 V for 35 ms. After electroporation prewarmed infection media supplemented with 3  $\mu$ g/ml propidium iodide was quickly added to cells and 50,000 cells were plated per well in black tissue culture treated 96-well plates in triplicates. Non-electroporated cells left untreated or treated with 1% triton served as live and dead controls. Fluorescence was measured using an Enspire 2300 multilabel plate reader (Perkin Elmer) at 1, 2, and 4 hours post electroporation. After measuring fluorescence, 100  $\mu$ l supernatant was removed from each well and was frozen at -80°C until running IL-18 ELISA. IL-18 was measured using IL-18 ELISA matched antibody pair (Thermo Fisher BMS267-2MST) following manufacturer's instructions.

### **LPS transfection**

Transfection protocol was modified from Santos et al. (8) A549 cells were seeded in a 96 well plate,  $2.5 \times 10^4$  cells per well. The next day, LPS transfection mixture was prepared- for each well 75  $\mu$ l optimem (31985-062), 1  $\mu$ l lipofectamine 2000 (Invitrogen), and either 1  $\mu$ g or 0.1  $\mu$ g *E. coli* O55:B5 LPS (Invivogen tlr-pb5lps). LPS and lipofectamine mixture was incubated for 20 minutes before adding to cells. During incubation, media in 96 well plate was aspirated and 75  $\mu$ l optimem containing 0.5  $\mu$ M sytox green (Invitrogen) was added to each well. Lysed control wells contained 75  $\mu$ l optimem, 0.5  $\mu$ M sytox green, and 1% triton X-100. 75  $\mu$ l lipofectamine and LPS mixture was added on top of media containing sytox green.

### **Plasmids**

All GBP expression plasmids were in the lentiviral pInducer20 backbone (9) containing a C-terminal mCherry (GBP4) or N-terminal mCherry (all other constructs). Full plasmid sequences are provided as a supplemental file. For experiments using these plasmids, expression was induced by adding 1  $\mu$ g/ml anhydrotetracycline (Takara) overnight in cell culture media, or for titrations at concentration indicated in figure. When applicable, anhydrotetracycline was added at the same time as IFN $\gamma$ .

For *S. flexneri* luminescence experiments, strains were transformed with ilux pGEX(-), which was a gift from Stefan Hell (Addgene plasmid #107879; <http://n2t.net/addgene:107879> ; RRID:Addgene\_107879) *S. flexneri* was transformed with pGFPmut2 (10) for microscopy experiments.

For knockdown of CASP4, lentiviral vectors from the Mission shRNA collection (Sigma). Plasmids expressed shRNAs targeting GFP or CASP4 (shRNA TRCN0000003512) in the pLKO.1 backbone.

### **Lentivirus production and cell line complementation**

293T cells were plated in a 6 well plate with  $1 \times 10^6$  cells per well in 2ml. The next day cells were transfected using TransIT 293 transfection reagent (Mirus), following manufacturer's instructions. Each

well was transfected with 1 µg pInducer plasmid, 750 ng pSPAX2 (Addgene), 250 ng VSVG. At 24 hours post transfection, media was removed, and 3 ml fresh media added. Supernatant containing virus was collected at 48 and 72 hours post infection and filtered through 0.45 µm nylon filters (Corning). Virus was frozen at -80°C until use.

For transduction, A549 cells were trypsinized and resuspended in media containing 10 µg/mL polybrene (Millipore Sigma) to a concentration of  $3.33 \times 10^4$  cells/ml. In 6 well plate, 250 µl lentivirus supernatant (described above) and 1.5 ml diluted cells were added to each well. Cells were incubated for 48-72 hours, then 2 mg/ml geneticin was added for approximately 10 days to select for cells containing the pInducer plasmid. Cells transduced with pLKO.1 shRNA plasmids were selected with 1 µg/ml puromycin for 5 days.

### **Expression, purification, and prenylation of recombinant protein**

Recombinant GBP1, GBP5, and FTase were expressed and purified as described previously(11). N-terminally His<sub>6</sub>-tagged GBP1 and GBP2 were expressed in *E. coli* strain BL21 CodonPlus (DE3) RIL from bacterial vector pQE-80L. N-terminally His<sub>10</sub>-tagged GBP5 was expressed in *E. coli* strain Rosetta (DE3) pLysS from bacterial vector pQE-80L. N-terminal His<sub>6</sub>-tagged farnesyltransferase (FTase) and geranylgeranyltransferase (GGTase) were expressed in *E. coli* strains Rosetta (DE3) pLysS and BL21 CodonPlus (DE3) RIL from pRSF-Duet1 vector. Bacteria were cultivated in terrific broth media (GBPs), or terrific broth media supplemented with 60 µM ZnCl<sub>2</sub> (FTase, GGTase) and grown at 37 °C and 90 rpm to an OD<sub>600</sub> of 0.4–0.8. After decreasing the temperature to 20 °C, protein expression was induced with 100 µM IPTG. For FTase and GGTase expression, an additional 0.5 mM ZnCl<sub>2</sub> was added to the culture. Bacteria were harvested after 16–18 h at 3000 x g for 15 min at 4°C (Sorvall LYNX 6000 centrifuge, F9-6x1000 LEX rotor, Thermo Fisher Scientific).

Buffer compositions for the purification of recombinant GBPs and FTase or GGTase differed in the use of 50 mM HEPES, pH 7.8 for FTase and GGTase instead of 50 mM Tris-HCl, pH 7.9 for GBPs. Harvested bacteria were resuspended in buffer A (50 mM Tris-HCl, pH 7.9, 500 mM NaCl, 5 mM MgCl<sub>2</sub>) supplemented with 1 mM phenylmethylsulfonyl fluoride to inhibit proteases and sonicated on ice at 30% amplitude pulsing at 1 sec on/ 1 sec off for a total of 10 min (Ultrasonic homogenizer Sonoplus HD 2200, Bandelin) with the temperature of the resuspension kept below 8 °C. Cell debris was removed from lysate containing soluble protein by centrifugation at 35,000 x g and 4 °C for 45 min (Sorvall LYNX 6000 centrifuge, F21-8x50y rotor, Thermo Fisher Scientific). Proteins were further purified by immobilized metal affinity chromatography (IMAC) followed by size-exclusion chromatography (SEC). All chromatography columns were connected to ÄKTA Purifier or Prime systems (GE Healthcare Life Sciences). After loading of soluble proteins, the IMAC column (30 ml HisPur Cobalt Resin, 30 ml) was sequentially washed with 5-10 column volumes (CVs) buffer A and 3-4 CVs buffer B<sub>10</sub> (50 mM Tris-HCl, pH 7.9, 150 mM NaCl, 5 mM MgCl<sub>2</sub>, 10 mM imidazole). His-tagged protein was eluted with 2 CVs buffer B<sub>150</sub> (50 mM Tris-HCl, pH 7.9, 150 mM NaCl, 5 mM MgCl<sub>2</sub>, 150 mM imidazole). GBP containing fractions from IMAC were pooled and precipitated by slowly adding 3 M (NH<sub>4</sub>)<sub>2</sub>SO<sub>4</sub>. (NH<sub>4</sub>)<sub>2</sub>SO<sub>4</sub> protein precipitates were dissolved in buffer C (50 mM Tris-HCl, pH 7.9, 150 mM NaCl, 5 mM MgCl<sub>2</sub>) and loaded on a with buffer C equilibrated SEC column (Superdex 200 26/ 60, 320 ml) to remove (NH<sub>4</sub>)<sub>2</sub>SO<sub>4</sub> and aggregated protein from monomeric protein. FTase and GGTase containing fractions from IMAC were pooled, concentrated via ultra-filtration using Vivaspin 20 centrifugal columns (10 kDa cut-off, Sartorius), and loaded on the SEC column (Superdex 200 26/ 60, 320 ml) to isolate monomeric protein. Fractions containing monomeric GBPs, FTase, and GGTase were pooled, concentrated via ultra-filtration using 10 kDa cut-off Vivaspin 20 centrifugal columns, frozen in liquid nitrogen, and stored at -80°C.

GBP1 was farnesylated *in vitro* as described previously(12). Monomeric GBP1, GBP2, and GBP5 were incubated for 16 h at 4°C in glass vials with farnesyl pyrophosphate (FPP) or geranylgeranyl

pyrophosphate (GGPP) and FTase or GGTase in buffer D (50 mM Tris-HCl, pH 7.9, 5 mM MgCl<sub>2</sub>, 150 mM NaCl, 10 μM ZnCl<sub>2</sub>). For farnesylation, 60 μM GBP1 was supplemented with 150 μM FPP and 1.25 μM FTase in a total volume of 4 ml. For geranylgeranylation, 60 μM GBP2 or GBP5 were supplemented with 150 μM GGPP and 5 μM GGTase in a total volume of 4 ml. Reaction mixtures were supplemented with (NH<sub>4</sub>)<sub>2</sub>SO<sub>4</sub> (3 M stock solution) to a final concentration of 1.25 M and loaded on a hydrophobic interaction chromatography (HIC) column (Butyl FF 16/10, 20 ml), equilibrated with buffer E (50 mM Tris-HCl, pH 7.9, 5 mM MgCl<sub>2</sub>, 1.2 M (NH<sub>4</sub>)<sub>2</sub>SO<sub>4</sub>). For GBP1, after loading, the HIC column was sequentially washed with 2 CVs buffer E and with 2 CVs of buffer E with its initial (NH<sub>4</sub>)<sub>2</sub>SO<sub>4</sub> concentration decreased to 60%. Farnesylated GBP1 was separated from non-farnesylated GBP1 by decreasing the (NH<sub>4</sub>)<sub>2</sub>SO<sub>4</sub> concentration further in a continuous gradient over 3 CVs from 60% to 45% (NH<sub>4</sub>)<sub>2</sub>SO<sub>4</sub> (elution of farnesylated GBP1) followed by a continuous gradient over 3.75 CVs from 45% to 25% (NH<sub>4</sub>)<sub>2</sub>SO<sub>4</sub> (elution of non-farnesylated GBP1). For GBP2 and GBP5, after loading, the HIC column was sequentially washed with 2 CVs buffer E and with 2 CVs of buffer E with its initial (NH<sub>4</sub>)<sub>2</sub>SO<sub>4</sub> concentration decreased to 80%. Geranylgeranylated GBP2 and GBP5 were eluted from the HIC by decreasing the (NH<sub>4</sub>)<sub>2</sub>SO<sub>4</sub> concentration from 80% to 0% in a continuous gradient over 20 CVs. Fractions with prenylated GBPs were pooled, concentrated via ultra-filtration using 10 kDa cut-off Vivaspin 20 centrifugal columns and further purified by SEC to isolate monomeric protein. Following SEC, fractions with monomeric prenylated GBPs were pooled, concentrated via ultra-filtration, frozen in liquid nitrogen, and stored at -80°C. Concentrations of proteins were calculated according to Lambert–Beer law, using absorption at 280 nm in buffer F (6 M guanidine hydrochloride, 20 mM potassium phosphate, pH 6.5) and respective molar absorption coefficients (GBP1 43,240 M<sup>-1</sup>cm<sup>-1</sup>, GBP2 52,050 M<sup>-1</sup>cm<sup>-1</sup>, GBP5 46,005 M<sup>-1</sup>cm<sup>-1</sup>, FTase 158,235 M<sup>-1</sup>cm<sup>-1</sup>, GGTase 138,170 M<sup>-1</sup>cm<sup>-1</sup>).

### **Labeling of recombinant proteins with fluorescent dyes**

After exchanging buffer C to buffer G (50 mM Tris-HCl, pH 7.4, 150 mM NaCl, and 5 mM MgCl<sub>2</sub>), recombinant GBPs were incubated with Alexa Fluor 488 C<sub>5</sub> maleimide dye or Alexa Fluor 647 C<sub>2</sub> maleimide dye (Invitrogen) in a ratio of 1:1 or 1:2 on ice for 10–20 min. Labeling reactions were stopped by changing buffer G to buffer C supplemented with 2 mM DTT via ultra-filtration using 10 kDa cut-off Vivaspin Turbo 4 centrifugal columns. Concentrations of proteins and labeling efficiencies were calculated according to Lambert-Beer law, using absorptions at 280 nm, 491 nm, and 651 nm in buffer C, respective molar absorption coefficients (GBP1 45,840 M<sup>-1</sup>cm<sup>-1</sup>, GBP2 53,860 M<sup>-1</sup>cm<sup>-1</sup>, GBP5 45,380 M<sup>-1</sup>cm<sup>-1</sup>, Alexa Fluor 488 71,000 M<sup>-1</sup>cm<sup>-1</sup>, Alexa Fluor 647 268,000 M<sup>-1</sup>cm<sup>-1</sup>), and correction factors for fluorescent dyes (Alexa Fluor 488 0.11, Alexa-Fluor647 0.03). Labeling efficiencies for Alexa Fluor 488-labeled proteins ranged from 44% to 120%. Labeling efficiencies for Alexa Fluor 647-labeled proteins ranged from 13% to 49%.

### **Binding of protein to bacteria**

*S. flexneri* expressing RFP was streaked on an agar plate, then single colonies were picked and grown overnight at 37 °C shaking, in 5 ml TSB. The next day 175 μl overnight culture was diluted into 5 ml TSB and grown for 1 hour 20 minutes. 2.5 ml bacterial culture was pelleted, washed with 1 ml PBS, and resuspended in 1 ml 4% formaldehyde in PBS, pH 7.4 for 20 min to fix. Formaldehyde-fixed bacteria were washed twice with PBS and resuspended in PBS supplemented with 0.03% NaN<sub>3</sub>. Final concentrations for *in vitro* binding experiments were 10<sup>5</sup>-3 x 10<sup>6</sup> bacteria/ml, 5 μM GBP, and 2 mM GTP. Bacteria were diluted in buffer C, supplemented with 50 μM BSA, and the dilution was applied to the cover slide of a glass bottom 10 mm microwell dish. Following centrifugation for 1 min at 3,000 x g bacteria were incubated for 5 min at 25 °C on the temperature-controlled microscope stage. Alexa Fluor-labeled GBPs were diluted in buffer C supplemented with 50 μM BSA, mixed with GTP, and the mixture was

added to bacteria at  $t = 0$  min. The samples were gently mixed, and images were collected every 1.5 min. After recording time-lapse images for 60 min different field of views were imaged for quantification. Imaging was performed on a Zeiss 880 Airyscan Fast Inverted Confocal on Axio Observer Z1 microscopes using Zeiss Plan-Apochromat 63 $\times$ / 1.4 oil objectives. All images were processed with Fiji.

### **LPS aggregation**

Final concentrations for LPS aggregation microscopy experiments were 5  $\mu$ M recombinant GBP, 50  $\mu$ g/ml LPS, and 2 mM GTP. Alexa Fluor 568-labeled *E. coli* O55:B5 LPS (Invitrogen) was diluted in buffer C, supplemented with 50  $\mu$ M BSA, and the dilution was applied to the cover slide of a glass bottom 10 mm microwell dish. Following centrifugation for 1 min at 3,000  $\times$  g bacteria were incubated for 5 min at 25  $^{\circ}$ C on the temperature-controlled microscope stage. GBPs were diluted in buffer C supplemented with 50  $\mu$ M BSA, mixed with GTP, and the mixture was added to LPS at  $t = 0$  min. The samples were gently mixed, and after 20 min, different field of views were imaged for quantification. Imaging was performed on a Zeiss 880 Airyscan Fast Inverted Confocal on Axio Observer Z1 microscopes using Zeiss Plan-Apochromat 63 $\times$ / 1.4 oil objectives. All images were processed with Fiji and LPS areas and numbers were quantified with the integrated analyze particle tool.

### **Dynamic light scattering**

Dynamic light scattering (DLS) experiments of recombinant GBPs and LPS was performed with Delsa Max Pro instrument (Beckman Coulter). GBPs were diluted in buffer C or buffer C (apo) supplemented with 300  $\mu$ M AIF $_x$ , 10 mM NaF, and 250  $\mu$ M GDP (GDP $\cdot$ AIF $_x$ ) to a final concentration of 5  $\mu$ M in the presence or absence of 0.05 mg/ml *E. coli* O55:B5 LPS. Samples were incubated at room temperature (RT) for 1 hour prior starting DLS measurements in a temperature-controlled cuvette set to RT. The particle size was measured over three measurements, each consisting of ten runs. The number-weighted radius ( $R_n$ ) of the particles was determined with the manufacturer's software. A series of controls were also measured to establish the underlying particle sizes of the filtered aqueous buffers and the protein solutions. These were buffer C, buffer C supplemented with GDP $\cdot$ AIF $_x$ , and 5  $\mu$ M bovine serum albumin (BSA) or 0.05 mg/ml LPS in the respective buffers.

### **Absorbance-based light scattering**

Absorbance-based light scattering experiments were performed with a Specord200 UV/Vis spectrophotometer (Analytik Jena) as described previously(13). GBP1, GBP2, and GBP5 were diluted in buffer C supplemented with 50  $\mu$ M BSA to a final concentration of 5  $\mu$ M. Protein dilutions were incubated in a temperature-controlled cuvette at 25 $^{\circ}$ C for 5 min. GTP was added to protein dilutions at a final concentration of 2 mM to start GBP self-assembly. Polymerization of GBPs was followed as absorbance signal at 350 nm over time. To determine formation of mixed polymers, absorbance of 5  $\mu$ M GBP1 in the presence of 5  $\mu$ M GBP1, GBP2, or GBP5 following GTP addition was monitored (final GBP concentration 10  $\mu$ M, polymerization of 5  $\mu$ M GBP1 is shown as control).

### **Native polyacrylamide gel electrophoresis**

Native GBP-LPS complexes were analyzed with native polyacrylamide gel electrophoresis (NPAGE). Recombinant GBP1, GBP2, GBP5, BSA (control), and *E. coli* O55:B5 LPS were diluted in buffer C or buffer C supplemented with 300  $\mu$ M AIF $_x$  and 10 mM NaF. Protein and LPS dilutions were mixed, and GDP was added to induce complex formation. Final concentrations were 5  $\mu$ M protein, 250  $\mu$ M GDP, 1 mg/ml, 0.1 mg/l, or 0.01 mg/ml LPS (Fig. 7B), and 2 mg/ml to 0.008 mg/ml (1:1 dilution, Fig. 7C and Fig. S6C). After incubation at RT for 30 min, samples were mixed 1:1 with 2  $\times$  native sample buffer (BioRad) and loaded on a 4-20% precast protein gel (BioRad) for electrophoresis in Tris/Glycine running buffer



(BioRad) at 80 V for 15 min followed by 180 V for 1 h. After electrophoresis, gels were fixed overnight in 60% methanol and 10% acetic acid. The next day, gels were rehydrated in 3% acetic acid and successively stained using Pro-Q Emerald 300 Lipopolysaccharide Gel Stain Kit (Invitrogen) and Coomassie Brilliant Blue R-250. LPS staining and Coomassie staining were visualized with an Azure 500 Biosystem using excitation at 365 nm and emission at 595 nm or the UV320 Coomassie detection program (utilizing the orange tray), respectively. All gel images were processed with Fiji. Gel bands were analyzed with the built-in Fiji tool.

### **Caspase-4 activation**

Caspase-4 activity was determined as described previously (14) with the following modifications. Recombinant GBP1, GBP1<sup>R48A</sup>, GBP1<sup>3R</sup>, and GBP2, were diluted in buffer H (50 mM Tris-HCl, pH 7.4, 150 mM NaCl, and 5 mM MgCl<sub>2</sub>, 2 mM EDTA, 10 mM DTT) supplemented with *E. coli* O55:B5 LPS, and GTP (or buffer as control) was added to induce aggregate formation. After incubation at 37 °C for 30 min, reactions were mixed 1:1 with recombinant caspase-4 diluted in buffer H in a black 96 well plate with non-binding surface (Corning), and Z-VAD-AMC (Cayman Chemical) diluted in buffer H was added to each sample. Fluorescence was measured with an Enspire 2300 multilabel plate reader (Perkin Elmer) using excitation at 365 nm and emission at 450 nm. Final concentrations were 5 μM GBP, 0.05 mg/ml LPS, 1 mM GTP, 0.05 μM caspase-4, and 75 μM Z-VAD-AMC. N-terminal GST tagged, human full-length caspase-4 expressed in and purified from wheat germ (Novus Biologicals, H00000837-P01) was used to avoid LPS contamination. Fluorescence intensities were normalized to basal caspase-4 activities (Fig. 7D and E, Fig. S9D lower panel). Free AMC amounts upon Z-VAD-AMC cleavage were determined by correlating fluorescence intensities to fluorescence intensities measured for defined AMC concentrations in calibration experiments following established protocols (15) (Fig. S9D upper panel).

### **References**

1. F. A. Ran *et al.*, Genome engineering using the CRISPR-Cas9 system. *Nat Protoc* **8**, 2281-2308 (2013).
2. A. K. Haldar *et al.*, Chlamydia trachomatis Is Resistant to Inclusion Ubiquitination and Associated Host Defense in Gamma Interferon-Primed Human Epithelial Cells. *mBio* **7** (2016).
3. K. Labun *et al.*, CHOPCHOP v3: expanding the CRISPR web toolbox beyond genome editing. *Nucleic Acids Res* **47**, W171-W174 (2019).
4. S. Bae, J. Park, J. S. Kim, Cas-OFFinder: a fast and versatile algorithm that searches for potential off-target sites of Cas9 RNA-guided endonucleases. *Bioinformatics* **30**, 1473-1475 (2014).
5. A. S. Piro *et al.*, Detection of Cytosolic Shigella flexneri via a C-Terminal Triple-Arginine Motif of GBP1 Inhibits Actin-Based Motility. *mBio* **8** (2017).
6. X. Mou, S. Souter, J. Du, A. Z. Reeves, C. F. Lesser, Synthetic bottom-up approach reveals the complex interplay of Shigella effectors in regulation of epithelial cell death. *Proc Natl Acad Sci U S A* **115**, 6452-6457 (2018).
7. M. Kutsch *et al.*, Direct binding of polymeric GBP1 to LPS disrupts bacterial cell envelope functions. *EMBO J* **39**, e104926 (2020).
8. J. C. Santos *et al.*, Human GBP1 binds LPS to initiate assembly of a caspase-4 activating platform on cytosolic bacteria. *Nat Commun* **11**, 3276 (2020).

9. K. L. Meerbrey *et al.*, The pINDUCER lentiviral toolkit for inducible RNA interference in vitro and in vivo. *Proc Natl Acad Sci U S A* **108**, 3665-3670 (2011).
10. B. P. Cormack, R. H. Valdivia, S. Falkow, FACS-optimized mutants of the green fluorescent protein (GFP). *Gene* **173**, 33-38 (1996).
11. S. Ince, M. Kutsch, S. Shydlovskiy, C. Herrmann, The human guanylate-binding proteins hGBP-1 and hGBP-5 cycle between monomers and dimers only. *FEBS J* **284**, 2284-2301 (2017).
12. L. Sistemich *et al.*, The Molecular Mechanism of Polymer Formation of Farnesylated Human Guanylate-binding Protein 1. *J Mol Biol* **432**, 2164-2185 (2020).
13. S. Shydlovskiy *et al.*, Nucleotide-dependent farnesyl switch orchestrates polymerization and membrane binding of human guanylate-binding protein 1. *Proc Natl Acad Sci U S A* **114**, E5559-E5568 (2017).
14. J. Shi *et al.*, Inflammatory caspases are innate immune receptors for intracellular LPS. *Nature* **514**, 187-192 (2014).
15. D. Boucher, C. Duclos, J. B. Denault, General in vitro caspase assay procedures. *Methods Mol Biol* **1133**, 3-39 (2014).

Supplementary Figures

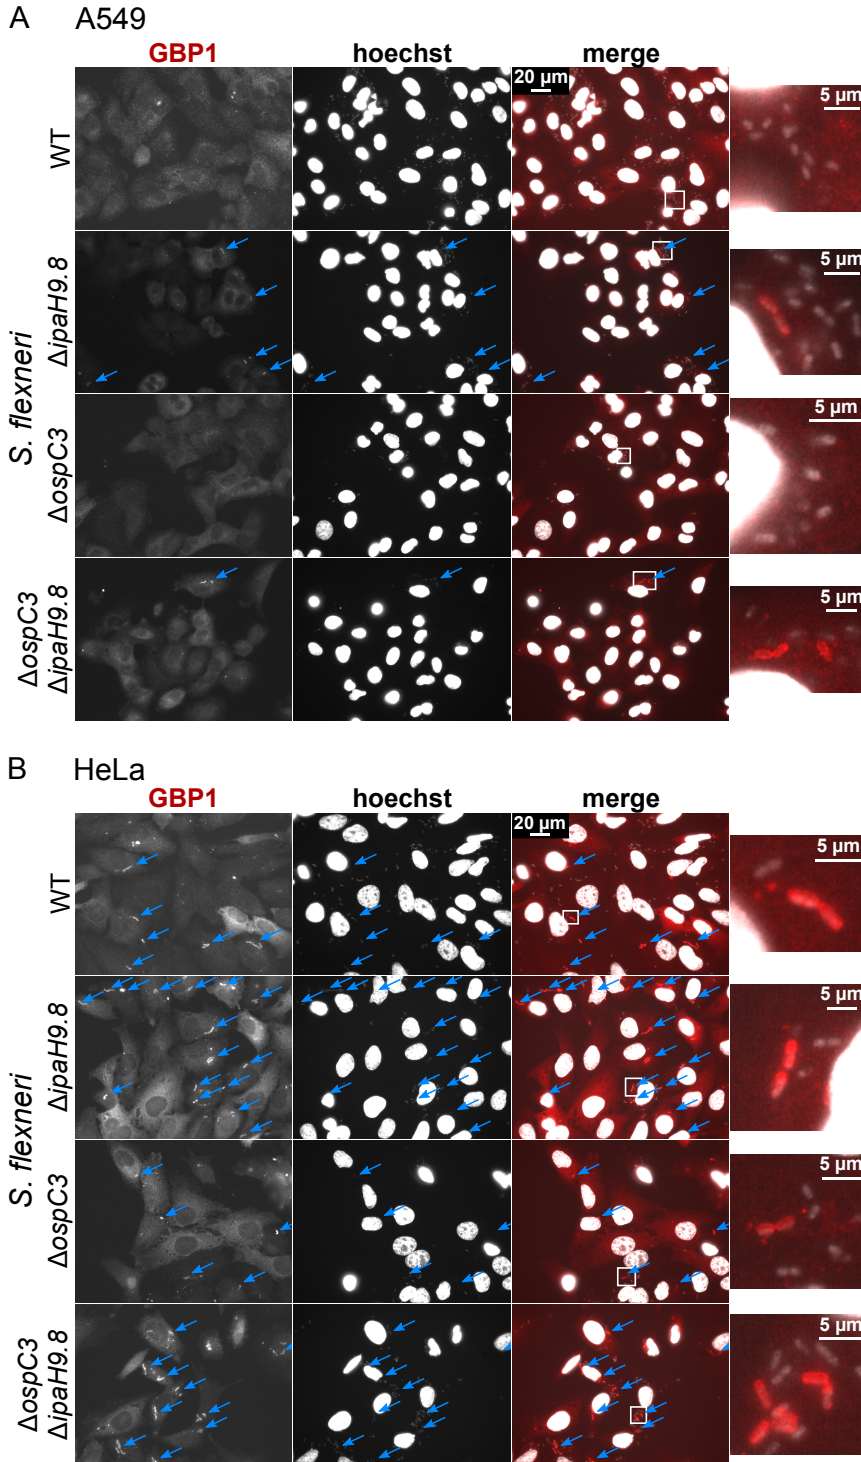

**Figure S1. A549 cells have less frequent GBP1 binding to *S. flexneri*, compared to HeLa cells.** A549 (A) and HeLa (B) cells were infected with the indicated strains, fixed at 1.5 hours post infection and immunostained for GBP1. Bacteria were visualized with DNA stain Hoechst. *S. flexneri* with GBP1 surrounding >50% of the bacterial surface were counted as GBP1 positive. Blue arrows indicate clusters of *S. flexneri* that are coated with GBP1. Images were taken at 63 $\times$  magnification and are representative of three independent experiments.

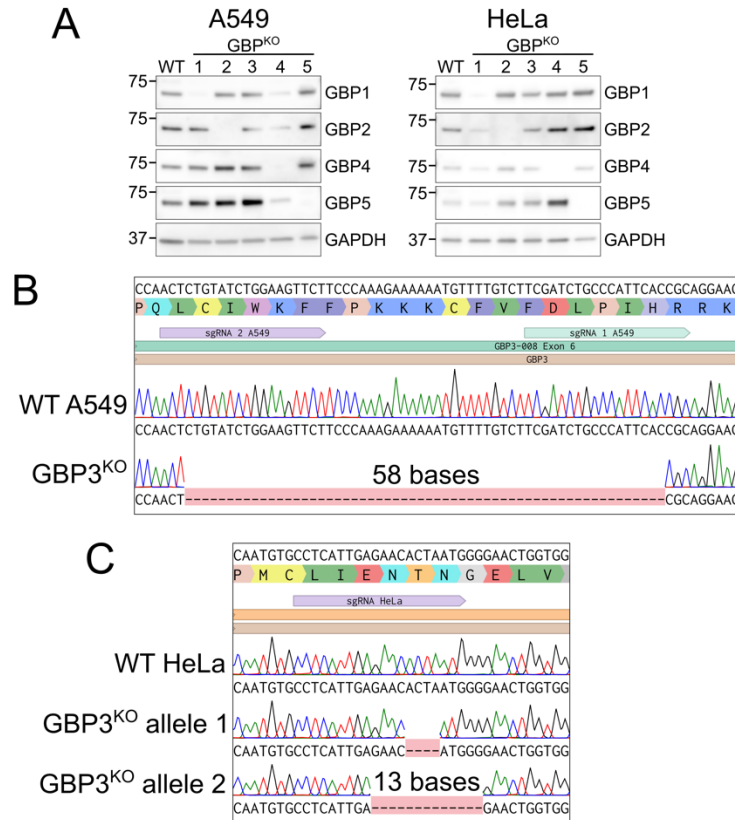

**Figure S2. GBP1-5 were individually knocked out in A549 and HeLa cells.** A549 and HeLa wildtype or CRISPR knockout clones were plated and primed with 100 U/ml IFN $\gamma$  overnight. Cells were then lysed and GBP or GAPDH expression was analyzed by western blot. (B) Genomic DNA was extracted from wildtype and GBP3<sup>KO</sup> A549 cells, PCR was used to amplify the edited region of the GBP3 gene, then PCR product was sequenced using sanger sequencing. Alignments were made using Benchling. (C) Genomic DNA was extracted from wildtype and GBP3<sup>KO</sup> HeLa cells, PCR was used to amplify the edited region of the GBP3 gene, then PCR cloning was used to separate different alleles. Colony PCR and sanger sequencing were used to determine the sequence of each allele. Alignments were made using Benchling.

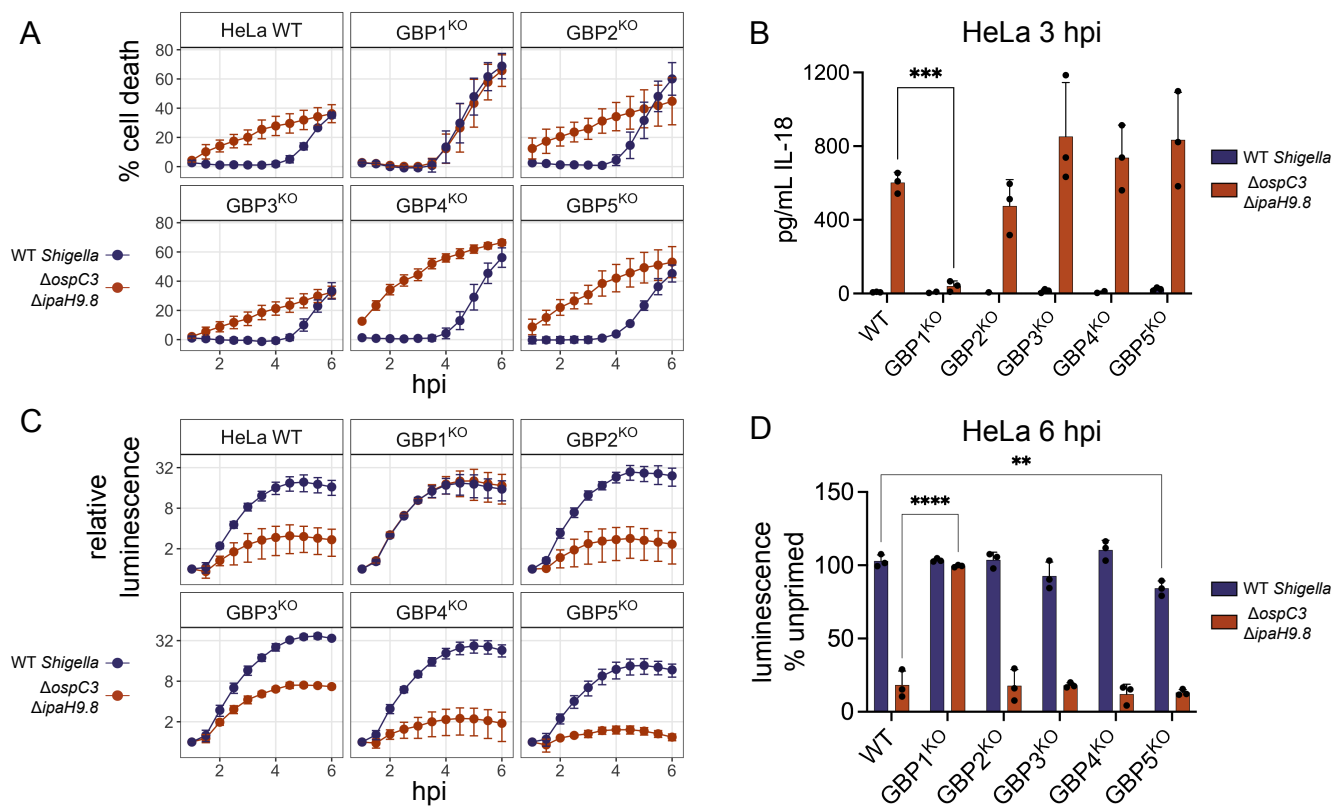

**Fig. S3. HeLa cells require endogenous GBP1 for pyroptosis and restriction of *S. flexneri* growth.** HeLa cells were primed overnight with 100 U/mL IFN $\gamma$ , then infected with wild-type *S. flexneri* or *S. flexneri*  $\Delta ipaH9.8 \Delta ospC3$  expressing a bioluminescent reporter plasmid. Cell death was measured using sytox green (A). Supernatant was taken at 3 hpi to measure IL-18 secretion (B). Bacterial growth was monitored by luminescence (C). Luminescence measurements from the 6 h timepoint were used to calculate the growth of each strain in primed cells relative to unprimed cells (D). Data are averages from three independent experiments and are represented by mean  $\pm$  SD. Two-way ANOVA with Dunnett's multiple comparisons test was used; for each bacterial strain, values for each knockout cell line were compared to the wild-type cells. All statistically significant comparisons are shown. \* $P < 0.05$ , \*\* $P < 0.01$ , \*\*\* $P < 0.001$ , \*\*\*\* $P < 0.0001$ .

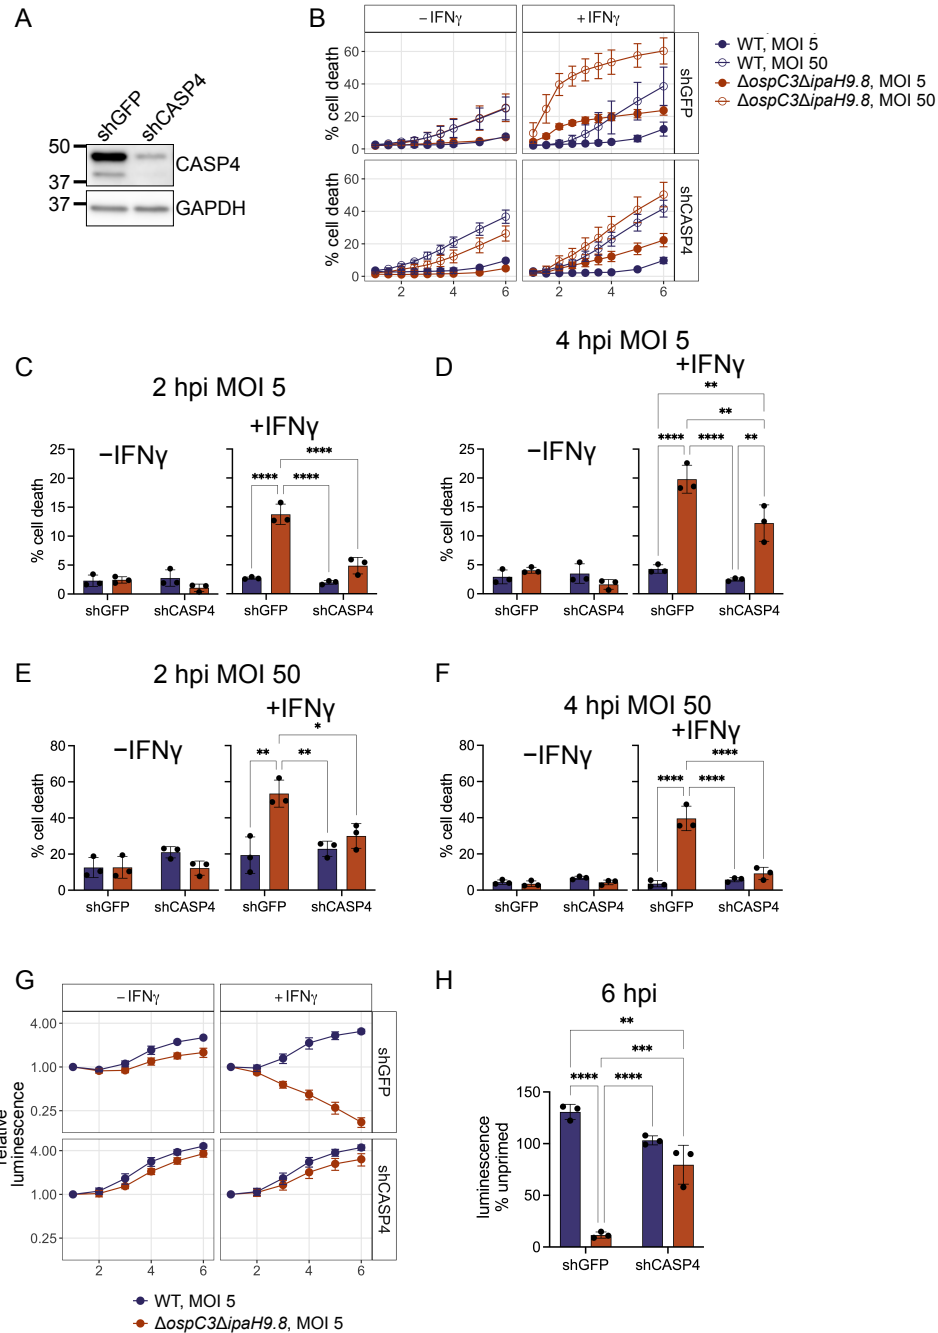

**Figure S4. *S. flexneri*  $\Delta ospC3\Delta ipaH9.8$ -induced pyroptosis requires CASP4.** A549 cells were transduced with lentiviral vectors expressing a control shRNA targeting GFP or an shRNA targeting caspase-4. (A) Western blot was used to determine knockdown efficiency. (B) Cells were infected with indicated strains of *S. flexneri* at a multiplicity of infection (MOI) of 5 or 50, and cell death was measured over time using sytox green. Percent cell death at 2 hpi (C and E) or 4 hpi (D and F) was used for statistical analysis. Luminescence was used to measure bacterial growth over time (G). *S. flexneri* replication in IFN $\gamma$  primed cells divided by luminescence signal in unprimed cells at 6 hours post infection (H). Data in graphs show averages of three independent experiment and error bars show standard deviation. In C, D, E, F, H statistical significance was determined using two-way ANOVA with Tukey's multiple comparisons test. All significant comparisons are shown, \* =  $P < 0.05$ , \*\* =  $P < 0.01$ , \*\*\* =  $P < 0.001$ , \*\*\*\* =  $P < 0.0001$ .

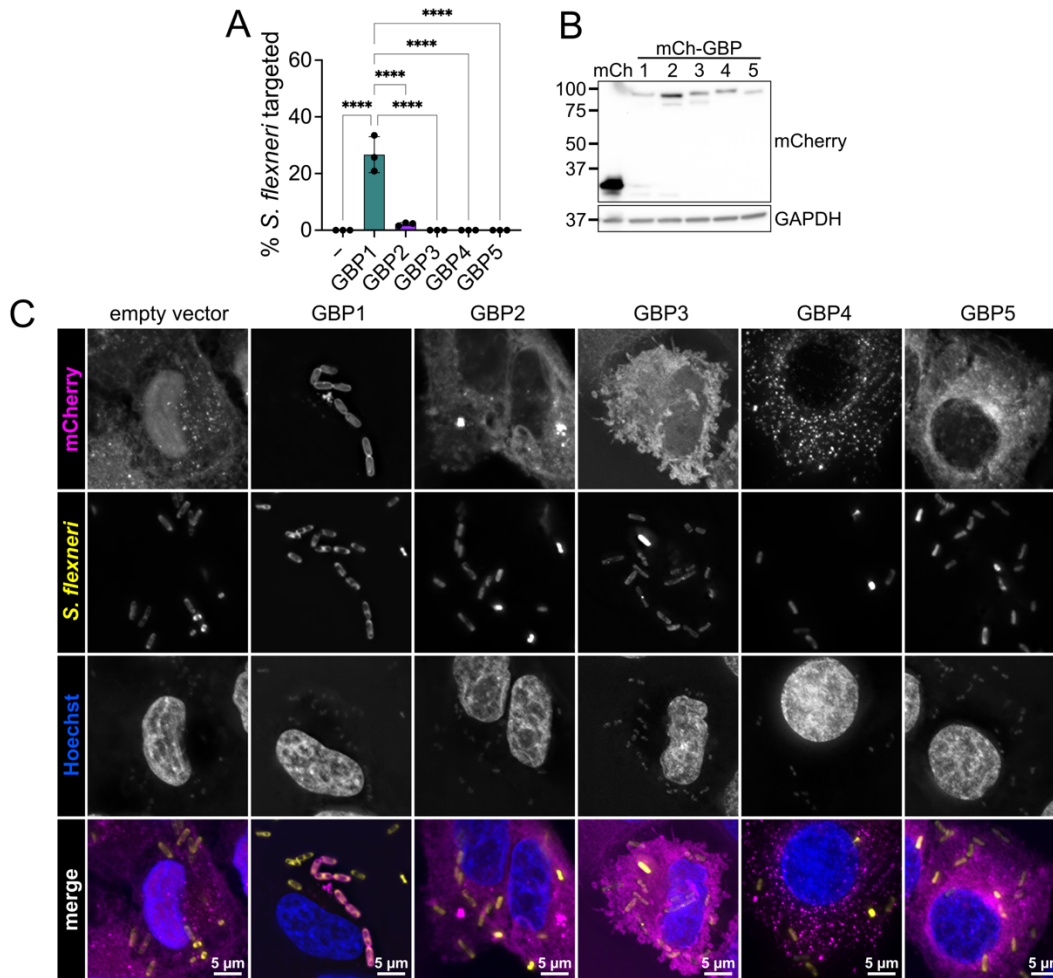

**Figure S5. GBP1, but not GBP2-5, can bind bacteria in cells.** (A) A549 GBP1<sup>KO</sup> cells overexpressing mCherry or mCherry-GBPs were primed with 100 U/ml IFN $\gamma$  overnight, then infected with *S. flexneri*  $\Delta ipaH9.8$  expressing GFP. Cells were fixed at 2 hpi, images were taken at 63x by widefield microscopy, then total number of *S. flexneri* as well as mCherry positive *S. flexneri* were counted using ImageJ. *S. flexneri* with mCherry signal around at least 50% of the bacterial membrane were counted as targeted. (B) Expression levels of each mCherry constructs were tested using western blot. (C) A549 GBP1<sup>KO</sup> cells overexpressing mCherry or mCherry-GBPs were primed with 100 U/ml IFN $\gamma$  overnight, then infected with *S. flexneri*  $\Delta ipaH9.8$  expressing GFP. Cells were fixed at 2 hpi and images were taken at 100x magnification by widefield microscopy. Images were deconvolved and z-projections are shown. (A) Graph shows averages from three independent experiments and is represented by mean  $\pm$  SD. One-way ANOVA with Tukey's multiple comparisons test was used. All significant comparisons are shown. \*\*\*\* =  $P < 0.0001$ . (B and C) Images are representative of three independent experiments.

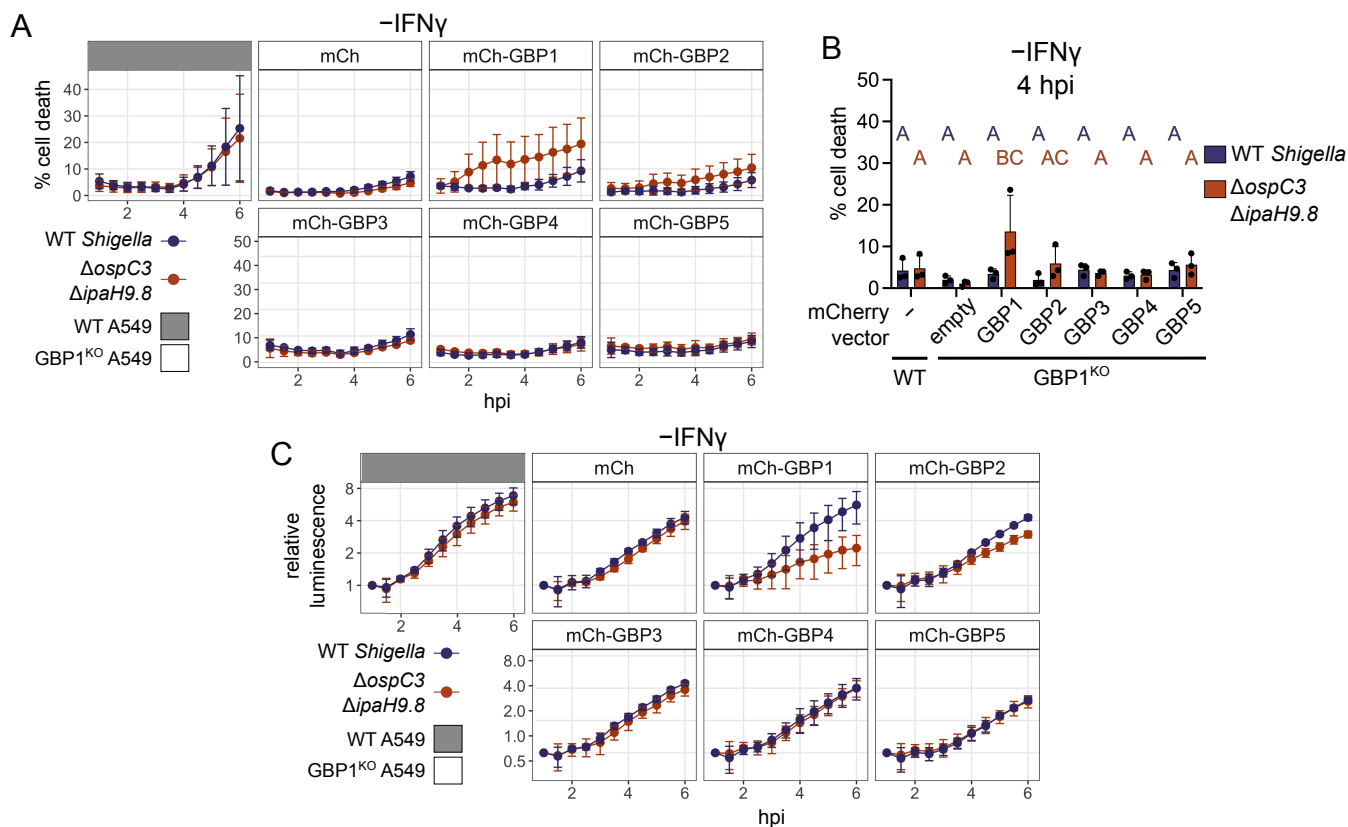

**Fig. S6. Overexpression of GBP1 or GBP2 in unprimed cells has little effect on pyroptosis and bacterial restriction.** A549 cells were stably transduced to express mCherry or mCherry-GBPs. Cells were then infected with bioluminescent *S. flexneri* and cell death was measured over time using sytox green fluorescence in unprimed cells (A). The sytox green signal at 4 h was used to determine statistical significance (B). Bacterial luminescence was measured over time (C). Data are averages from three independent experiments and are represented by mean  $\pm$  SD. Two-way ANOVA with Tukey's multiple comparisons test was used. Statistical comparisons are shown by letters, with bars sharing no matching letters being significantly different. Purple letters correspond to statistical comparisons for wild-type *S. flexneri*, and orange letters correspond to *S. flexneri*  $\Delta ipaH9.8 \Delta ospC3$ .



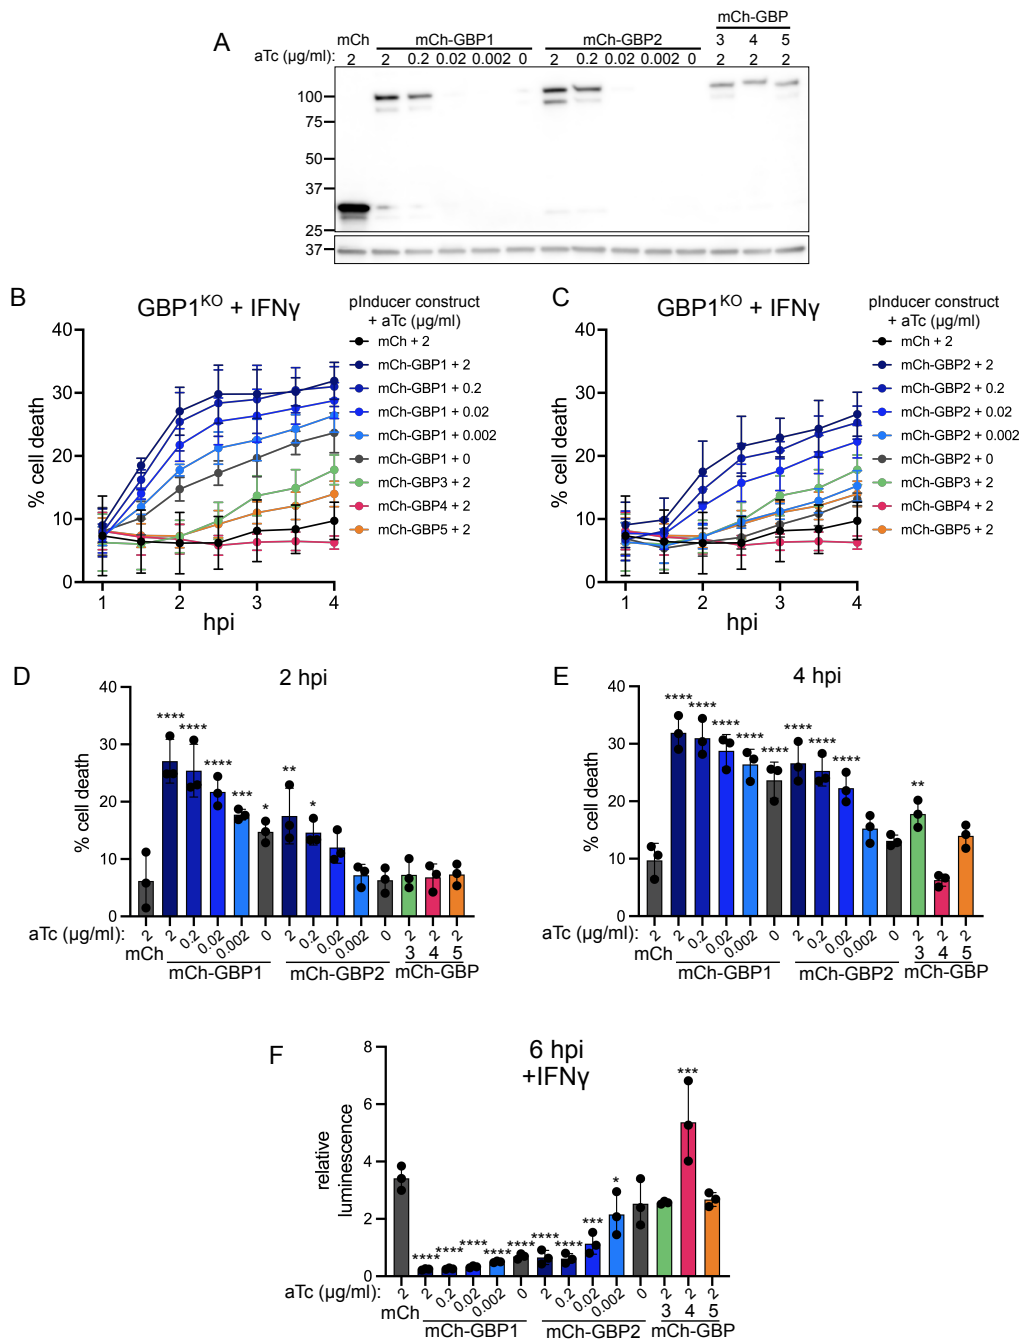

**Figure S7. GBP1 and GBP2 promote pyroptosis even with low levels of expression.** A549 GBP1<sup>KO</sup> cells were transduced with plInducer-mCherry constructs and anhydrotetracycline (aTc) was used to induce mCherry-GBP expression. Expression of mCherry-GBP1 and mCherry-GBP2 was titrated using different concentrations of aTc. mCherry control vector, mCherry-GBP3, mCherry-GBP4, and mCherry-GBP5 were expressed at maximal levels. Western blot using an antibody against mCherry was used to assess expression levels (A). These cells were infected with *S. flexneri*  $\Delta ospC3\Delta ipaH9.8$  and sytox green fluorescence was used to determine cell death promoted by each construct. Cell death data showing GBP1 titration (A) and GBP2 titration (B) is from same experiments, split into two graphs to make it easier to read. Data for mCherry, mCherry-GBP3, mCherry-GBP4, and mCherry-GBP5 is identical in both graphs. 2 hpi and 4 hpi from B and C were used to compare cell death levels between cells expressing different constructs (D and E). Luminescence was used to measure bacterial growth over time, and luminescence at 6 hpi relative to 1 hpi was used to assess growth differences in the presence of indicated constructs (F). Data in graphs contains mean  $\pm$  SD from three independent experiments. Significance in D, E, F was determined using one-way ANOVA with Dunnett's multiple comparisons test, comparing to mCherry. \* =  $P < 0.05$ , \*\* =  $P < 0.01$ , \*\*\* =  $P < 0.001$ , \*\*\*\* =  $P < 0.0001$ .

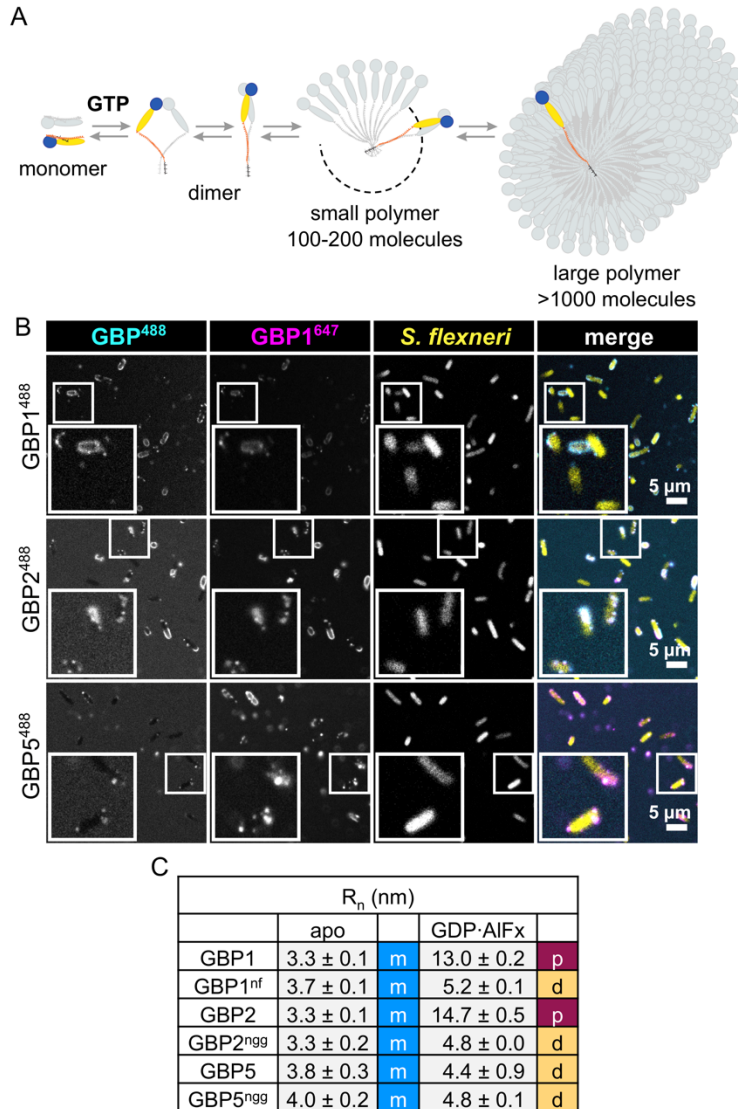

**Figure S8. Mixed GBP1-GBP2 and GBP1-GBP5 polymers attach to the bacterial surface.** (A) Mechanism of GBP1 polymerization. GBP1 exit its closed monomeric state, in which the farnesyl moiety is buried inside a hydrophobic pocket, and forms dimers in a GTP hydrolysis-dependent manner. GBP1 dimers can assemble into small polymers consisting of 100-200 molecules and continue their growth to form large polymers holding over 1000 molecules. (B) Confocal microscopy time frames of recombinant Alexa Fluor 488-labeled GBP1, GBP2, or GBP5 mixed with Alexa-647-labeled GBP1 supplemented with GTP at 5 min after addition to formaldehyde-fixed RFP-expressing *S. flexneri*. (C) Number-weighted mean radius ( $R_n$ ) of nucleotide-free (apo) or GDP·AIF<sub>x</sub>-bound nonisoprenylated (non-farnesylated = nf, non-geranylgeranylated = ngg) and isoprenylated GBPs determined in DLS experiments (values for data shown in Fig. 4G). monomer – m; dimer – d; polymer – p. (B) Representative images of three independent experiments. (C) Mean  $\pm$  SD from three independent experiments.

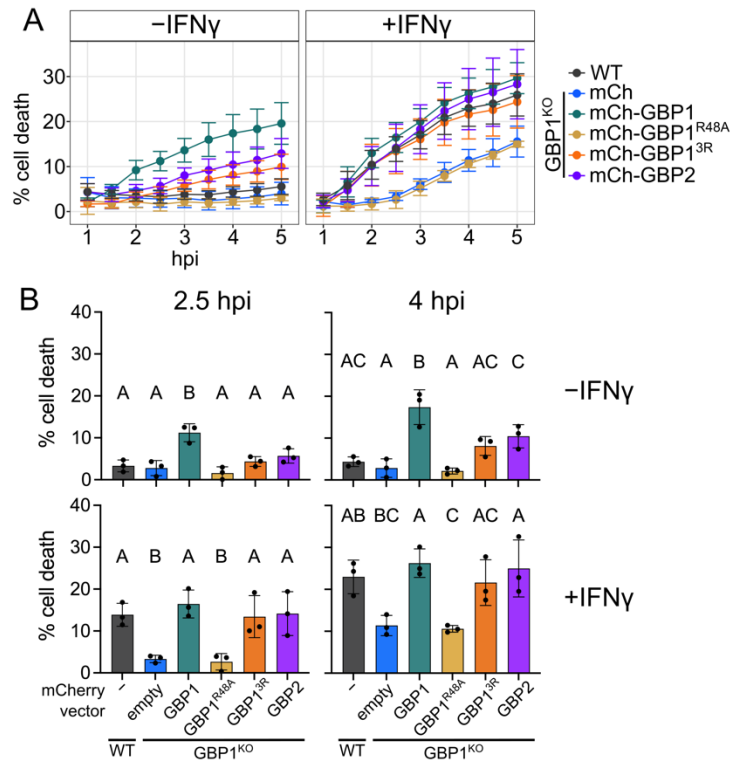

**Figure S9. GBP1, GBP1<sup>3R</sup>, and GBP2 can rescue pyroptosis in GBP1<sup>KO</sup> cells during *S. Typhimurium* infection.** Wildtype A549 or GBP1<sup>KO</sup> A549 cells overexpressing mCherry or mCherry-GBPs were plated and cells were unprimed or primed with 100 U/ml IFN $\gamma$  overnight, then infected with *S. Typhimurium*. Cell death was monitored over time using sytox green fluorescence (A). For statistical analysis, the sytox green signal at 2.5 hours and 4 hours post infection was used (B). All graphs show averages from three independent experiments and are represented by mean  $\pm$  SD. (B) One-way ANOVA with Tukey's multiple comparisons test was used. Statistical comparisons are shown by letters, with bars sharing no matching letters being significantly different. \* = P < 0.05, \*\* = P < 0.01, \*\*\* = P < 0.001, \*\*\*\* = P < 0.0001.

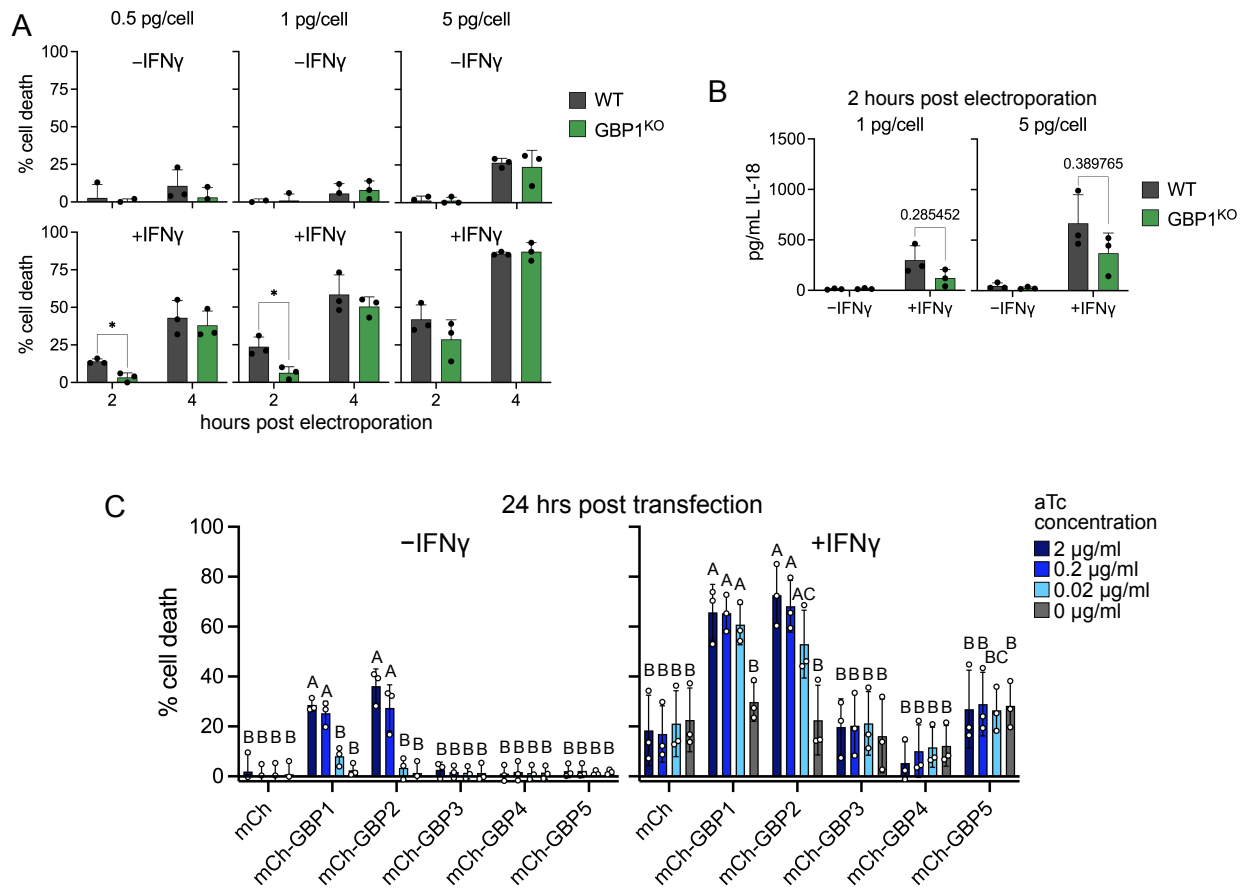

**Figure S10. GBP1 is not required for pyroptosis in response to electroported LPS.**

(A, B) Wildtype and GBP1<sup>KO</sup> A549 cells unprimed or primed with 100 U/ml IFN $\gamma$  overnight were electroported with 0.5 pg/cell, 1 pg/cell, or 5 pg/cell *E. coli* O55:B5 LPS. Cell death was measured using sytox green fluorescence at 2 and 4 hours post electroportation (A). (B) IL-18 secretion was measured in supernatants taken at 2 hours post electroportation. (C) GBP1<sup>KO</sup> A549 cells were transduced with tet-inducible expression vectors and expression of each construct was titrated with different concentrations of anhydrotetracycline (aTc). Cells were unprimed or primed with 100 U/ml IFN $\gamma$  overnight, then transfected with 1  $\mu$ g *E. coli* O55:B5 LPS per well. Cell death was measured using sytox green fluorescence at 24 hours post transfection. All graphs show averages from three independent experiments and are represented by mean  $\pm$  SD. (A and B) Statistical significance was determined using multiple unpaired T tests with Welch correction, with multiple comparisons corrected with Holm-Šidák method. All significant comparisons are shown. \* = P < 0.05. Exact P values are shown in (B) for IFN $\gamma$  primed cells. (C) Statistical significance was determined using two-way ANOVA Tukey's multiple comparisons test. Significance is represented by letters, with bars sharing no matching letters being significantly different.

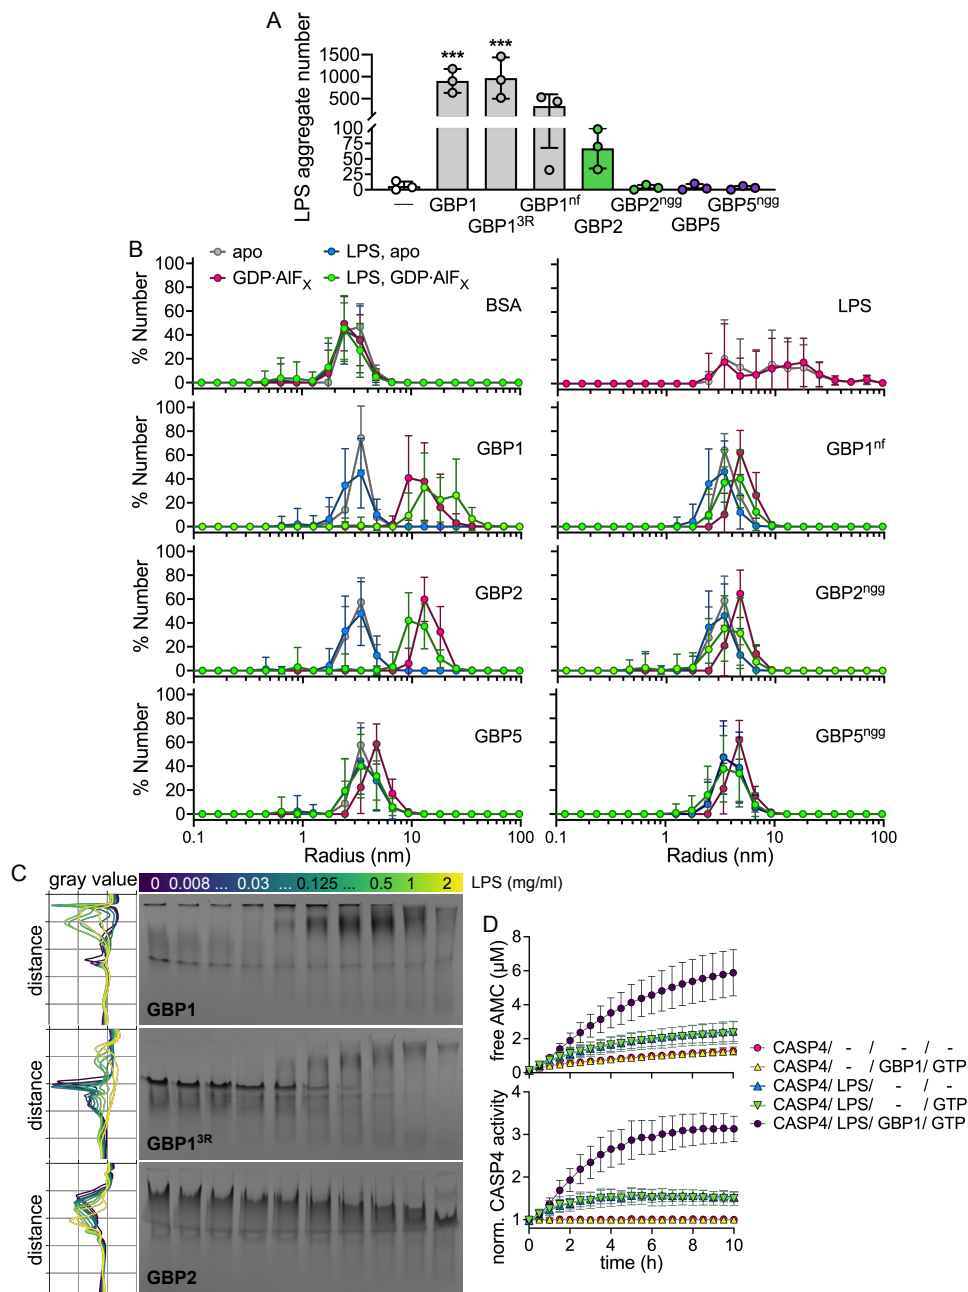

**Figure S11. GBP2 binds directly to LPS and polymerizing GBPs promote caspase-4 activation.** (A) Recombinant isoprenylated and nonisoprenylated GBPs were supplemented with GTP and added to Alexa Fluor 568-labeled *E. coli* O55:B5 LPS. LPS particles were analyzed from different fields of views taken after 20 min with Fiji, and the number of LPS aggregates was plotted. (B) Number-weighted mean radius ( $R_n$ ) of nucleotide-free (apo) or GDP·AIF<sub>x</sub>-bound nonisoprenylated (non-farnesylated - nf, non-geranylgeranylated - ngg) and isoprenylated GBPs in the presence and absence of LPS were determined in DLS experiments. (C) NPAGE of GBP1, GBP1<sup>3R</sup>, and GBP2 titrated with LPS (final concentrations 2 mg/ml to 0.008 mg/ml) supplemented with GDP·AIF<sub>x</sub>. Grey values for each gel lane were plotted with Fiji (GBP1 gel from Fig. 7C). (D) Following mixing of recombinant proteins with *E. coli* O55:B5 LPS in the absence or presence of GTP, protein-LPS complexes were added to recombinant caspase-4, and caspase-4 activity was determined by monitoring release of free 7-Amino-4-methylcoumarin (AMC) upon cleavage of fluorogenic caspase substrate Z-VAD-AMC over time. Fluorescence intensities were either correlated with fluorescence intensities measured for defined AMC concentrations to determine free AMC concentrations upon Z-VAD-AMC cleavage (upper panel), or normalized to basal caspase-4 activities (lower panel). Caspase-4 – CASP4. All graphs show averages from three independent experiments and are represented by mean ± SD. (A) One-way ANOVA with Dunnett's multiple comparisons test comparing to control (no GBP addition) was used. All significant comparisons are shown. \*\*\* = P < 0.001. (C) Representative NPAGEs from three independent experiments are shown.

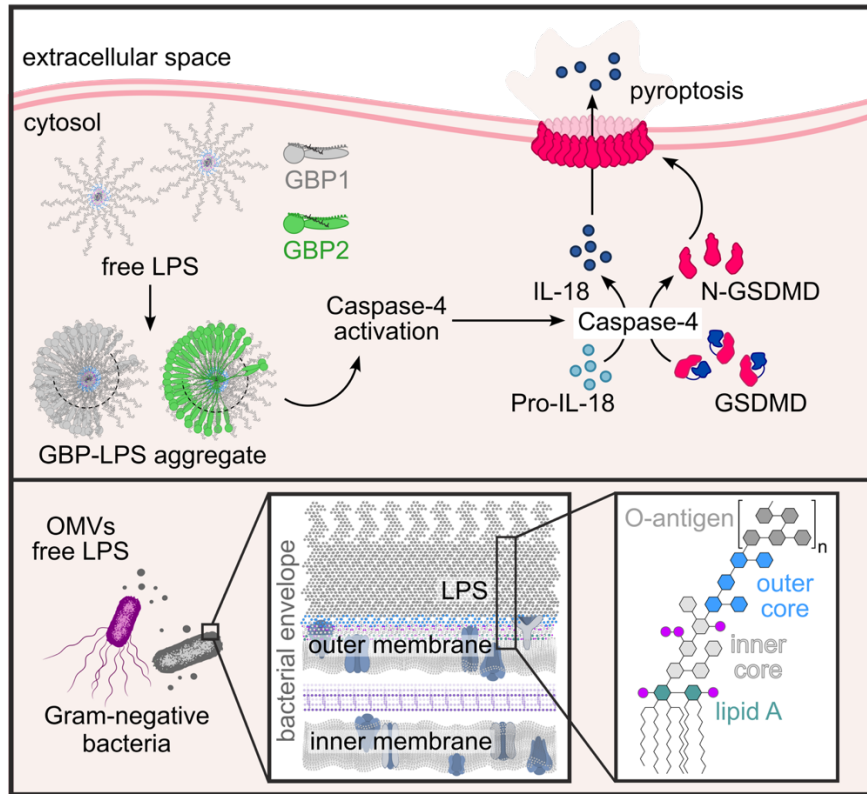

**Figure S12. LPS surfactants GBP1 and GBP2 activate the non-canonical inflammasome in the cytosol without binding to the bacterial surface.** Polymerizing GBP1 and GBP2 aggregate free LPS in the host cell cytosol. GBP1-LPS and GBP2-LPS complexes both enhance caspase-4 activation resulting in IL-18 release and GSDMD-induced pyroptotic cell death, ultimately depleting cytosolic Gram-negative bacteria of their replicative niche.

**Movie S1 (separate file). GBP2 and GBP5 fail to encapsulate bacteria on their own.** Recombinant Alexa Fluor 488-labeled GBP1, GBP2, or GBP5 were supplemented with GTP and added to formaldehyde-fixed RFP-expressing *S. flexneri*.

**Movie S2 (separate file). Both GBP2 and GBP5 associate with bacteria GBP1-dependently but only GBP2 incorporates in the microcapsule.** Recombinant Alexa Fluor 488-labeled GBP1, GBP2, or GBP5 mixed with Alexa-647-labeled GBP1 were supplemented with GTP and added to formaldehyde-fixed RFP-expressing *S. flexneri*.

**Movie S3 (separate file). Pyroptosis of *S. flexneri* does not require GBP1 binding to bacteria.** GBP1<sup>KO</sup> cells primed with 100 U/ml IFN $\gamma$  overnight expressing mCherry (control), mCherry-GBP1, or mCherry-GBP1<sup>3R</sup> (magenta) infected with GFP-expressing *S. flexneri*  $\Delta$ ospC3  $\Delta$ ipaH9.8 (yellow). Dying cells are shown in blue (sytox blue).

Plasmid sequences shown below for GBP overexpression constructs. mCherry shown in red, GBPs in blue, point mutations in green.

>pInducer-mCherry

```
gcacctttgaaatgtaactcatttgggtcaatatgtaatttcagtgtagactagtaattgtccgctaattctggccgttttggctttttgtagacgaagcttggtacc
gagctcggatctccaccccgtagcctcagctcgaattcaccatgtctagactggacaagagcaaaagtcataaacggagctctggaattactcaatgggtgc
ggatcgaaggcctgacgacaaggaactcgtcaaaagctgggagtgagcagcctaccctgtactggcacgtgaagaacaagcgggcccctgctcgatgc
cctgccaatcgagatgctggacaggcatcatacccactctgccccctggaaggcagtgatggcaagacttctgcggaacaacgccaagtcataccgctgt
gctctcctctcacatcgcgacggggctaaagtgcacatcctggcaccggccaacagagaaacagtagcaaaacccctggaaaatcagctcgcgttctctgtcagc
aaggcttctccctggagaacgcactgtacgctctgcccggctggggcactttacactgggctgctgattggaggaacaggagcatcaagtagcaaaagagga
aagagagacacctaccaccgattctatgccccacttctgagacaagcaattgagctgttgcaccggcagggagccgaacctgccttcttctggcctggaact
aatcatatgtggcctggagaacagctaaagtgcgaaagcggcggggcggaccgacgccctgacgattttagcttagacatgctcccagccgatgccctgac
gactttgaccttgatagctgctgctgacgctcttgcgattttgaccttgacatgctccccgggtaactaagtaaggatccggggccgactagaggaattccgc
ccctccccccccccccctaacgttactggccgaagcggcttgaataaggcgggtgctgttctctatgttatttccaccatattgcccgtctttggcaatgtg
agggcccgaaacctggccctgcttctgacgagcattcctaggggtcttccccctctgccaaggaatgcaaggctgttgaatgctgtaaggaagcagttc
ctctggaagcttctgaagacaacaacgctgtgtagcacccttgcaggcagcggaaacccccacctggcgacaggtgctctgcgccaaaagccacgtg
ataagatacacctgcaaaggcggcacaaccccgtagccagctgtgagttgagatgttggaagagtaaatggctctcctcaagcgtattcaacaagggg
ctgaaggatgccagaaggtagccattgtatgggatctgatctggggcctcggtagcactgtttacatggttttagctgaggttaaaaaacgcttaggcccc
cgaaccacggggcagctgggtttcttgaaaaacacgatgataagcttaccggctccaccatgattgaacaagatggattgacgcaggttctccggccgctggg
tgagagggctattcggctatgactgggcacaacagacaatcgctgctctgatgccggctgttccggctgtagcgcagggggcggccggttctttgtcaagac
cgacctgtccgggtccctgaatgaactgcaagacgagcagcggctatcgtggctgcccacgacggcggttcttgcgagctgtgctcgacgttgcactg
aagcgggaaggactggctgctattggcggaagtgcggggcaggatctcctgcatctcaccttgcctcctgcccagaaagtatccatcatggctgatgcaatg
cggcggctgcatagcctgacccgctacctgccattcagaccaccaagcgaacatcgcacgagcagcagcactcggatggaagccgggtctgtcgatc
aggtatgctggacgaagagatcaggggctcgcgccagccgaactgttgcaccaggctcaaggcagatgcccagcggcgaggatctcgtctgacccat
ggcgatgctgcttccgaatatcaggtgaaaaatggcggcttctggattcatgactgtggccggctgggtgtggcggaccgctacaggacatagcgttg
ctaccctgataattgctgaagagctggcggcgaatgggctgaccgctcctcgtgctttacggatcgcggctcccagattcgcagcgcacgcttctatcgccttct
tgacgagttctctgatgtacaagtaagcggcggcgcactctagatcataatcagccataccacattttagaggttttactgtttaaaaaacctcccacacctcc
ccctgaacctgaaacataaaatgaatgcaattgttgttttagtccctcccaattcgatacaagcttatcgcgatagatcctaataacaccttgattacaaaattg
tgaagattgactggtattcttaactatgttgcctttacgctatgtggatacgtgctttaatgctttagatcatgctattgctcccgatggcttcttctcctcctgtg
ataaatcctggttctgtctctttagaggatgttggccggtgtcaggcaactggtggtgctgactgttggctgacgcaacccccactggttggggcagctg
caccacctgacgctccttccggacttcccttccccctcctattgccacgggaactcactcggcctgctgcccgtgctgcccgtgctgacaggggctcggctgtt
gggactgacaattccgtggtgttgcgggaaatcatcgtccttcttggctgctcgcctgttggccacctggattctgcccgggacgtccttctgctacgtccttcc
ggcctcaatccagcggaccttccctcccgccgctgctcgggctcgcggccttcccgcttctcgcctcagacgagtgatcctcctttgggccc
ctccccgctgagatccttaagaccaatgacttacaaggcagctgtagatcttagccacttttaaaagaaaaggggggactggaagggtaattcactccca
acgaagacaagatctgcttttctgtactgggtctctctggttagaccagatctgagcctgggagctctctggtaactagggaaaccactgcttaagcctcaata
aagcttgcctgagtgctcaagtagtgtgtcccgctgtgtgtgactctggttaactagagatccctcagacccttttagtcagtggtgaaaatctctagcagtagta
gttcatgctatctattatcagatattataactgcaaagaaatgaatatcagagagtgagaggccgggttaattaaggaaagggctagatcattctgaagcga
aaggccctcgtgatacgcctattttataggttaatgcatgataataatggttcttagacgctcaggtggcactttcgggaaatgtgcccggaaacccctattgtttat
tttctaaatacattcaaatatgatccgctcatgagacaataacccctgataaatgctcaataatattgaaaaggaagagatgagattcaacatttccgtgctgc
ccttattcccttttggcgcattttgccttctgttttgcaccagaaacgctggtaagtaaaagatgctgaagatcagttgggtgacagagtggttaccatcga
actggatctcaacagcggtaagatccttagagatttcccccgaagaacgcttccaatgatgagcacttttaagttctgctatgtggcgggtattatcccgtgtg
acgcccggcaagagcaactcggctcgcgcatacactattctcagaatgacttgggtgagtagtaccagtcacagaaaagcatctacggatggcatgacagt
aagagaattatgacgtgctgcataacctagtgataacactcggccaacttacttctgacaacgatcggaggaccgaaggagctaaccgctttttgacaca
acatgggggatcatgtaactcgccttgatcgttgggaaccggagctgaatgaagccatacaaacgacgagcgtgacaccacgatccctgtagcaatggca
caacgcttgcgcaaacattatactggcgaactacttactctagcttcccggcaacaattaatagactggatggaggcggataaagttgaggaccacttctgctc
cggccttccggctggctggttattgctgataaatctggagccggtgagcgtgggtctcgcgggtatcattgcagcactggggccagatggaagccctcccgtatc
gtagttatctacacgagcggggagtcaggcaactatggatgaacgaaatagacagatcgcgtgagataggctcctcactgattaaagcattgtaactgtagacca
agtttactcatatatacttttagattgatttaaaactcatttttaatttaaaaggatctaggtgaagatccttttgataatctatgacaaaatcccctaactgagtttctg
ttccactgagcgtcagaccctgagaaaagatcaaaaggatcttctgagatcctttttctgctgctgcaaacaaaaaaaccaccgctaccagc
gggtgttgttccggatcaagagctaccaactcttttccgaaggtaactggctcagcagagcgcagataccaataactgttctctagtgtagccgtagttaggc
caccactcaagaactctgtagcaccgctacatacctcgtctgtaactcctgttaccagtggtgctgcccagtgggataagtcgtgcttaccgggttgactca
agacgatagttaccggataaggcgcagcggctcgggctgaacggggggtcgtgcacacagcccagcttggagcgaacgacctacaccgaactgagatacc
tacagcgtgagctatgaaaagcgcacgcttcccgaagggagaaaggcggacaggtatccggtaagcggcagggtcggaaacaggagagcgcacag
ggagaaacccaggggaaacgcctggtattctttagctctgctgggttccaccctcagctgactgagcgtcgtattttgtgatcctgcagggggcggagcctatg
gaaaaacgcggcaacgcggccttttaccggttctggtccttggccttctcactatgttcttctgctgctatcccctgattctgtgataaccgtattaccgct
ttgagtgagctgataccgctcgcgcagcgaacgacgagcgcgagtgagcagtgagcaggaagcggaaagagcggcaataacgcaaacccgctctcc
ccgcgcttggccgattcattaatgcagcaagctcatggctgactaaattttttattatgcagaggccgagccgctcggcctctgagctattccagaagtagt
aggaggctttttggaggcctaggcttttcaaaaagctccccgtggcagcagaggttcccgactggaaagcgggcagtgagcgaacgcaatattatgtgag
tagtctactcattaggcaccaccaggctttacactttatgcttccggctcgtatgtgttggaaattgtgagcggataacaatttcacacaggaaacagctatgacatg
```



attacgaattcacaataaagcatttttctactgcattctagttgtggttgcctcaaacatcaatgatcttatcatgtctggatcaactggataactcaagtaacc  
aaaatcatcccaactcccacccataccctattaccactgccaattacctgtggttcttactctaaacctgattcctctgaatttttcattttaagaaattgt  
atttgttaaatatgtactacaaactagtagttggaagggttaattcactcccaagaagacaagatatcctgatctgtgattaccacacacaaggctactccc  
tgattagcagaactacacaccagggccaggggtcagatatccactgaccttggatggtctacaagctagtaccagttgagccagataaggtagaagaggc  
caataaaggagagaacaccagcttgttacacctgtgagcctgcatgggatggatgacccggagagagaagtgttagagtgagggttgcagccgcttagc  
atftcatcagtgcccgagagctgcatccggagtacttcaagaactctgatatcgagcttgcactacaagggacttccgctggggacttccagggagggcgtg  
cctgggaggactgggagtgccgagccctcagatcctgcatataagcagctgcttttgcctgtactgggtctctctggttagaccagatctgagcctgggagct  
ctctggctaactagggaaaccactgcttaagcctcaataaagcttgctttagtgctcaagtagtgctgcccgtctgtgtgactctggtaactagatcctc  
agacccttttagtcagtggtgaaaatctctagcagtgccgcccgaacagggacttgaagcgaagggaaccagaggagctctctcgacgcaggactcgg  
ctgtgtaagcgcgcacggcaagaggcagggggcggcgactggtgagtacgcaaaaaattttagctagcggaggctagaaggagagagatgggtgagag  
agcgtcagtagtaagcgggggagaattagatcgcgatgggaaaaaattcggttaaggccaggggaaagaaaaatataaataaaacatagtagtggc  
aagcagggagctagaacgattcgcagttaatcctggcctgttagaaacatcagaaggctgtagacaaactgggacagctacaacctccctcagacagg  
atcagaagaactagatcattataatacagtagcaacctctattgtgtcatcaaaggatagagataaaagacaccaaggaagctttagacaagatagag  
gaagagcaaaaacaaagtaagaccaccgcacagcaagcggccggcgtgatctcagacctggaggaggagatagagggacaattggagaagtga  
ttataaataataaagtagtaaaaattgaaccattaggtagcaccaccaaggcaagagaagagtggtgcagagagaaaaagagcagtggaatag  
gagcttggcttctgggtcttgggagcagcaggaagcactatgggcccagcgtcaatgacgctgacggtacaggccagacaattattgtctgtatagtgacg  
agcagaacaatttctgagggctattgagggcgaacagcatctgttgaactcagctggtgggatcaagcagctccaggcaagaatcctggctgtggaag  
atacctaaaggatcaacagctcctgggattggggtgctctggaaaactcatttgcaccactgctgtgcttggatgctagtggagtaataaatctctggaac  
agatttgaatcacacgacctggatggagtgggacagagaaataacaattacacaagcttaatacctccttaattgaagaatcgaaaaaccagcaagaaa  
agaatgaacaagaattattggaattagataaattgggcaagtttgggaattggttaacataacaaattggctgtggtatataaaatattcataatgatagtaggag  
gcttggtaggttaagaatagttttgctgtactttctatagtaatagagtaggacgggatattcaccattatcgttcagaccacctccaaccccgaggggacc  
cgacaggcccgaaggaatagaagaagaaggtggagagagagacagagacagatccattcgattagtgaaacggatctcgacggatcgccgaattcaca  
atggcagtagtattccacaattttaaagaaaaaggggattgggggtacagtgacggggaagaatagtagacataatagcaacagacatacaactaa  
agaattacaaaaacaaattacaaaaattcaaaatttccgggttattacagggacagcagagatccagtttggactaggatcctttaccactccctatcagtgatag  
agaaaagtgaagtcgagtttaccactccctatcagtgatagagaaaagtgaagtcgagtttaccactccctatcagtgatagagaaaagtgaagtcgagtt  
taccactccctatcagtgatagagaaaagtgaagtcgagtttaccactccctatcagtgatagagaaaagtgaagtcgagtttaccactccctatcagtgata  
gagaaaagtgaagtcgagtttaccactccctatcagtgatagagaaaagtgaagtcgagtcggtaccgggctgaggtaggcgtgacgggtgggagggc  
tataaagcagagctggttagtaaccgtcagatcgctggagagccatccacgctgttttagacctcagatagaagacaccgggaccgatccagctccgagg  
ccccgaactagtcagtggtggaattctgcagatcaACAAGTTTGTACAAAAAAGCAGGCTgccaccatggtgagcaagggcgaggag  
gataacatggccatcaaggagttcagcttcaaggtgcacatggagggctcctgtaaccggccagagttcgagatcgagggcgagggcgagggcgagggcgg  
ccccacagggccaccagaccgccaagctgaaggtgaccaaggggtggccctgcccctgctgctgggacatcctgtcccctcagttcatgtacggctcaag  
gcctacgtgaagcaccggcagatccccgactacttgaagctgcttccccgagggctcaagtgaggagcgtgatgaactcgaggacggcggtg  
gtgaccgtgaccagggactcctcctgcaggacggcgagttcatctacaaggtgaagctgctgagggcaccactccctccgacggccccgtaatgcagaag  
aagaccatgggctgggagggcctcctcgagcggatgtacccgaggacggcgccctgaaggcgagatcaagcagaggtgaagctgaaggacggcgg  
ccactacgacgctgaggtcaagaccactacaaggccaagaagcccgtgagctgcccggcgctacaacgtcaacatcaagttggacatcacctcccac  
aacgaggactacaccatcgtggaacagtagcaacgcgcccagggccgcaactccaccggcgcatggacgagctgtacaagtcgggactcAGATCTC  
GAGCTCAAGCTTCGAATTCTGCAGTCGACGGTACCGCGGGCCCGGGATCCATCGGATCTAGAtaaGACCCAG  
CTTTCCTGTACAAAGTggttataccagcacagtgccggcgcctcagctagagggcccgggtcgaataaccatacagcgtcccagactacgct  
tagtaatgattaataaactagaaattctaccgggtaggggagggcgttttccaaggcagctggtgagtaaccacccaagatctggcctccgcccgggtttgg  
cgctcccggggcgccccctcctcacggcgagcgtccacgctcagacgaagggcgagcagcgtcctgatccttccgcccggagcgtcaggacagc  
ggcccgtgctcataagactcggccttagaaccacagatcagcagaaggacattttagcagggacttgggtgactctagggcactggtttcttccagagag  
cggaacaggcgaggaagtagtcccttctcggcgattctcggagggatcctcgtggggcgtgacgcccgatattatataaggacgcgcccgggtgtggc  
acagctagtccgtcagccgggatttgggtcgggtctgtttgtggatcgctgtatcgtcacttggtagtagcgggctgctgggctggccggggcttctggt  
ccgcccggcgtcgtgggacggaagcgtgtggagagaccgcaagggctgtagtctgggtccgagcaaggttccctgaactgggggttgggggga  
gcgagcaaaatggcggctgtcccagcttgaatggaagacgctgtgaggcggcgtgtgaggtcgttgaacaaggtgggggcatggtggcgca  
gaaccaaggtcctgaggccttcgtaatcgggaaagcttattcgggtgagatgggctggggcaccatctggggaccctgacgtgaagttgtcactgactg  
gagaactcggtttgcgtctgttgcggggcgagttatggcgggtcgggtggcagtgacccgtaccttgggagcgcgcgcccctgctgtctgtcgtgacgtca  
cccgttctgttgctataatgacgggtggggccacctgccggtaggtgtgcggtaggcttttccgctcagggacgcaggggtcgggctagggtaggctcct  
gaatcgacaggcgggacctcgtgaggggagggataagtgaggcgtcagtttctgtgctggtttatgtacatcttctaagtagctgaagctccggtttga  
actatgcgctcggggtggcgagtggtttgtgaagtttttag

>pInducer-mCherry-GBP1

cgagtgggtacatcgaactgatctcaacagcggtaagatccttgagagtttgcggcgaagaacggtttccaatgatgacactttaaagttctgctatgtggc  
gctgtattatcccgtgtgacgcgggcaagagcaactcggctcgcgcatacacttctcagaatgacttgggtgactactaccagtcacagaaaagcatctt  
acggatggcatgacagtaagagaattatgacgtgctgcataacctagtgataaactcggccaacttactctgacaacgatcggaggaccgaaggag  
ctaaccgctttttgcacaacatgggggatcatgtaactcgccttgatcgttggaaaccggagctgaatgaagccatacacaacgacgagcgtgacaccagat  
gcctgtagcaatggcaacaacggttgcgcaaaactattaactggcgaactcttactctagcttccggcaacaataatagactggatggagcgggataaagttgc  
aggaccacttctgcgctcggccctcgggtggttattgctgataaactggagccggtgagcgtgggtctcgcggtatcattgacgactggggccagat  
ggtaagccctcccgtatcgtattatctacacgacggggagtcaggcaactatggatgaacgaaatagacagatcgtgagataggtcctcactgattaagc

attgtaactgtcagaccaagttactcatatatactttagattgattaaaacttcatttttaattaaaaggatctaggtgaagatccttttgataatctcatgaccaa  
atccctaacgtgagtttctgaccctgagcgtcagaccccgtagaaaagatcaaaggatcttctgagatcctttttctgctgtaatctgctgcttgaacaaa  
aaaaccaccgctaccagcgggtgttggccggatcaagagctaccaactctttccgaaggtaactggcttcagcagagcgcagataccaaactgttcttc  
tagttagccgtagtttagccaccactcaagaactctgtagcaccgctacatacctcgtctgtaatcctgttaccagtggtgctgcccagtgccgataagtcg  
tgtctaccgggttgactcaagacgatagttaccggataaggcgcagcggctgggtgacgggggttcgtgacacagcccagcttgagcgaacgcag  
tacaccgaactgagatacctacagcgtgagctatgagaaagcggcaccgctcccgaagggagaaagggcggacaggtatccggtaagcggcagggctcga  
acaggagagcgcacgagggagctccaggggaaacgcctggtatctttagtctgctgctgggttcgccacctctgactgagcgtgattttgtgctgct  
agggggcgagcctatgaaaaacgccagcaacgcggcctttacggttcctggcctttgctgctttgctcacatgttcttctgctgattcccctgattctg  
ggataaccgtattaccgctttgagtgagctgataccgctcggcagccgaacgaccgagcgcagcagagtcagtgagcgggaagcgggaagagcggcca  
atagcgaaccgctctccccgcgcttgccgattcattaatgacgaagctcatggctgactaattttttattatgacagaggccgaggccgctcggcctctg  
agctattccagaagtagtgaggaggccttttggaggcctaggcctttgcaaaaagctccccggtggcagcaggtttcccagctggaagcgggagtgagc  
caacgcaattaatgtgagttagctcactcattaggcaccaccaggcctttacactttatgctccggctcgtatgtgtggaattgtgagcggataacaattcacaca  
ggaaacagctatgacatgattacgaattcacaaataaagcatttttctcgtcattctagttgtggtttgcaaaactcaatgtatcttcatgctggtatcaact  
ggataactcaagtaacaaaatcatccaaactcccaccataccttaccactgccaattacctgtggttcttactctaaacctgtgattcctctgaatta  
ttttcttttaagaattgtattgttaaatatgtactacaacttagttagttggaaggcctaattcactccaaagaagacaagataccttcatctgtggtatcca  
cacacaaggctactccctgattagcagaactacacaccaggccagggtcagatatcactgacctttggatggtgctacaagctagtagaccagtgagccag  
ataaggtagaagaggccaataaaggagagaacaccagctgttacacctgtgagcctgcatgggatggatgcccggagagagaagtgtagagtgagg  
gtttgacagccgctagcattcatcagctggccgagagctgcatccggagcttcaagaactgctgatatcgagctgctacaagggacttccgctggggac  
ttccaggaggcgtggcctggcgggactgggagtgggagccctcagatcctgcatataagcagctgttttgcctgtactgggtctctggttagaccag  
atctgagcctgggagctctcggtaactagggaaaccactgcttaagcctcaataaagctgcttgagtgctcaagtagtgctgcccgtctgtgtgactctg  
gtaactagagatcctcagacccttttagtctggtgaaaatcttagcagtggtggcggcccgaacagggactgaaagcgaaggggaaaccagaggagctct  
cgacgcaggactcggctgtgaagcgcacggcaagaggcgagggcgggcagctggtagtacgcaaaaaatttgactagcggagggtagaaggag  
agagatgggtgcgagagcgtcagtttaagcgggggagaattagatcgcgatgggaaaaattcggtaaggccaggggggaaagaaaaataaattaa  
aacatatagtatgggcaagcaggagctagaacgattcgcagttatcctggcctgttagaaacatcagaaggcttagacaaactgggacagctacaac  
catccctcagacaggatcagaagaacttagatcattataataacagtagcaaccctctattgtgtgcatcaaggatagagataaaagacaccaaggaagct  
ttagacaagatagaggaagagcaaaacaaaagtaagaccaccgcacagcaagcggccggcctgctcagacctggaggaggagatagagggac  
aattggagaagtgaaatataaataaagtagtaaaaattgaaccattaggagtagcaccaccaaggcaagagaagagtggtgcagagagaaaaaa  
gagcagtgggaaataggagcttcttctgggtcttgggagcagcaggaagcactatgggcgcagcgtcaatgacgctgacggtaacggccagacaattatg  
tctgtatagtgacgacagaacaatttctgagggctattgagggcaacagcactgttgaactcagctggtgggcatcaagcagctccagtggaagaat  
cctggctgtgaaagatacctaaaggatcaacagctcctgggatttggggtgctctggaactcatttgcaccactgtgctgcttggacttggacttggatg  
ataaatctctggaacagatttgaatcacacgacctggagtgaggagaaatcaactacagaagcttaatacactccttaattgaagaatcgcaa  
aaccagcaagaaaagatgaacaagaatttggaaatagataaattgggcaagtttggaaattggttaacataacaaattggctgtggtatataaaatttcat  
aatgatagtaggagcctggtaggttgaagaatagtttctgctacttctatagtagaataagtagtaggcagggatattcaccattatcgttccagaccacctccaa  
ccccgaggggaccgacaggccgaaggaatagaagaagaaggtggagagagagacagagacagatcattcagattagtaacggatctcagcggat  
cgccgaattcacaatggcagttatccacaattttaaagaaaagggggattgggggtacagtgacggggaagaatagtagacataatagcaaca  
gacatacaactaaagaattacaaaaacaaattacaaaaattcaaaatttctgggttattacagggacagcagagatccagtttgactaggtatcctttaccct  
ccctatcagtgatagagaaaagtgaagtcgagtttaccactccctatcagtgatagagaaaagtgaagtcgagtttaccactccctatcagtgatagagaaa  
agtgaagtcgagtttaccactccctatcagtgatagagaaaagtgaagtcgagtttaccactccctatcagtgatagagaaaagtgaagtcgagtttaccac  
tccctatcagtgatagagaaaagtgaagtcgagtttaccactccctatcagtgatagagaaaagtgaagtcgagctcggtagccgggtcaggttagcgtgt  
acgggtgggagcctatataagcagagctcgttagtgaaaccgctagatcgctggagcgcctaccacgctgtttgacctcatagaagacaccgggaccga  
tccagcctccgcccgaactagctcagtggtggaattctgcagatatcaACAAGTTTGTACAAAAAAGCAGGCTgccaccatgggtgag  
caagggcgaggaggataacatggccatcatcaaggagttcatgcgttcaaggtgcacatggagggtcctgtaacggccacaggttcgagatcaggggc  
gagggcgagggccgcccactcagagggcaccagaccgccaagctgaaggtgaccaaggggtggcccctgccctcgcctgggacatcctgtcccctcagtt  
catgtacggctccaaggctacgtgaagcaccgcccagatccccgactactgaagctgcttcccggagggttcaagtgaggagcgcgtgatgaactcg  
aggacggcggcgtggtgaccgtgaccaggactcctcctgcaggacggcgagttcatctacaaggtgaagctgcgcccacccaactcccctcggagcgc  
cccgtaatgcagaagaagaccatgggctgggaggcctcctccgagcggatgaccccaggagcggcgcctgaagggcgagatcaagcagaggctgaa  
gctgaaggacggcggcactacgacgctgaggtcaagaccacctacaaggccaagaagcccgtgcagctgcccggcgtacaacgtcaacatcaagtt  
ggacatcactcccacaacgaggactacaccatcgtggaacagtagcaacgcgcggagggccgcccactccaccggcggcatggacgagctgtaagtc  
cggactcAGATCTATGGCATCAGAGATCCACATGACAGGCCAATGTGCCTCATTGAGAACACTAATGGGCGAC  
TGATGGCGAATCCAGAAGCTCTGAAGATCCTTTCTGCCATTACACAGCCTATGGTGGTGGTGCAATTGTGG  
GCCTCTACCCACAGGCCAAATCCTACCTGATGAACAAGTGTGCTGGAAGAAAAAGGGCTTCTCTGGCT  
CCACGGTGCAGTCTCACACTAAAGGAATCTGGATGTGGTGTGTGCCCCACCCAAAGAAGCCAGGCCACATC  
CTAGTTCTGCTGGACACCGAGGGTCTGGGAGATGTAGAGAAGGGTGACAACCAGAATGACTCCTGGATCTT  
CGCCCTGGCCGTCCTCCTGAGCAGCACCTTCGTGTACAATAGCATAGGAACCATCAACCAGCAGGCTATGG  
ACCAACTGTAATGTGACAGAGCTGACACATAGAATCCGATCAAAATCCTCACCTGATGAGAATGAGAATGA  
GGTTGAGGATTCAGCTGACTTTGTGAGCTTCTTCCCAGACTTTGTGTGGACTGAGAGATTTCTCCCTGGA  
CTTGGAAAGCAGATGGACAACCCTCACACCAGATGAGTACCTGACATACTCCCTGAAGCTGAAGAAAGGTAC  
CAGTCAAAAAGATGAAACTTTTAACTGCCAGACTCTGTATCCGGAAATTTCTCCAAAGAAAAAATGCTTT  
GTCTTTGATCGGCCCGTTACCCGCAGGAAGCTTGCCAGCTCGAGAACTACAAGATGAAGAGCTGGACCC

CGAATTTGTGCAACAAGTAGCAGACTTCTGTTCTACATCTTTAGTAATTCCAAAACACTAAAACCTTTTCAGGAG  
GCATCCAGGTCAACGGGCCTCGTCTAGAGAGCCTGGTGCTGACCTACGTCAATGCCATCAGCAGTGGGGAT  
CTGCCGTGCATGGAGAACGCAGTCCTGGCCTTGGCCAGATAGAGAACTCAGCTGCAGTGCAAAAAGGCTAT  
TGCCCACTATGAACAGCAGATGGGCCAGAAGGTGCAGCTGCCACAGAAAGCCTCCAGGAGCTGCTGGACC  
TGCACAGGGACAGTGAGAGAGAGGCCATTGAAGTCTTCATCAGGAGTTCTTCAAAGATGTGGACCATCTAT  
TCAAAGGAGTTAGCGGCCAGCTAGAAAAAAGCGGGATGACTTTTGTAAACAGAATCAGGAAGCATCAT  
CAGATCGTTGCTCAGGTTTACTTCAGGTCATTTTAGTCTCTAGAAGAAGAAGTGAAGGCGGGAATTTATTC  
GAAACCAGGGGGCTATCGTCTCTTTGTTTTCAGAAGCTACAAGACCTGAAGAAAAAGTACTATGAGGAACCGAG  
GAAGGGGATACAGGCTGAAGAGATTCTGCAGACATACTTGAATCCAAGGAGTCTATGACTGATGCAATTCT  
CCAGACAGACCAGACTCTCACAGAAAAAGAAAAGGAGATTGAAGTGAACGTGTGAAAGCTGAGTCTGCACA  
GGCTTCAGCAAAAATGTTGCAGGAAATGCAAAGAAAAGTGAAGTGAACAGATGATGAAACAGAAAGGAGAGGAGTTA  
TCAGGAACACTTGAACAACACTGACTGAGAAGATGGAGAACGACAGGGTCCAGTTGCTGAAAGAGCAAGAGA  
GGACCCTCGCTCTTAACTTCAGGAACAGGAGCAACTACTAAAAGAGGGATTTCAAAAAGAAAAGCAGAATAAT  
GAAAAATGAGATACAGGATCTCCAGACGAAAATGAGACgacgaaagcatgtaccataagctaaGACCCAGCTTTCTTG  
TACAAAGtggtgatatccagcacagtgggcgccgctcagtgtagagggcccggttgaataccatacagcgtccagactacgcttagtaatgatta  
atataactagaaattctaccgggtaggggagggcgctttcccaaggcagctcggagtaaccaccaagatctggcctccgcccgggctttggcgctcccgc  
ggcgccccctcctcacggcgagcgtgccacgtcagacgaagggcgagcagcgtcctgatcctccgcccggagcgtcaggacagcggcccgtgc  
tcataagactcggccttagaacccagatcagcagaaggacatttaggacgggacttgggtgactctagggcactggtttctccagagagcggaaacggc  
gaggaaaagtagtccctcctcggcgattctcggagggatctccgtggggcggtgaacgccgatgattatataaggacgcgcccgggtgaggacagctagtcc  
gtcgcagcccgggattgggtcgcggttctgtttgtggtatcgctgtgatcgtcacttgggtgagtagcgggctgctgggctggccgggcttctgctggcggcc  
gctcgggtgggacggaagcgtgtggagagacgccaagggcgttagtctgggtccgagcaaggttgcctgaactgggggtggggggagcgcagcaaa  
atggcggctgttcccagcttgaatggaagacgcttctgagggcgggctgtgaggtcgttgaacaaggtggggggcatggtggcggaagaaccaagg  
ctttaggccttcgctaatacgggaaagcttattcgggtgagatgggctggggcaccatctggggaccctgacgtgaagttgtactgactggagaactcgggt  
tgtcgtctgttggggggcggcagttatggcgggtccgttggcagtgacccgtaccttgggagcgcgcgccctcgtcgtgacgtcacccttctgttgg  
cttataatgcaggggtggggccacctcgggtaggtgtgcggtaggcttttcccgctgcaggacgcaggggtcgggctagggtaggctctcgaatcgacagg  
cgccggacctcgtgaggggagggataagtgagggcgtcagtttcttggcggtttatgtacctatcttctaagtagctgaagctccggtttgaaactatgcgctc  
gggtggcagtggttttgaagtttttagccaccttgaatgtaatacttgggtcaatataatgtaattttagttagactagaaattgcccgtaaattctggcgt  
tttggctttttagtagcaagcttggtagcagctcggatctccaccccgtagcgtcgaattcaccatgctagactggacaagagcaaatgata  
aacggagctctggaattactcaatggtgtcgtatcgaaggcctgacgacaaggaactcgtcacaagctgggaggtgagcagctaccctgactgagcag  
tgaagaacaagcgggcccctgctcagtgccctgcaatcgagatcgtgacagggcactatacccaactctgccccctggaagggcagctatggcaagacttct  
gcggaacaacggcaagctacaccgctgtcctcctcaccatcgcaggggctaaagtgcatctcggcaccgccaacagagaaacagtagcaaaacc  
tggaaaatcagctcgcgttctgtgtcagcaaggcttccctggagaacgcactgtacgcctgtcgcggctgggcccactttactggtgctgtattggagga  
acaggagcatcaagtagcaaaagaggaaagagagacacctaccaccgattctatgccccactctgagacaagcaattgagctgttgcaccggcagggga  
gcccgaacctgccttcttggcctggaactaatcatatgtggcctggagaacagctaaagtgcgaaagcggcgggcccagccagcgccttgcagatttga  
cttagacatgctcccagccgatgccctgacgactttgacctgatatgctgctcgtgacgctctgacgattttgacctgacatgctccccgggtaactaagtaag  
gatccgcccggcactagaggaattccgcccctccccccccccccctaacgttactggcgaagccgcttgaataaggccgggtgctgcttctatattgt  
atlttccaccatattgccgttttggcaatgtgagggcccggaaacctggcctgtcttctgacgagcattcctaggggtcttccccctcgcctaaaggaatgcaa  
ggctgttgaatgctggaaggaagcagttcctctggaagcttctgaagacaacaacgtctgtagcagcccttgcaggcagcgaacccccacctggcga  
caggtgctctcggccaaaagccacgtgtataagataacctgcaaaaggcggcacaaccccagtgccacgttggatgatttggaaagagtgcaa  
atggctctcctcaagcgtattcaacaaggggctgaaggatgccagaaggtacccattgtatgggatctgatctggggcctcgggtgacatgctttacatggtt  
agtcgaggttaaaaaacgtctaggcccccgaaaccacggggacgtggttttcttgaaaaacacgatgataagctaccggtccaccatgattgaacaagat  
ggattgcacgcaggttctccggcggctgggtggagaggctattcggctatgactgggcacaacagacaatcggctgctcgtatgccgcccgttccggctgca  
gcgagggggcggccggcttcttctgcaagaccgacctgcccgtgcccgaatgaactgcaagacgagcagcggcgtatcgtgctggccacgacgggc  
gttccctgcccagctgtgctgacgttgcactgaagcgggaaggactggctgctattgggcaagtgccggggcaggatctcctgctatctcacttgcctcgtc  
cgagaaagatccatcatggtgtagcaatgcggcggctgcatacgttgcctgacccgctaccctgcccattcgaccaccaagcgaacatcgcatcgagcagc  
acgtactcggatggaagccggcttctgcatcaggatgatctggacgaagagcatcaggggctcgcgcccagccgaactgttccagggtcaaggcagcat  
gcccagcggcagggatcctcgtgacccatggcgtgcttgcgcaatcatggtggaaaatggccgcttttctggattcatcagactgtggccggctgggt  
gtggcggaccgctacaggacatagcgttggctacccgtgatattgctgaagagcttggcggcgaatgggctgaccgcttctcgtctttacggatcgcgctc  
cgattcgcagcgcagccttctatcgccttctgacgagttctctgatgtacaagtaaagcggccgactctagatcataatcagccataaccattttagag  
gttttacttgccttaaaaaacctcccacacctccccgaacctgaaacataaaatgaatgcaattgttgttttagtccctccaattcgatcaagcttatcgcgat  
agatcctaatacaacctggtattcaaaaatttgaagattgactggattcttaactatgttgccttttacgctatggatacgtgcttaaatgctttgatcatgc  
tattgctcccgtatggcttcttctcctctgtataaactcgtgtgtcctttagaggagttgtggcccgttgcaggcaacgtggcgtggtgtgactgtgttgg  
ctgacgcaacccccactggttgggcaattgccaccacctgtcagatccttccgggacttccgcttccccctccctattgccagggcgaactcatcgcgcccgtc  
cttgcggcgggagctcctctcactcgtccctcggccctcaatccagcggaccttctcggcggcctcgtcggcggcctcctcggcgtctcctcggcgtctc  
ccctcagacgagctcggatccttggggcggcctccccgctgagatcctttaaagaccaactacaaggcagctgtagatcttagccactttttaaagaaa  
aggggggactggaagggtaattcactcccaacgaagacaagatctgcttttctgactgggtctctggttagaccagatctgagcctgggagctcctggc  
taactagggaaacctgcttaagcctcaataaagcttgccttagtctcaagtagtgtgcccgtctgtgtgactctgtaactagagatccctcagacc  
tttagtcagtggtgaaaatcttagcagtagtagtctatcttattcagtagttataactgcaaaagaaatgaatatcagagagtgagaggcccgggttaatt

aaggaaagggctagatcattctgaagacgaaagggcctcgtgatacgcctatTTTTataggttaatgtcatgataataatggttcttagacgtcaggtggcactttt  
cggggaaatgtgCGCGgaacccctatTTTtatttttctaaatacatcaaatatgtatccgctcatgagacaataaccctgataaatgttcaataatattgaaaa  
ggaagagtatgattcaacattccgtgCGccctattccctTTTTgCGGCattttgctcctgTTTTgctcaccgaaacgctggtgaaagtaaaagatgctga  
agatcagttgggtgca

>plInducer-mCherry-GBP2

ggtgcacgagtggttacatcgaactggatctcaacagcggtaagatccttgagagtttgcCCCGaagaacgTTTTcaatgatgagcactTTaaagtctgct  
atgtggcCGgtattatccCGTgtgacgCCGGcaagagcaactCGgtCGCCcatacactattctcagaatgacttggtgagctcaccagtcacagaaaa  
gcatctacggatggcatgacagtaagagaattatgcagtgctGCCataaccatgagtgataaacactcggccaacttactctgacaacgatcggaggaccga  
aggagctaaccgctTTTTgcacaacatgggggatcatgtaactcgccttgatcgttgggaaccggagctgaatgaagccataccaaacgacgagcgtgacac  
cacgatgctgtagcaatggcaacaacgTTgcgcaactattaactggcgaacttactctagcttccCGcaacaattaatagactggatggaggcggata  
aagttgcaggaccactctgCGctCGccctccgctggttatttgcgataaatctggagccggtgagcgtgggtctcCGgtatcattgcagcactgggg  
ccagatggaagccctccCGtatcgtattctacacgacggggagtcaggcaactatggatgaacgaaatagacagatcgtgagataggtcctcactgat  
taagcattggaactgtcagaccaagttactcatatactttagattgattaaaactcatttttaaaaggatctagggaagatcctTTTTgataatctcatgac  
caaaatcccttaacgtagtttcttccactgagcgtcagaccccgtagaaaagatcaaaggatcttctgagatcctTTTTctgCGcgaatctgctgctgcaaa  
caaaaaaccaccgctaccagcgggtggttTTgCCGGatcaagagctaccaactTTTTcgaaggttaactggctcagcagagcgcagataccaaact  
gttctctagtgtagccgtagttagccaccactcaagaactctgtagaccCGctacatacctCGctctgtaactcctgttaccagtggtgctgCCagtgccgat  
aagcgtgcttaccgggttgactcaagacgatagttaccggataagggcgcagcggcgggctgaacggggggtcgtgCACacagcccagcttgagcga  
acgactacaccgaactgagatacctacagcgtgagctatgaaagcGCCacgctccCGaagggagaaaggCGgacaggtatccGGtaagCGgCagg  
gtCGgaacaggagagcgcacgaggggactccaggggaaacgCctggtatctttagtctgCGggttCGccactctgacttgagcgtcattttgtgatg  
ctcgtcaggggggCGgagcctatggaaaaacGCCagcaacCGcctTTTTacggtcctgCCctttgctgCGcctttgctcactgcttcttctgCGttatccCGt  
attctgtgataaccgattaccgctttagtgagctgataccgctCGCCgacCGgaacgaccgagcgcagcagtgactgagcgggaagCGgaagag  
CGccaatacGcaaacCGcctcCCCGcCGgttggccgatcattaatgcagcaagctcatggctgactaatttttattatgcagaggccgaggCGcctCG  
gcctctgagctattccagaagtagtgaggagcTTTTggaggcctaggcctttgcaaaaagctccCGtgGCacgacaggttccCGactggaaagCGggcag  
tgagCGcaacGcaattaatgtgagttagctcactcattaggcaccCGccttactttatgctcCGgctcgtatgttGTggaattgtgagcggataacaatttc  
acacaggaaacagctatgacatgattcgaattcacaataaagcatttttactgactcattctagttggttGTcCAAactcaatgtatctatcatgctggt  
caactggataactcaagctaaccaaaatcatccaaactcccaccataccttaccactgccaattactgtggttacttactctaaacctgtgattcctct  
gaatttttcaTTaaagaattgtattgttaaatagtactacaacttagtagttgaagggtaattcactcccaagaagacaagatcctgtatctggtgat  
ctaccacacaaggtacttccctgattagcagaactacacaccagggccaggggtcagatccactgaccttggatggtgctacaagctagtagaccagttg  
agccagataaggtagaagggcaataaaggagagaacaccagcctgtttacccctgtgagcctgcatggatggatgaccCGgagagagaaggtgtaga  
gtggaggttgacagCCcctagcattcaacgctgCCCGcagagctgcatccggagctcaagaactgctgatatcgagctgctacaagggacttccgct  
ggggacttccagggaggcgtgCCtgggCGgactgggagtgCGagccctcagatcctgcatataagcagctgctTTTTgCctgactgggtctctcgtgta  
gaccagatctgagcctgggagcctctgGtaactagggaaaccactgGtaagcctcaataaagcttgccttgagtgctcaagtagtGTgCCcctgctgtgtg  
gactctgtaactagagatccctcagacccttttagtcagtggtgaaatctctagcagtgCGCCCGaacagggactgaaagCGaaagggaaaccagagg  
agctctcgcacgagcaggactcggctgctgaagcgcgcacggaagaggCGaggggCGgactggtgagtagcCCaaaaattttagctagcggaggctag  
aaggagagagatgggtgCGagagcgtcagttaaagCGggggaattagatcCGgatgggaaaaattCGgttaaggccagggggaaagaaaaaatat  
aaattaaaacatagtagtggaagcagggagctagaacgattcgcagttaatcctggcctgttagaaacatcagaaggctgtagacaaactgggacag  
ctacaacctccctcagacaggatcagaagaacttagatcattatataacagtagcaaccctctattgtgcatcaaaggatagagataaaagacaccaa  
ggaagcttagacaagataggaagagcaaaacaaagtaagaccaccgacagcaagCGCCCGcctgatctcagacctggaggaggagat  
gagggacaattggagaagtgaaatataaaatagaagtagtaaaattgaaccattaggagtagcaccaccaaggcaagagaagagtggtgacagaga  
gaaaaagagcagtggaataggagcttGTccttgggtcctgggagcagcaggaagcactatgggCGcagcgtcaatgacgctgacggtacaggccaga  
caattattgctggtatagtcagcagcagaacaattgtgagggctattgaggcgaacagcatcgttGcaactcacagctgtgggcatcaagcagctccag  
gcaagaatcctggctgTgaaagatacctaaaggatcaacagctcctgggatttggggtgctctgGaaaactattgaccactgctgTccttgaatgcta  
gttgagtaataatcttGgaacagattggaatcacacgacctggatggagtgggacagagaaattaacaattacacaagcttaatacactccttaattgaag  
aatCGaaaaccagcaagaaagaatgaacaagaattattggaattagataaatggcaagtttGgaattggttaacatacaaaattggctgTggtataata  
aattattcataatgatagtaggagccttggtaggttaagaatagttttgctgacttctatagtgaaatagagtaggagggatattcaccattatcgtttagaccca  
cctcccaacccCGaggggaccCGacaggccCGaaggaatagaagaagaaggtggagagagagacagagacagatccattcgttagtgaacggatctc  
gacggtatCGCCgaattcaaaatggcagttatcccaaatTTaaagaaaaagggggattgggggtacagtgcaggggaaagaatagtagacataat  
agcaacagacatacaaaataaagaattcaaaaaaattcaaaaaattcgggttattacagggacagcagagatccagtttgactaggtatc  
ctttaccactccctatcagtgatagaaaaagtgaaagtcgagttaccactccctatcagtgatagagaaaaagtgaaagtcgagttaccactccctatcagtgat  
agagaaaaagtgaaagtcgagttaccactccctatcagtgatagagaaaaagtgaaagtcgagttaccactccctatcagtgatagagaaaaagtgaaagtcga  
gtttaccactccctatcagtgatagagaaaaagtgaaagtcgagttaccactccctatcagtgatagagaaaaagtgaaagtcgagctcggtagccgggtcaggg  
taggCGtgatccggtgggagcctataagcagagctggttagtgaaagcagctgagcctgagagccatccacgctgtttgacctccatagaagacacc  
gggactgacagcctCGCCCGcctgtagtggatgctggtggaattctgcatatacaACAAGTTTGTACAAAAAAGCAGGCTgcacc  
atggtgagcaaggCGagggagataaactggccatcaagggattcgcctcaaggtgcaacatggagggtcctgtaacggccacgagttcagat  
cgagggCGagggCGagggccctacgagggcaccagaccCGcaagctgaaggtgaccaaggggtggccctgCcttCGcctgggacatcctgtc  
ccctcagttcatgacggctcaaggcctacgtgaagcaccCGcgcacatccCGactcttgaagctgctcctccCGagggctcaagtgaggCGcgtga  
tgaactCGaggaCGgCGgctggtgacctgaccaggaactcctcctgCaggacCGgagttcatctacaaggtgaagctgCGcgcaccaactccctc  
CGacgGCCCGtaatcgagaagaagaccatgggctgggaggcctcctCGagcggatgacccCGagcggCGcctgaagggCGagatcaagcaga

ggctgaagctgaaggacggcgccactacgacgctgaggtcaagaccacctacaaggccaagaagcccgtgacgctgccggcgccctacaacgtcaac  
atcaagttggacatcacctcccacaacgaggactacaccatcgtggaacagtagcaacgcgcccaggggccactccaccggcgccatggacgagctgt  
acaagtcgggactcAGATCTATGGCTCCAGAGATCAACTTCCGGGCCCAATGAGCCTCATTGATAAACACTAAAG  
GCAGCTGGTGGTGAATCCAGAAGCTGAAGATCCTATCTGCAATTACGCAGCCTGTGGTGGTGGTGGCGA  
TTGTGGCCCTCTATCGCACAGGCAAATCCTACCTGATGAACAAGCTGGCTGGGAAGAAAAACGGCTTCTCTC  
TAGGCTCCACAGTGAAGTCTCACACCAAGGGAATCTGGATGTGGTGTGTGCCTCATCCCAAGAAGCCAGAAC  
ACACCCTAGTTCTGCTCGACACTGAGGGCCTGGGAGATATAGAGAAGGGTGACAATGAGAATGACTCCTGG  
ATCTTTGCCTTGGCCATCCTCCTGAGCAGCACCTTCGTGTACAATAGCATGGGAACCATCAACCAGCAGGCC  
ATGGACCAACTTCACTATGTGACAGAGCTGACAGATCGAATCAAGGCAAACCTCCTCACCTGGTAACAATTCTG  
TAGACGACTCAGCTGACTTTTGTGAGCTTTTTTCCAGCATTGTGTGGACTCTCAGAGATTTACCCTGGAAC  
GGAAGTAGATGGAGAACCATCACTGCTGATGACTACTTGGAGCTTTTCGCTAAAGCTAAGAAAAGGTACTGA  
TAAGAAAAGTAAAAGCTTTAATGATCCTCGGTTGTGCATCCGAAAGTTCTTCCCAAGAGGAAGTGCTTCGTC  
TTCGATTGGCCCGCTCCTAAGAAGTACCTTGTACCTAGAGCAGCTAAAGGAGGAAGAGCTGAACCCTGAT  
TTCATAGAACAAGTTGCAGAATTTTGTCTACATCCTCAGCCATTCCAATGTCAAGACTCTTTCAGGTGGCAT  
TCCAGTCAATGGGCCTCGTCTAGAGAGCCTGGTGTGACCTACGTCAATGCCATCAGCAGTGGGGATCTAC  
CCTGCATGGAGAACGCAGTCTGGCCTTGGCCAGATAGAGAACTCAGCCGCAGTGGAAAAGGCTATTGCC  
CACTATGAACAGCAGATGGGCCAGAAGGTGCAGCTGCCACGGAAACCCTCCAGGAGCTGCTGGACCTGCA  
CAGGGACAGTGAGAGAGAGGCCATTGAAGTCTTCATGAAGAACTCTTTCAGGATGTGGACCAATGTTCCA  
GAGGAAATTAGGGGCCAGTTGGAAGCAAGGCGAGATGACTTTTGTAAAGCAGAATTCCAAGCATCATCAGA  
TTGTTGCATGGCTTTACTTCAGGATATATTTGGCCCTTTAGAAGAAGATGTCAAGCAGGGAACATTTTCTAAAC  
CAGGAGGTTACCGTCTCTTACTCAGAAGCTGCAGGAGCTGAAGAATAAGTACTACCAGGTGCCAAGGAAGG  
GGATACAGGCCAAAGAGGTGCTGAAAAAATATTTGGAGTCCAAGGAGGATGTGGCTGATGCACTTCTACAGA  
CTGATCAGTCACTCTCAGAAAAGGAAAAAGCGATTGAAGTGAACGTATAAAGGCTGAATCTGCAGAAGCTG  
CAAAGAAAATGTTGGAGGAAATACAAAAGAAGAATGAGGAGATGATGGAACAGAAAGAGAAGAGTTATCAGG  
AACATGTGAAACAATTGACTGAGAAGATGGAGAGGGACAGGGCCAGTTAATGGCAGAGCAAGAGAAGACC  
CTCGCTCTTAAACTTCAGGAACAGGAACGCCTTCTCAAGGAGGGATTTCGAGAATGAGAGCAAGAGACTTCAA  
AAACATATATGGGATATCCAGATGAGAAGCAAATCATTGGAGCCAATATGTAACATACTCTAAGACCCAGCTT  
TCTTGTACAAAGTgggtgatccagcacagtgccgcccgcctgagctagagggcccgcggttgaataaccatacagcgtccagactacgcttagt  
aatgattaataaactagaaattctaccgggtaggggagggcgttttccaaggcagctgagtagtaaccaccaagatcggctccgcgcccgggtttggcgc  
ctcccgcggcgccccctctcagggcagcgtcgcacgtcagcagaagggcgcagcagcgtcctgatcctccggcagcgtcaggacagcggc  
ccgctgctcataagactcggccttagaacccccagatcagcagaagggacatttaggacgggactgggtgactctaggccactgggtttcttccagagagcgg  
aacagggcaggaaaagtagtcccttctcggcgattctcgggagggatcctcgtggggcggtaacgcccgatgattatataaggacgcgcccgggtgtggcaca  
gctagtccgctcgcagccgggatttgggtcgggttctgtttgtggatcgctgtagctgactggtagtagcgggctgctgggtcggcggggcttctggtggccg  
ccgggcccgtcgggtgggacggaagcgtgtggagagaccgccaagggtctgtagtctgggtccgcgagcaagggtgcctgaactgggggttggggggagcg  
cagcaaaatggcggctgttcccagcttgaatggaagacgcttctgagggcgggtctgaggtcgttgaacaagggtggggggcagtggtggcggaagaa  
cccaaggctttaggccttgcctaagcgggaaagcttattcgggtgagatgggctggggcaccatctggggaccctgacgtgaagttgtactgactgag  
aactcgggttctgctgttggcggggcggcagttatggcgggtgcccgttggcagtgaccctgacctttgggagcgcgcccctgctgctgctgacgtcacc  
gttctgttggcttataatcaggggtggggccacctcgggtaggtgtcgggtaggcttctcctcgcagggacgcagggttgggctagggttaggtctcctgaa  
tcgacagggcgggacctctggtgaggggagggataagtgagggcgtcagtttcttggcgggtttagtacctatctttaaagtagctgaagctccgggttgaact  
atgctcgggggttggcagtggttttgaagtttttaggcacctttgaaatgtaatcattgggtcaaatgtaatttcagtgtagtagtaaatgctccgctaaa  
ttctggccgttttggctttttgtagacgaagcttggtaccgagctcggatctccacccctgaccggtcctgagcgaattcccatgtctagactggacaagagc  
aaagtcataaacggagctctggaattactcaatggtgtcggatcgaaggcctgacgacaaggaaactcgtcaaaagctgggagttgagcagcctaccctgt  
actggcacgtgaagaacaagcgggcccctgctcgtgcccctgcaatcgcagatgctggacaggcatatacccaactctgccccctggaaggcagtgatggc  
aagacttctgcggaacaacgccaagtcataccgctgtgctcctctcacatcgcgacggggctaaagtgcactctcggcaccgcccacaagagaaacagta  
cgaaaccctggaaaatcagctcgcgttctgtcagcaaggcttctcccgggagaacgcactgtacgctctgctcggcctggggcactttacactgggtcgcgta  
ttggaggaaacaggagcatcaagtagcaaaaaggaaagagagacacctaccaccgattctatgccccacttctgagacaagcaattgagctgttcgaccg  
gcagggagcccgaacctgccttcttctcggcctggaactaatcatatgtggcctgggaaacagctaaagtgcaaaagcggcgggccgaccgacgcccttga  
cgatttgacttagacatgctcccagccgatgcccctgacgacttgacctgatgctgctgctgacgctctgacgattttgacctgacatgctcccgggtaac  
taagtaaggatccgcccgcactagaggaattccgcccctctccccccccccccctaacgttactggccgaagcggccttgaataaggcgggtgtgctgtt  
tctatgttatttccaccatattgcccgttttggcaatgtgagggcccggaaacctggcctgcttcttgcagagcattcctaggggtcttcccctctcgccaaag  
gaatgcaaggctgtggaatgctggaaggaagcagttccttgaagacttctgaagacaacaacgtctgtagcagcccttgcaggcagcgggaacccccca  
cctggcagcaggtgctctgcccgaagcagctgataagatacactgcaaaaggcggcacaaccccagtgccacgttgtgagttgagttgagttgtgaa  
agagtcaaatggctctcctcaagcgtattcaacaaggggctgaaggatcccagaaggtaccctattgtatgggatctgatctggggcctcgggtgacatgctt  
acatgttttagctgaggttaaaaaaacgctagggcccccgaaaccagggagctgtgttttcttggaaaaaacacagatgataagcttaccgggtccacctgtag  
aacaagatggattgcagcaggttctccggcgttgggtagaggtctattcggctatgactgggcaacaacagacaatcggctgctgatgcccggctgttc  
cggctgctcagcgcagggcggcccgttcttttgcgaagaccgacctgcccgtcggctgaatgaactgcaagacgaggcagcggctatcgtggctggcca  
cgacgggcttcttgcagctgtgctcgcagttgtcactgaagcgggaagggactggctgctattgggcaagtgccggggcaggatctcctgtcatctacc  
ttgctcctgagaaagatcatcatggtgatgcaatgcccggctgatacctgctgacccctgaccattcgaccaccaagcgaacatcgcacg  
agcgagcacgtactcggatggaagcgggtctgtgatcaggatgatctggacgaagagcatcaggggtcgcgcccagccaactgttccagggctcaag

gcgagcatgcccagcggcgaggatctcgtcgtgacccatggcgcgctgctgccaatatcatggtggaatggccgctttctggattcatcgactgtggc  
ggctgggtggtggcggaccgctatcaggacatagcgtggctaccggtgatattgctgaagagctggcggcgaatgggctgaccgcttctcgtgctttacggtat  
cgccgctcccgattcgcagcgcacgcttctatcgcttcttgacgagttctctgatgtacaagtaaaagcggcgcgactctagatcataatcagccataccaca  
ttttagaggttttactgtcttaaaaaaacctcccacacctcccctgaaacctgaaacataaaatgaatgcaattgtgtgtttagctccctccaattcgatataagct  
tatcgcgatagatcctaatacactctggattacaaaattgtgaaagattgactggtattcttaactatgttctctttacgctatgtggatagcgtgcttaatgccttt  
glatcatgctattgctcccgtatggcttctctctctgtataaaactggttgcctctttatgaggagttgtggccggtgtcaggcaacgctggcgtggtgtgc  
actgtgttctgctgacgcaaccctcctggttggcctatgcccaccctgtcagctccttccgggacttctgcttcccccctcctattgcccacggcgaactcatcg  
ccgctgcttgcgctgctggacaggggctcgtgttggcactgacaattccgtggtgttgcgggaaatcatcgtccttcttggctgctcgcctgtgttgc  
cacctggattctgcgcccagccttctgctacgtccttccggccctcaatccagcggaccttctcccgcggcctgctcgcggctcgcgcttctccgctt  
cgcttgcctcagacgagctcgatccttggcggcctcccgcctgagatccttaagaccaatgacttaacaggcagctgtagatcttagccacttttaa  
aagaaaagggggactggaagggctaattcactcccacgaagacaagatcgtcttttgcctgtactgggtctctctggttagaccagatctgagcctgggagc  
tctctggtaactaggaaccactgcttaagcctcaataaagcttgccttgagtctcaagtagtgtgtcccgtctgtgtgactctgtaactagagatccct  
cagacccttttagctcagtggtgaaatctctagcagtagtctatgtcatcttattatctagttataactgcaaagaaatgaatcagagagtgagaggccc  
gggtaattaagaaagggctagatcattctgaagcgaagggcctcgtgatacgcctattttataggttaatgcatgataataatggttcttagacgtcaggt  
ggcactttcggggaatgtgcggaaccctattgttttctaaatacattcaaatatgatccgctcatgagacaataaccctgataaatgctcaataat  
tgaaaaggaagagtagtattcaacattccgtgctccctattcccttttgcggcatttgccttctgttttgcctaccagaaacgctggtgaaagtaaa  
gatgctgaagatcagttg

>plInducer-mCherry-GBP3

tgaagatcagttgggtgcacgagtggttacatcgaactggtatcaacagcggtaagatccttgagagtttgcgccgaagaacgtttccaatgatgagcact  
tttaaagtctgctatgtggcgggtattatcccgtgtgacgccgggaagagcaactcggctgcgcgcatacactattctcagaatgacttgggtgagtagctacca  
gtcacagaaaagcatctacggatggcatgacagtaagagaattatgacgtgctgcataaccatgagtgataaacactgcccgaacttactctgacaacgat  
cggaggaccgaaggagcctaaccgctttttgcacaacatgggggatcatgtaactcgccttgatcgttgggaaccggagctgaatgaagccataccaaacgac  
gagcgtgacaccacgatgctgtagcaatggcaacaacgttgcgcaactatctaggcgaactacttactctagcttcccggcaacaataatagactggat  
ggagggcgataaagttgcaggaccacttctcgcctcggcctcgggctggctggttattgctgataaatctggagccggtgagcgtgggtctcgcggtatcattg  
cagcactggggccagatggtgaagcctcccgtatcgtatctacacgacgggagtcaggcaactatggatgaacgaaatagacagatcgtgagatag  
gtgctcactgattaagcattgtaactgtcagaccaagttactcatataactttagattgatttaaaactcatttttaattaaaaggatctaggtgaagatccttttg  
ataatctatgacaaaatcccttaacgtgagtttcttccactgagcgtcagacccttagaaaagatcaaaggatcttctgagatcctttttctgctgcaaac  
tgctctgcaaacaaaaccacccgctaccagcgggtgttggcttggcggatcaagagctaccaactctttccgaaggtactgcttaccagagcagcgcag  
ataccaataactgttcttagttagccttagttagccaccactcaagaactctgtagcaccgctacatacctcgtctgtaactcttaccagatggctgctg  
ccagttggcagataagctcgtcttaccgggttggactcaagacgataaccgataaaggcgcagcggctgagggtgcaacgggggtcgtgacacagccca  
gcttggagcgaacgactacaccgaactgagatacctacagcgtgagctatgagaagcgcaccgcttcccgaaggagaaaggcggacaggtatccggt  
aagcggcagggtcggaaacaggagagcgcacgagggagctccaggggaaacgctggtatcttatagtcctgctcgggttccgaccctgacttggagcgt  
cgattttgtgatgctcgtcagggggcggagcctatgaaaaacgccaagcaacgcggccttttacggttccctggccttttgccttctgctacatgttcttct  
gcttaccctgattctgtgataaccgtattaccgctttagtgagctgataaccgctcgcgcagccgaacgaccgagcgcagcaggtcagtgagcggagga  
agcggaaagagcggccaatacgaacaccgcttccccgcgcttggcggattcattaatgcagcaagctcatgctgactaattttttatattatgcagaggccg  
aggccgctcggcctctgactattcagaagtagtgaggaggctttttggaggcctaggctttgcaaaaagctcccgtggcagcagcaggttcccgactgg  
aaagcggcagtgagcgaacgcaatattgtgagttagctcacttaggcaccccaggcttactcttctcggctcgtatgtgtggaattgtgagc  
ggataacaatttcacacaggaaacagctatgacatgattacgaattcacaataaagcatttttactgacttctagttgtgttgcctaaactcatcaatgatct  
tatcatgtctggataactgataactcaagctaaccaaaatcatccaaactcccacccataccttaccactgccaattacctgtggttcttactctaaa  
cctgtgattcctcgaattatttctttaaagaaattgtattgttaaatgtactacaaacttagtagttggaagggtaattcactcccacaagaagacaagatac  
cttcatctgtggtatccacacacaaggctacttccctgattagcagaactacaccaggggcaggggtcagatccactgaccttggatggtgctacaag  
ctagtagcagttgagccagataaggtagaagaggccaataaaggagagaacaccagctgttacaccctgtgagcctgcatgggatgtagaccggagag  
agaagtgttagagtgagggttgacagccgctagcattcatcagtgccgagagctgcatccggagtagtcaagaactgctgatacagacttgcataca  
gggacttccgctgggacttccaggggagcgtggcctgggaggactgggagtgccgagccctcagatcctgcatataagcagctgcttttgcctgactg  
ggtctctggttagaccagatctgagcctgggagctctctggtaactagggaaaccactgcttaagcctcaataaagcttgccttgagtgctcaagtagtgtg  
cccgtctgtgtgactctgtaactagagatccctcagacccttttagctagtggtgaaaaatctctagcagtgccgcccgaacagggacttgaagcgaagg  
gaaaccagaggagctctcgcagcaggactcggcttgcgaagcgcacggcaagaggcgaagggcggcgcgactggtgagtagcggcaaaaatttgcact  
agcggaggctagaaggagagatgggtgcgagagcgtcagtttaagcgggggagaattagatcgcgatgggaaaaaattcgggttaaggccaggggga  
aagaaaaataaataaataatagatagtggaagcagggagctagaacgattcgcagttatcctggcctgttagaaacatcagaaggctgtagacaa  
atactggacagctacaaccatccctcagacaggatcagaagaacttagatcattataataacagtagcaaccctctattgtgtcatcaaggatagagata  
aaagacaccaaggaagcttagacaagatagaggaagagcaaaaacaaagtaagaccaccgcacagcaagcggccgctgactcagacctgga  
ggagagatagaggacaattggagaagtgaaatataataaagtagtaaaaattgaaccatagtagtagcaccaccaagcgaagagaagagag  
cgtgcagagagaaaaaagagcagtgggaaataggacttggcttgggagcagcaggaagcactatgggagcagctgacagctgacgctgacggt  
acagccagacaattattgtctgtatagtcagcagcagaacaatttgcgtgagggctattgagggcgaacagcactgttgcaactcacagctcgtggc  
agcagctcaaggcaagaatcctggctgtgaaagatacctaaggatcaaacgctcctggggttgggtgctctggaaaactcattgcaccactgctgtg  
cttggaaatgtagttgagtaataaatcctggaacagatttgaatcacacgacctggatggagtgggacagagaaattaacaattacacaagcttaatacact  
ccttaattgaagaatcgaaaaccagcaagaaaagaatgaacaagaattattggaattagataaatgggcaagtttgggaattggttaacatacaaaattg  
ctgtgtatataaaattattcataatgatagtagggccttggtaggttaagaatggttctgacttctatagtagaagtagtaggagggatattaccattat

cgtttcagaccacctccaaccccgaggggacccgacagggcccgaaggaatagaagaagaaggtggagagagagacagagacagatccattcgatta  
gtgaacggatctcgacggtatcgccaattcacaatggcagttatccacaattttaaaagaaaggggggattgggggtacagtgacaggggaaagaa  
tagtagacataatagcaacagacatacaaaactaaagaattacaaaaacaaattacaaaaattcgggtttattacagggacagcagagatccagtt  
tggactaggatcctttaccactccctatcagtgatagagaaaagtgaaagtcgagtttaccactccctatcagtgatagagaaaagtgaagtcgagtttaccact  
ccctatcagtgatagagaaaagtgaagtcgagtttaccactccctatcagtgatagagaaaagtgaagtcgagtttaccactccctatcagtgatagagaaa  
agtgaagtcgagtttaccactccctatcagtgatagagaaaagtgaagtcgagtttaccactccctatcagtgatagagaaaagtgaagtcgagtttaccactccctatcagtgatagagaaa  
cccgggtcgaggttaggcgtgtacgggtgggagccctatataagcagagctggtttagtgaaaccgtcagatcgctggagacgccatccacgctgtttgacctcc  
atagaagacaccgggaccgatccagcctccgcgccccaactagtcagtggtggaattctgcagatatcaACAAGTTTGTACAAAAAGC  
AGGCTgccaccatggtgagcaagggcgaggagataacatggccatcatcaaggagttcatgcttcaagggtcacatggagggtccctgtaacggcc  
acgagttcgagatcgagggcgagggcgagggcgcccctacgagggcaccagaccgccaagctgaagggtaccaaggggtggccccctgcccctcgct  
gggacatcctgtcccctcagttcatgtacggctccaaggcctacgtgaagcaccggccgacatccccgactacttgaagctgcttccccgagggctcaagt  
gggagcgcgtgatgaactcgaggacggcggcgtggtgaccgtgaccaggactcctcctcgaggacggcgagttcatctacaaggtgaagctgcggcc  
accaactccccccgacggccccgtaatgcagaagaagaccatgggctgggagggcctcctcgagcggatgtacccccgagacggcgccctgaagggcg  
agatcaagcagagggctgaagctgaaggacggcggcactacgacgctgaggtcaagaccactacaaggccaagaagccgctgcagctgcccggcgc  
tacaacgtcaacatcaagttggacatcacctcccacaacgaggactacaccatcgtggaacagtagcaacgcggcggagggccgactccaccggcggca  
tggacgagctgtacaagtcggactcAGATCTATGGCTCCAGAGATCCACATGACAGGCCAATGTGCCTCATTGAGAAC  
ACTAATGGGGAAGTGGTGGCGAATCCAGAAGCTCTGAAAATCCTGTCTGCCATTACACAGCCTGTGGTGGT  
GTGGCAATTGTGGCCTCTACCGCACAGGAAAATCCTACCTGATGAACAAGCTAGCTGGGAAGAATAAGGG  
CTTCTCTCTGGGCTCCACAGTGAATCTCACACCAAAGGAATCTGGATGTGGTGTGTGCCTCACCCCAAAA  
GCCAGAACACACCTTAGTCTGCTTGACACTGAGGGCCTGGGAGATGTAAAGAAGGGTGACAACCAGAATG  
ACTCCTGGATCTTACCCTGGCCGTCTCCTGAGCAGCACTCTCGTGTACAATAGCATGGGAACCATCAACC  
AGCAGGCTATGGACCAACTGTACTATGTGACAGAGCTGACACATCGAATCCGATCAAAATCCTCACCTGATG  
AGAATGAGAATGAGGATTCAGCTGACTTTGTGAGCTTCTTCCCAGATTTTGTGTGGACACTGAGAGATTTCTC  
CCTGGACTTGAAGCAGATGGACAACCCCTCACACCAGATGAGTACCTGGAGTATTCCCTGAAGCTAACGCA  
AGGTACCAGTCAAAAAGATAAAAAATTTAATCTGCCCGACTCTGTATCCGGAAGTTCTTCCAAAGAAAAA  
TGTTTTGTCTTCGATCTGCCATTACCCGCAGGAAGCTTGCCAGCTTGAGAACTACAAGATGAAGAGCTG  
GACCTGAATTTGTGCAACAAGTAGCAGACTTCTGTTCTACATCTTAGCAATCCAAAACAAAACTCTTTC  
AGGAGGCTCAAGGTCAATGGCCCTCGTCTAGAGAGCCTAGTGTGACTATATCAATGCTATCAGCAGAGG  
GGATCTGCCCTGCATGGAGAACGCAGTCTGGCCTTGCCCGATAGAGAACTCAGCCGCAGTGCAAAAGG  
CTATTGCCCACTATGACCAGCAGATGGGCCAGAAGGTGCAGCTGCCCGCAGAAACCCTCAGGAGCTGCTG  
GACCTGCACAGGGTTAGTGAGAGGGAGGCCACTGAAGTCTATATGAAGAACTCTTCAAGGATGTGGACCAT  
CTGTTTCAAAAGAAATTAGCGGCCAGCTAGACAAAAAGCGGGATGACTTTTGTAAACAGAATCAAGAAGCAT  
CATCAGATCGTTGCTCAGCTTTACTTCAGGTCATTTTCAGTCTCTAGAAGAAGAAGTGAAGGCGGGAATTTA  
TTCGAAACCAGGGGGCTATTGTCTCTTTATTGAGAAGCTACAAGACCTGGAGAAAAAGTACTATGAGGAACCA  
AGGAAGGGGATACAGGCTGAAGAGATTCTGCAGACATACTTGAATCCAAGGAGTCTGTGACCGATGCAATT  
CTACAGACAGACCAGATTCTCACAGAAAAGGAAAAGGAGATTGAAGTGAATGTGTAAGGCTGAATCTGCA  
CAGGCTTCAGCAAAAATGGTGGAGGAAATGCAATAAAGTATCAGCAGATGATGGAAGAGAAAGAGAAGAGT  
TATCAAGAACATGTGAAACAATTGACTGAGAAGATGGAGAGGGAGAGGGCCAGTTGCTGGAAGAGCAAGA  
GAAGACCCTCACTAGTAACTTCAGGAACAGGCCCGAGTACTAAAGGAGAGATGCCAAGGTGAAAGTACCCA  
ACTTCAAATGAGATACAAAAGCTACAGAAGACCCTGaaaaaaaaaCCAAGAGATATATGTCGCATAAGCTAAA  
GATCtaaGACCCAGCTTTCTGTACAAAGtggttgatccagcacagtgccggcgcgctcagcttagagggcccgcggttcgaataccata  
cgacgtcccagactacgcttagtaataaactagaaattctaccggtaggggagggcgctttccaaggcagcttgagtaaccaccaagatctg  
gcctccgcgcccgggtttggcgcctcccgcggcgccccctcctacggcgagcgtgccacgtcagacgaagggcgagcagcgtcctgatcctccgc  
ccggacgctcaggacagcggcccgtgctcataagactcggccttagaaccaccagatcagcagaaggacatttaggacgggacttgggtgacttagggc  
actggtttcttccagagagcgggaacaggcgaggaaaagttagtcccttctcgcgatctcgggagggatcctctggggcggtgaacgccgatgattataa  
ggacgcgcccgggtgtgacacagctagtccgtcgcagcgggatttgggtcgcggttctgtttggatcgctgtgatcgtacttggtagtagcgggctgctg  
gctggcccgggcttctggtggccgcccggcgcctcgtgggacggaagcgtgtggagagaccgccaagggctgtagtctgggtccgcgagcaaggttgcct  
gaactgggggttgggggagcgcagcaaatggcggctgtcccagcttgaatggaagacgcttgtgagggcggtgtaggtcgtgaaacaaggtggg  
gggcatggtgggggcaagaaccaaggtctgagccctcgtaatgcgggaaagccttattcgggtgagatgggtcggggaccatctggggaccctgac  
gtgaagttgtactgactggagaactcggttgtcgtctgttcggggggcagttatggcgggtcgggtgggacgtgcaccctgacttgggagcgcgccc  
ctcgtcgtgctgacgtcaccgttctgttgcctataatgcaggtggggccactcgggttaggtgtcggtaggcttttccgtcgcaggacgcagggctc  
ggcctaggttaggtcctcgaatcgacagggcggaccctcgtgtaggggagggataagtgaggcgtcagtttcttggctgggtttatgtacctatcttctaag  
tagctgaagtcgggtttgaactatgcgctcggggttggcagtggtgtttgtgaagtttttaggcacctttgaaatgtaactatttgggtcaaatgtaatctcagtt  
agactagtaaatgtccgtaaatctggccttttggccttttttagacgaagccttggtagcagctcggatcctccaccggctaccggctcagtcgaattcac  
catgtctgactgagcaagagcaaaagcataaaacggagctcgtgaactactcaatggtgtcggatcgaagggcctgacgacaaggaactcgcataaagct  
gggagttgagcactaccctgactgacgtgaagaacaagggccctgctcgtatccctccaatcgagatgctggaacggatcataccactctcgc  
ccccggaagcgcagtcagcaagacttctcgggaacaacgccaagtcataaccgctgtgctcctcctcacatcgcgaggggctaaagtcagctcggcac  
ccgccaacagagaaacagtacgaaaccctggaaaatcagctcgcgttctcgtgtcagcaaggtcttccctggagaacgcactgtacgctctgtccgctg  
ggccactttactggctcgtattggaggaacaggagcatcaagtagcaaaagaggaaagagagacacctaccaccgattctatgccccacttctgaga

caagcaattgagctgtcgaccggcagggagccgaacctgccttctttcggcctggaactaatcatatgtggcctggagaacagctaaagtgcgaaagcg  
gcggggcagaccgacgcccttgacgattttgacttagacatgctcccagccgatgcccttgacgactttgacctgatatgctgctgctgacgctcttgacgattttg  
accttgacatgctccccgggtaactaagtaagatccgcggcgcactagaggaattccgcccctctcccccccccccccaactgactggccgaagccgct  
tggataaagccgggtgctgctttgctatattttccaccatattgcccgtctttggcaatgtgagggcccgaaacctggccctgtctcttgacgagcattccta  
gggtctttcccctcgccaaaggaatgcaaggctgtttgaatgctgtaaggagcagttcctctggaagcttctgaagacaacaacagctgtgagcaccct  
ttcagggcagcggaaacccccacctggcgacaggtgctctgcccgaaaagccagtgataacacctgcaaaagggcgcacaacccccagtgccac  
gttgtagttggatagttgtgaaagagtcacaattggctcctcaagcgtattcaacaagggcgtgaaggatgccagaaggtacccccattgatgggatctgac  
tggggcctcgggtcacatgctttacatgttttagtcgaggttaaaaaaacgtctaggccccgaaccacggggacgtggtttcttggaaaaacacagatgata  
agcttaccgggtccaccatgattgaacaagatggattgcacgcaggttctccggccgcttgggtggagaggtattcggctatgactgggcacaacagacaatcg  
gctgctctgatgcccgggttccggctgtcagcgcaggggcgcccgggtctttttgcaagaccgacctgtccgggtccctgaatgaactgcaagacgagggcag  
cgccgctatcgtggctggccacgacggcggttcttgcgcagctgtgctgcagctgtgactgaagcgggaaggactggctgctattggcgcaagtgccggg  
gcaggatctcctgtcatctcacctgctcctgcccagaaagatccatcatggctgatgcaatgcggcggctgcatacgttgatccggctacctgcccattcgacc  
accaagcgaaacatcgatcgagcgcagcagctactcggatggaagccggcttctgctgacaggtatgctggacgaagagcagcaggggctcgcgccagc  
cgaactgttcgcccaggtcaaggcgcagcagctcccagcggcgaggatcctgctgacccatggcgatgctgctgcccgaataatcaggtggaatggccg  
tttctggattcatgactgtggccggctgggtgtggcggaccgctatcaggacatagcgttggctaccctgataattgtaagagcttggcggcgaatgggctg  
accgcttctcgtgctttacggatcgccgctcccgattcgcagcgcacgcttctatgccttctgacgagttcttctgatgataaagcggccgactct  
agatcataatcagccataccacattttagaggtttactgtcttaaaaaacctcccacacctcccctgaacctgaaacataaaatgaatgcaattgtgtttta  
gtccctccaattcgatacaagcttaccgcatagatcctaataacctctggattacaaaattgtgaagattgactggtattcctaactatgttctctttacgct  
atgtggatacgtgctttaaagcctttgatcatgctattgctcccgtatgctttcattttctcctctgtataaaatcctggtgctgctctttatgaggagttgtgcccgt  
gtcaggcaacgtggcgtgggtgctgactgtttgctgacgcaacccccactgggtggggcattgccaccacctgctcagctccttccgggaccttccgcttcccctc  
ctattgccacggcggaaactatcgccgctgcttgcggctgctggacaggggctcggctgttggcactgacaattccgtggtgtgtcggggaaatcatcgt  
ccttcttggctgctcgcctgtgttggccacctggattctgcgcgggacgtccttctgctacgtccctcggccctcaatccagcggaccttctcccgcggcctgctg  
cggcctcgcggccttccgctcttcgcttccgcccagacgagtcggatcctccttggcggcctcccgcctgagatcctttaaagaccaatgacttacaag  
gcagctgtagatcttagccacttttaaaagaaaaggggggactggaaggctaatcactcccaacgaagacaagatcgtcttttctgtactgggtctctctg  
gttagaccagatctgagcctgggactctctggtaactagggaaacctgcttaagcctcaataaagcttgcctgagtgctcaagtagtgtgtcccgtctgt  
gtgtgactctgtaactagatccctcagacccttttagctaggtggaatctctagcagtagtagttcatgtcatcttattcagattataactgcaagaa  
atgaataatgagagtgagagggccgggtaataaaggaaagggctagatcattctgaagcgaagggcctcgtgatacgcctattttataggttaatgcat  
gataataatggttcttagacgtcaggtggcactttcggggaaatgtgcggaaccctattgttttctaaatacattcaaatatgatccgctcatgagaca  
ataacctgataaatgcttcaataatattgaaaaggaagatagattcaacattccgtgctcgccttattcccttttggcggcatttgcctcctgttttctca  
cccgaaacgctggtgaaagtaaaagatgc

>plInducer-GBP4-mCherry

tgaagggtaattcactcccaagaagacaagatatccttgatctggtatctaccacacacaaggctactccttgattagcagaactacacaccagggcca  
ggggtcagatatccactgaccttggatggtgctacaagctagtaccagttgagccagataaggtagaagggccaataaaggagagaacaccagctgttac  
acctgtgagcctgcatgggatggatgacccggagagagaaggttagagtgagggttgacagccgctagcatttcatcagctggcccggagagctgcatcc  
ggagacttcaagaactgctgatctgagctgtctacaagggacttccgctggggacttccagggaggcgtggcctggcgggactggggagtgccgagcc  
ctcagatcctgcatataagcagctgcttttgcctgactgggtctctctggttagaccagatctgagcctgggagctctctggtaactagggaaacctgcttaag  
cctcaataaagcttgcctgagtgctcaagtagtgtgtcccgtctgtgtgactctggaactagagatccctcagacccttttagctagtggaatctctag  
cagtgccgcccgaacagggactgaaagcgaagggaaaccagaggctctctgcagcaggactcggctgctgaagcgcgcacggcaagaggcga  
ggggcggcagctggtagtacgcaaaaattttagctagcggaggctagaaggagagatgggtgagagagcgtcagtttaagcgggggagaattaga  
tcgcatgggaaaaaattcggttaaggccaggggaaagaaaaataaataaaacataatagatgggcaagcagggagctagaacgattcgcagttaa  
tctggtgctgtagaacatcagaaggctgtagacaaactgggacagctacaaccatccctcagacaggatcagaagaacttagatcattataataacag  
tagcaacctctattgtgcatcaaggatagagataaaagacaccaaggaagctttagacaagatagaggaagagcaaaaacaaagtaagaccaccg  
acagcaagcggccgctgctcagacctggaggaggatagatgagggaactggagaagtaattataataataaagtagtaaaaaattgaacca  
ttaggtagtaccaccaaggaagagaagatggtgctgagagagaaaaagagcagtggaataggagcttgttcttgggttctgggagcagcagg  
aagcactatgggcgacgctcaatgacgctgacggtacaggccagacaattattgtctgtatagtgacgagcagacaattgtgagggctattgaggcg  
caacagcatctgtcaactcacagctcgggcatcaacgagctccaggcaagaatcctggctgtgaaagatacctaaaggatcaacagctcctgggattt  
ggggtgctctggaaaactcatttgcaccactgctgtccttggatgctagttggagtaataaatctctggaacagatttgaatcacacgacctggatggagtg  
gacagagaaattaacaattacacaagcttaatacactcctaattgaagaatcgcaaaaccagcaagaaagaatgaacaagaattattggaattagataaat  
gggcaagttgtggaattggttaacataacaaattggctgtggtatataaaattattcataatgatagtagggcttggtaggttaagaatagttttgctgacttct  
atagtgaaatagattagcagggatattcaccattatccttgcagaccacctcccaaccccgaggggacccgacagggcccgaaggaatagaagaag  
tgagagagagacagagacagatccattcgattagtaacggatctgcagcgtatcgcgaattcacaatggcagttatccacaattttaaaagaaaag  
ggggattgggggtacagtgacagggaaagaatagtagacataatgcaacagacatacaaaactaaagaattacaaaacaaattcaaa  
atttccgggttattacagggacagagatccagttggactaggtcttaccactcctatcagtgatagagaaaagtgaaagtcgagtttaccactcctatcagtgatagagaaaagtg  
aagtcgagtttaccactcctatcagtgatagagaaaagtgaaagtcgagtttaccactcctatcagtgatagagaaaagtgaaagtcgagtttaccactcct  
atcagtgatagagaaaagtgaaagtcgagctcggatccgggtcgaggtaggcgtgtacggtgggagcctatataagcagagctcgtttagtgaaacgca  
gatcgcctggagacgcatccacgctgtttgacctcatagaagacaccgggaccgatccagcctccgcccgaactagtcaggtgtgtggaattctgc  
agatatcaACAAGTTTGTACAAAAAGCAGGCTgccaccATGGGTGAGAGA ACTCTTACAGCTGCAGTGCCACAC



CAGGTTATCCAGAATCTGAATCCATCATGATGGCCCCATTTGTCTAGTGGAAAACCAGGAAGAGCAGCTGA  
CAGTGAATTCAAAGGCATTAGAGATTCTTGACAAGATTTCTCAGCCCCTGGTGGTGGTGGCCATTGTAGGGC  
TATACCGCACAGGAAAATCCTATCTCATGAATCGTCTTGACAGGAAAGCGCAATGGCTTCCCTCTGGGCTCCA  
CGGTGCAGTCTGAAACTAAGGGCATCTGGATGTGGTGTGTGCCACCTCTCTAAGCCAAACCACACCCTG  
GTCCTTCTGGACACCGAGGGCCTGGGCGATGTAGAAAAGAGTAACCCTAAGAATGACTCGTGGATCTTTGCC  
CTGGCTGTGCTTCTAAGCAGCAGCTTTGTCTATAACAGCGTGAGCACCATCAACCACCAGGCCCTGGAGCAG  
CTGCACTATGTGACTGAGCTAGCAGAGCTAATCAGGGCAAATCCTGCCCCAGACCTGATGAAGCTGAGGA  
CTCCAGCGAGTTTGCAGTCTTTCCAGACTTTATTTGGACTGTTTCGGGATTTTACCCTGGAGCTAAAGTTA  
GATGGAAAACCCATCACAGAAGATGAGTACCTGGAGAATGCCTTGAAGCTGATTCCAGGCAAGAATCCCAA  
ATTCAAATTCAAACATGCCTAGAGAGTGTATCAGGCATTTCTTCCGAAAACGGAAGTGCTTTGTCTTTGACC  
GGCCTACAAATGACAAGCAATATTTAAATCATATGGACGAAGTGCCAGAAGAAAATCTGGAAAGGCATTTCT  
TATGCAATCAGACAACCTTCTGTTCTTATATCTTCAACCATGCAAAGACCAAGACCCTGAGAGAGGGAATCATT  
GTCACTGGAAAGCGGCTGGGGACTCTGGTGGTACTTATGTAGATGCCATCAACAGTGGAGCAGTACCTTG  
TCTGGAGAATGCAGTGACAGCACTGGCCAGCTTGAGAACCAGCGGCTGTGCAGAGGGCAGCCGACCAC  
TATAGCCAGCAGATGGCCAGCAACTGAGGCTCCCCACAGACACGCTCCAGGAGCTGCTGGACGTGCATGC  
AGCCTGTGAGAGGGAAGCCATTGCAGTCTTTCATGGAGCACTCCTTCAAGGATGAAAACCATGAATCCAGAA  
GAAGCTTGTGGACACCATAGAGAAAAAGAAGGGAGACTTTGTGCTGCAGAATGAAGAGGCATCTGCCAAATA  
TTGCCAGGCTGAGCTTAAGCGGCTTTCAGAGCACCTGACAGAAAAGCATTGAGAGGAATTTTCTCTGTTCCCT  
GGAGGACACAATCTACTTAGAAGAAAAGAAACAGGTTGAGTGGGACTATAAGCTAGTGCCAGAAAAGGA  
GTTAAGGCAAACGAGGTCCCTCCAGAACTTCTGCAGTACAGGTGGTTGTAGAGGAATCCATCCTGCAGTCA  
GACAAAGCCCTCACTGCTGGAGAGAAGGCCATAGCAGCGGAGCGGGCCATGAAGGAAGCAGCTGAGAAGG  
AACAGGAGCTGCTAAGAGAAAAACAGAAGGAGCAGCAGCAATGATGGAGGCTCAAGAGAGAAGCTTCCAG  
GAATACATGGCCCAAATGGAGAAGAAGTTGGAGGAGGAAAGGGAAAACCTTCTCAGAGAGCATGAAAGGCT  
GCTAAAACACAAGCTGAAGGTACAAGAAGAATGCTTAAGGAAGAATTTCAAAGAAAATCTGAGCAGTTAAAT  
AAAGAGATTAATCAACTGAAAGAAAAAATTGAAAGCACTAAAAATGAACAGTTAAGGCTCTTAAAGATCCTTGA  
CATGGCTAGCAACATAATGATTGCTACTCTACCTGGGCTTCCAAGCTACTTGGAGTAGGGACAAAATATCTT  
GGCTCACGTATTAGATCTatggtagcaaggcgaggaggataacatggccatcatcaaggagttcatgcttcaaggtagcacatggagggt  
ccgtgaacggccacgagttcgagatcgagggcgagggcgagggcgcccctacgagggcaccagaccgcaagctgaaggtagcaagggtggcc  
cctgccccttcgctggacatctgcccctcagttcatgtacggctccaaggctcagtaagcaccgcccagacatcccgcactgtgaagctgctcccc  
gagggctcaagtagggagcgcgtgatgaacttcgaggacggcgggctgtgaccgtgaccagggactcctcctcgaggcggcagttcatctacaagggtg  
aagctgacggcaccactcccctccgacggccccgtaatgcagaagaagaccatgggctgggagggcctcctccgagcggatgtaccccgaggacggcg  
ccctgaaggcgagatcaagcagaggctgaagctgaaggacggcgccactacgacgctgaggtcaagaccactacaaggccaagaagcccgtgca  
gctgcccggcgctacaacgtcaacatcaagttggacatcacctcccacaacgaggactacaccatcgtggaacagtacgaacgcgcccagggcgccac  
tccaccggcgcatggacgagctgtacaagAGATCTtaaGACCCAGCTTTCTTGTACAAAGtggtgatattccagcacagtgccggccgct  
cgagctagagggcccgggttgaataaccatacagacgtccagactacgcttagtaatgalttaactagaatctaccgggtaggggagggcgttttc  
ccaaggcagctcggagtaaccacccaagatctggcctccgcccgggttttggcgctcccggggcgccccctcctacggcgagcgtgcccacgtcag  
acgaaggcgagcagcagcgtcctgatcctccgcccggacgctcaggacagcggcccgtgctcataagactcggccttagaaccccagatcagcagaag  
gacatcttaggacgggacttgggtgactctagggcactggttttctccagagagcggaaacaggcgaggaaaagtagtcccttctcggcgatctcggaggga  
tctccgtggggcggtgaacgcccagatgattatataaggacgcccgggtgtggcacagctagttccgtcgcagcgggatttgggtcgggttctgttttgatcg  
ctgtgatcgtcacttggtagtagcgggctgctgggctggccgggcttctgtggccgcccggcctcgtgggacggaagcgtgtggagagaccgccaag  
ggctgtagctgggtccgagcaaggttgcctgaactgggggttgggggagcgcagaaaatggcggtgttcccagcttgaatggaagacgcttgtg  
aggcgggctgtgaggtcgttgaacaaggtgggggcatggtggcggaagaaccaaggtctgaggcctcgttaatgcgggaaagctctattcgggtg  
agatgggctggggaccatctggggaccctgacgtgaagttgtcactgactggagaactcggttgtcgtctgttgcggggcgagcagttatggcggtgcccgtg  
ggcagtgacccgtaccttgggagcgcgcgccctcgtcgtgctgacgtcacccttctgttggctataatgcagggtggggccacctgcccgttaggtgtgcg  
gtaggcttttccctcgcaggacgcaggggtcgggctagggttagctcctgaatcgacaggcgccggacctcgtgtgaggggaggataagtgaggcgt  
cagtttcttggctggtttatgtacctatcttcaagtagctgaagctccggtttgaactatgcgtcggggttggcgagtggttttgaagtttttaggcacctttga  
aatgtaatcattgggcaatatglaatttcagtgtagactagtaaatgtccgtaaaatctggccgttttggctttttgttagacgaagcttgtagaccgagctcggat  
ctccaccctgacccgtcctgcagtcgaattcacatgtctagactggacaagagcaaaagtcataaacggagctctggaattactcaatggtgtcggatcga  
ggcctgacgacaaggaaactcgtcaaaagctgggagttgagcagcctaccctgtactggcagctgaagaacaagcgggcccctgctcagatgccctgccaat  
cgagatgctggacaggcatataccactctgccccctggaaggcgagtcagtgcaagacttctgcggaacaacgccaagtcataccgctgtgctcctcctc  
acatcgcgacggggctaaagtcatctcggcaccgcccacagagaacagtagcaaaacctggaataacagctcgcgttctgtgtagcaaggcttctc  
cctggagaacgcactgtacgtctgtccgctggggcactttacactgggtcgtattggaggaacaggagcatcaagtagcaaaaagaggaaagagaga  
cacctaccaccgattctatgccccactctgagacaagcaattgagctgttcgaccggcagggagccgaacctgcctcctttcggcctggaactaatcatatgt  
ggcctggagaacagctaaagtcgaagcggcgggccgaccgacgccccttagcagatttgacttagacatgctcccagcctgcccctgacgactttgacc  
ttgatgctgctgacgctcgtgacgtattgaccttgacatgctcccgggtaactaagtaagatccgagggcgcactagaggaattccgcccctcccc  
ccccccccctaacgttactggccgaagcgcgttgaataaggccggtgtgctgttctatattttccacctattgcccgttttggcaatgtgaggggccg  
gaaacctggccctgtcttctgacgagcattcttaggggtctttcccctcgcgcaaggaatcaaggctgttgaatgctgtaaggaagcagttcctctggaag  
cttctgaaagacaacaacgtctgtagcacccttgcaggcagcggaaacccccacctggcgacaggtgctcctcgcggcctcggcctgacgactttgacc  
cacctgcaaaaggcgccacaaccccagtgccacgttgtgagttggatagttgtgaaagagtcgctcctcaagcgtattcaacaagggtgtaggga

tgcccagaaggtacccattgatgggatctgatctggggcctcgggtgcacatgctttacatgtgttagtgcaggttaaaaaacgtctagggccccccgaaccac  
ggggacgtggtttctttgaaaaacacgatgataagcttaccgggtccacatgatgaacaagatggattgcacgcaggtctccggccgctgggtggagagg  
ctattcggctatgactgggcacaacagacaatcggtgctctgatgccgctgttccggctgacagcagggggcccggtctttttgcaagaccgacctgt  
ccggtgccctgaatgaactgcaagacgaggcagcgcggctatcgtggctggccacgacgggcgttcttgcgagctgtctgcagctgtcactgaagcggg  
aagggactggctgctattgggcgaagtgccggggcaggatctcctgtcatctcacctgtcctcggagaaagtatccatcaggtgatgcaatgcggcggct  
gcatagcttgatccggctacctgcccattcgaccaccaagcgaacatcgcactgcagcagcagcagctcggatggaagccggcttctgctgatcaggatgat  
ctggacgaagagcatcaggggctcgcgccagccgaactgttcgccaaggtcaaggcagcagcatgcccgacggcgaggtatcctgctcgtgacctatgctg  
cctgcttgccgaatatcatgggtaaaatggccgctttctggattcatcactggtggccggctgggtggtggcgaccgatcaggacatagcgtggctaccgt  
gatattgctgaagagctggcggcgaatgggctgaccgcttctcgtgctttacggatcgcgcctcccgattcgcagcgcacgcttctatcgcctcttgacgag  
ttcttctgatgtacaagtaaagcggcggcactctagatcataatcagccataccacattgtagaggtttactgcttataaaaaacctcccacacctccccctgaa  
cctgaaacataaaatgaatgcaattgttgttttagtccctcccaattcgatatacaagcttatcgcgatagatcctaatacaacctctggattacaaaattgtgaaag  
attgactggattcttaactatgttctcctttacgctatgtggatacgtgctttaatcctttgtatcatgctattgcttccgctatggctttcttctcctctgataaat  
cctggttgcctctttatgaggagtgtggcccgttgcaggcaacgtggcgtggtgtgactggttgcagcgaacccccactggtggggcattgccaccac  
ctgtcagctcctttccgggacttctccttccccctcctattgccacggcggaaactcatcgcgcctgcttcccgtctgacaggggctcggctgtggggc  
tgacaattcgtgggtgtcgggaaatcatcgtccttcttggctgctcgcctgtggttgcacactggattcgcggggacgctcctctgctacgctcctcggccct  
caatccagcggaccttcttcccgccgctgctcggcctctcgcgcttctcgccttgcctcagacgagtcggatcctcctttgggcccgcctcccc  
gcctgagatccttaagaccaatgacttacaaggcagctgtagatcttagccacttttaaaagaaaaggggggactggaagggttaattcactcccaacgaag  
acaagatcgtcttttgcctgactgggtctctggttagaccagatctgagcctgggagctctcggtaactagggaaaccactgcttaagcctcaataaagcttg  
cctgagtgctcaagtagtgtgcccgtctgtgtgactcgtgtaactagagatccctcagacccttttagtcagtgtggaanaatctctagcagtagtagtcatgt  
catctattattcagttataacttgcaagaatgaatatacagagagtgagaggccccgggtaataaggaagggctagatcattctgaagacgaaggggc  
ctcgtgatacgcctattttataggtaatgtcatgataataatggtttcttagacgtcagggtggcactttccgggaaatgtgcgccaacccccctattgtttatctaa  
atacattcaaatatgtatccgctcatgagacaataaccctgataaatgctcaataatattgaaaaaggaagatagtagtattcaacattccgctgcacctattc  
cctttttcgggcattttgccttctgcttctcaccagaaacgctggtgaaagtaaaagatgctgaagatcagttgggtgcacagagtggttaccatcgaactgga  
tctcaacagcggtaagatccttgagagtttccggcgaagaacgtttccaatgatgagcactttaaagtctgctatgtggcgggtattatcccggttgacgcc  
gggcaagagcaactcggctcgcgcatacactattctcagaatgactggttgtagtctcaccagtcacagaaaagcatcttacggatggcatgacagtaagag  
aattatgcagtgctccataaccatgagtgataaactgcggcaacttctgacaacgatcggaggaccgaaggagtaaccgctttttgcacaacatgg  
gggatcatgtaactgcctgatcgttgggaaccggagctgaatgaagccatacacaacgcagcagcgtgacaccacgatcctgtagcaatggcaacaacgt  
tgcgcaactattaactggcgaactacttacttagcttccggcaacaataatagactggatggaggcggataaagtgcaggaccacttctgcgctcggccc  
ttccggctggctggtttatgctgataaactgtagccgggtgagcgtgggtctcgcggtatcattgcagcactggggccagatggaagccctccgctatcagta  
tctacacgacgggagtcaggcaactatgtagaacgaatagacagatagctgtagataggctcctcactgattaagcattggaatgctcagaccaagttac  
tcatatatacttagattgattaaactcatttttaatttaaaaggatcagggtgaagatccttttgataatctatgacaaaatcccttaacgtgagtttctgctcact  
gagcgtcagaccctgagaaaagatcaaaggatcttctgagatccttttctgctgtaatctgctgcttgcacaacaaaaaacaccgcctaccagcgggtgt  
ttgtttccggatcaagagctaccaactcttttccgaaggtaactgctcagcagagcgcagatacacaactgcttcttagttagccgtagttagccacca  
cttcaagaactctgtagcaccgcctacatacctcgcctgtaactcctgttaccagtggtgctgctccagtgccgataagctgcttaccgggttgactcaagac  
gatagttaccggataaggcgcagcggctcgggctgaacggggggtcgtgcacacagcccagcttgagcgaacgacctacaccgaactgagatacctaca  
gctgagctatgagaaagcgcacgcttcccgaagggagaaaggcggacaggtatccggttaagcggcagggtcggaaacaggagagcgcacgagggag  
cttccaggggaaacgctggtatctttatagctcctgctcgggttccgacctgactgagcgtcgattttgtgatgctcgcagggggcggagcctatggaaa  
aacgcccagcaacgcggccttttaccggttctggccttttctgctcctttgtcacatgttcttctcgttaccctgattctgtgataaccgattaccgctttgag  
tgagctgataccgctcgcgcagccgaacgaccgagcgcagcagctcagtgagcaggaagcggaaagcgcaccaatacgcacaaccgcttccccgc  
gcttggccgattcattaatgcagcaagctcatggctgactaattttttatgacagaggccgagggccctcggcctgagctattccagaagtagtgagga  
ggctttttggaggcctaggcttttcaaaaagctccccgtggcagcagaggttcccactggaaagcgggcagtgagcgaacgcaataatgtgagtagct  
cactcattaggcaccacggcttactttatgcttccggctcgtatgtgtggaattgtgagcggataacaatttcacacaggaacacgctatgacatgattac  
gaattcacaataaagcatttttactgcaatctagtgtgtgttccaaactcatcaatgtatcttatcagctgagatcaactggataactcaagcaaccaaaat  
catcccaaacctcccaccatcaccctattaccctgccaattacctgtggttcttacttaaacctgtgattcctcgaattattttcatttaagaaattgtattgtt  
aaatgatgactacaacttagtagt

>plInducer-mCherry-GBP5

tggaagggtaattcactcccaagaagacaagatccttgatctgtggatctaccacacacaaggctacttccctgatttagcagaactacacaccagggcca  
ggggtcagatataccactgaccttggatggtgctacaagctagtagaccgttagccagataaggtagaagaggccaataaaggagagaacaccagctgttac  
accctgtgagcctgcatggatggatgacccggagagagaaggttagagtgagggttgacagccgctagcatttcatcagctggcccggagagctgcatcc  
ggagacttcaagaactgctgatcagcgttctacaagggacttccgctggggacttccagggagcgtggcctgggcccggactggggagtgccgagcc  
ctcagatcctgcataaagcagctgcttttgcctgactgggtctctggttagaccagatctgagcctgggagctcctggttaactagggaaaccactgcttaag  
cctcaataaagcttgcctgagtgctcaagtagtgtgcccgtctgtgtgactcgtgtaactagagatccctcagacccttttagtcagctgtggaanaatctcag  
cagtgcccccgaacagggactgaaagcgaagggaacacagaggagctagcagcagcagcagctcggctgtgtaagcgcacagcggcaagagggcga  
ggggggcagctggtgtagtgcgcaaaaattttagctagcggaggtagaaggtagagatgggtgagagcgtcagattaaagcgggggagaattaga  
tcgcatgggaaaaaattcggttaagccaggggggaagaaaaataataaaacatatagtatgggcaagcaggagctagaacgattcgcagttaa  
tctggtgctgtagaacatcagaaggctgtagacaaactgggacagctacaaccatccctcagacaggatcagaagaacttagatcattataatacag  
tagcaaccctctattgtgtcatcaaggatagagataaaagacaccaagggaagcttttagacaagatagaggaagagcaaaaacaaagtaagaccaccg  
acagcaagcggccgcccgtgatctcagacctggaggaggagataggggacaattggagaagtgaattataataataaagtagtaaaaattgaacca

ttaggagtagcaccaccaaggcaagagaagagtggcagagagaaaaagagcagtggggaataggagcttggctctgggtcttgggagcagcagg  
aagcactatggcgcgacgtcaatgacgctgacggtacaggccagacaattatgtctggtatagtgacgacgagacaatttctgtagggctattgaggcg  
caacagcatctgttgaactcacagtctggggcatcaagcagctccaggcaagaatctggctgtgaaagatacctaaaggatcaacagctcctggggattt  
ggggtgctctggaaaactcatttgcaccactgctgtgcttggaaatgctagttggagtaataaatctctggaacagatttgaatcacacgacctggatggagtg  
gacagagaaattaacaattacacaagcttaatacactccttaattgaagaatcgcaaaacagcaagaaaagaatgaacaagaattattggaattagataaatt  
gggcaagtttggaaattggttaacatacaaaattggctgtggtatataaaaattattcataatgatagtaggagcttggtaggttaagaatatttctgctacttct  
atagtgaatagagttaggcaggatattcaccattatcgcttcagaccacccctcccaaccccgaggggaccggacagggcccgaaggaaatagaagaagaagg  
tggagagagacagagacagatccattcgttagtgaaacggtatctgacggtatcgccgaattcacaatggcagttatccacaattttaaagaaaag  
ggggattgggggtacagtcaggggaaagaatagtagacataatgcaacagacatacaaaactaaagaattacaaaaaatacaaaaattcaaaa  
atlttcgggttattacagggacagcagagatccagtttggactaggatcctttaccactccctatcagtgatagagaaaagtgaagtcgagtttaccactccctat  
cagtgatagagaaaagtgaagtcgagtttaccactccctatcagtgatagagaaaagtgaagtcgagtttaccactccctatcagtgatagagaaaagtga  
aagtcgagtttaccactccctatcagtgatagagaaaagtgaagtcgagtttaccactccctatcagtgatagagaaaagtgaagtcgagtttaccactccct  
atcagtgatagagaaaagtgaagtcgagtcggtaccgggtcgaggtaggcgtgtacggtgggagcctatataagcagagctcgtttagtgaaccgtca  
gatcgctggagacgcatccacgctgtttgacctccatagaagacaccgggaccgatccagcctccgcccgaactagtcaggtgtggggaattctgc  
agatatcaACAAGTTTGTACAAAAAAGCAGGCTgccaccatggtagcaagggcgaggataacatggccatcatcaaggagttcatgc  
gcttcaaggtgcacatggagggtccgtgaacggccacgagttcgagatcgagggcgagggcgagggcgcccctacgagggcaccagaccgccaag  
ctgaaggtgaccaaggggtggcccctgcccctcgctgggacatcctgtcccctcagttcatgtacggctcaaggcctacgtgaagcaccggcgcacatccc  
cgactacttgaagctgtccttccccgagggctcaagtgaggcgcgtgatgaactcgaggacggcggcgtggtagccgtgaccagggactcctcctgcag  
gacggcgagttcatctacaaggtgaagctgcgcccaccaactcccctccgacggcccgtaatgcagaagaagaccatgggctgggagggcctcctccga  
gcggtgtaccggagggcggcctgaagggcgagatcaagcagaggtgaagctgaaggacggcggccactacgacgctgaggtcaagaccact  
acaaggccaagaagcccgtcagctcccggcgctacaacgtcaacatcaagttggacatcacctcccacaacgaggactacaccatcgtggaacagta  
cgaacggcggcggaggggcggcactccacggcggcagtgacagctgtacaagtccggactcAGATCTCGAGGGATGGCTTTAGAGATC  
CACATGTCAGACCCCATGTGCCTCATCGAGAACTTTAATGAGCAGCTGAAGGTTAATCAGGAAGCTTTGGAG  
ATCCTGTCTGCCATTACGCAACCTGTAGTTGTGGTAGCGATTGTGGCCTCTATCGCACTGGCAAATCCTAC  
CTGATGAACAAGCTGGCTGGGAAGAACAAGGGCTTCTCTGTTGCATCTACGGTGCAGTCTCACACCAAGGG  
AATTTGGATATGGTGTGTGCCTCATCCCAACTGGCCAAATCACACATTAGTTCTGCTTGACACCGAGGGCCT  
GGGAGATGTAGAGAAGGCTGACAACAAGAATGATATCCAGATCTTTGCACTGGCACTTTACTGAGCAGCCT  
CTTTGTGTACAATACTGTGAACAAAATTGATCAGGGTGTCTATCGACCTACTGCACAATGTGACAGAAGTGCAG  
GACTGTCTCAAGGCAAGAACTCACCCGACCTTGACAGGGTTGAAGATCCTGCTGACTCTGCGAGCTTCTTC  
CCAGACTTAGTGTGGACTCTGAGAGATTTCTGCTTAGGCCTGGAAATAGATGGGCAACTTGTACACCAGAT  
GAATACCTGGAGAATTCCTAAGGCCAAAGCAAGGTAGTGATCAAAGAGTTCAAATTTCAATTTGCCCGTC  
TGTGTATACAGAAGTTCTTTCCAAAAAGAAATGCTTTATCTTTGACTTACCTGCTCACCAAAAAAGCTTGCC  
CAACTTGAAACACTGCCTGATGATGAGCTAGAGCCTGAATTTGTGCAACAAGTGACAGAATTCTGTTCTTACA  
TCTTTAGCCATTCTATGACCAAGACTCTCCAGGTGGCATCATGGTCAATGGATCTCGTCTAAAGAACCTGGT  
GCTGACCTATGTCAATGCCATCAGCAGTGGGGATCTGCCTTGCATAGAGAATGCAGTCTGGCCTTGGCTCA  
GAGAGAGAACTCAGCTGCAGTGCAAAAGGCCATTGCCACTATGACCAGCAAATGGGCCAGAAAGTGCAGC  
TGCCCATGGAACCCCTCCAGGAGCTGCTGGACCTGCACAGGACCAGTGAGAGGGAGGCCATTGAAGTCTTC  
ATGAAAACTCTTTCAAGGATGTAGACCAAAGTTTCCAGAAAGAATTGGAGACTCTACTAGATGCAAAACAGA  
ATGACATTTGTAACGGAACCTGGAAGCATCCTCGGATTATTGCTCGGCTTTACTTAAGGATATTTTTGTCC  
TCTAGAAGAAGCAGTGAAGCAGGGAATTTATTCTAAGCCAGGAGGCCATAATCTCTTATTAGAAAACAGAA  
GAACTGAAGGCAAAGTACTATCGGGAGCCTCGGAAAGGAATACAGGCTGAAGAAGTTCTGCAGAAATATTTA  
AAGTCCAAGGAGTCTGTGAGTCATGCAATATTACAGACTGACCAGGCTCTCACAGAGACGgaaaaaagaagaaa  
gAGGCACAAGTGAAAGCAGAAGCTGAAAAGGCTGAAGCGCAAAGGTTGGCGGCGATTCAAAGGCAGAACGA  
GCAAATGATGCAGGAGAGGGAGAGACTCCATCAGGAACAAGTGAGACAAATGGAGATAGCCAAACAAAATT  
GGCTGGCAGAGCAACAGAAAATGCAGGAACAACAGATGCAGGAACAGGCTGCACAGCTCAGCACAAACATTC  
CAAGCTCAAAATAGAAGCCTTCTCAGTGAGCTCCAGCACGCCAGAGGACTGTTAATAACGATGATCCATGT  
GTTTTACTCtaaGACCCAGCTTTCTTGTAACAAGtggttgataccagcagagtgccggcctcagagtgtagggcccggctcgaat  
accatacagcgtcccagactacgcttagtaataaataagaaattctaccgggtaggggagggcgttttccaaggcagctcggagtaaccaccc  
aagatctggcctccgcccgggtttggcgctcccggggcgccccctcctcacggcgagcgtgccacgtcagacgaagggcgagcagcgtcctgat  
ccttccgcccggacgctcaggacagcggcccgtgctcataagactcggccttagaaccccagatcagcagaaggacattttaggacgggacttgggtgact  
ctagggcactggtttcttccagagagcggaaacagggcagggaaaagtagtccctctcggcgattctcggagggatcctcgtgggagcgtgaacggcagta  
ttataaggacgcccgggtgtggcacagctagttccgtcgcagccgggatttgggtcgcggttctgtttgtgagctgctgtatcacttggtagtagcggg  
ctgctgggctggccgggttctgtggccggggcgcctcgggtgggacggaagcgtgtggagagaccgcaagggtctagctgggtccgaggaag  
ttgcctgaaactgggttggggggagcgcagcaaaatggcggctgttccgagtcggaagcagcgttgagggcgttgagggctgtgaggtcgttgaacaa  
ggtgggggagctgtggggcggcaagaaccaaggcttgaggccttcgtaaatcgggaaagctcttattcgggtgagatgggctgggaccatctgggga  
ccctgacgtgaagttgtcactgactggagaactcgggttctgctgttgcggggcgagcttatggcgggtccgttgggacgtgacccgtacccttgggagcg  
cgccgctcgtcgtgctgacgtcaccggttctgttggctataatgcaggggtggggccacctcgggtagggtgctgaggttctcctcgtcgcagagcag  
ggttccggcctagggtaggtctcctgaatcagacaggcggcggacctcgtgtgaggggagggataagtgaggcgtcagtttcttggcgggtttatgtacctatctt  
cttaagtagctgaagctccgggtttgaactatgcgctcggggttggcagtggttttgaagtttttaggcacctttgaaatgtaatcatttgggtcaatatgtaattt

cagtgttagactagtaaatgtccgctaattctggcgttttggctttttgtagacgaagcttggtaccgagctcggtatccaccccgtagcggctctgcagctg  
aatcaccatgtctagactggacaagagcaagtcataaacggagctctggaattactcaatgggtgcggtatcgaaggcctgacgacaaggaactcgtca  
aaagctgggagttgagcagcctaccctgtactggcagctgaagaacaagcggccctgctcgatgccctgcaatcgagatgctggacagggatcataccca  
cttctgccccctggaaggcagctatggcaagactttctcggaacaacgccaagtcataaccgctgtctcctctcacatcgagcggggctaaagtgcact  
cggcaccgcccacaagagaaacagtcagaaaccctggaatacagctcgcgttctgtcagcaaggcttccctggagacgcactgtacgctctgtcc  
gccgtggccactttacactgggctcgtattggggaacaggagcatcaagtagcaaaagaggaagagacacactaccgattctatgccccact  
ctgagacaagcaattgagctgtcaccggcagggagccgaacctgccttcttccggcctggaactaatcatatgtggcctggagaacagctaaagtgcga  
aagcggcgggcccagcaccgacctgacgattttgacttagacatgctcccagccgatgcccttgacgactttgaccttgatgctgctgctgacgctctgacg  
atfttgacctgacatgctccccggtaactaagtaaggatccgcccggcactagaggaattccgcccctctcccccccccccccaactgactgcccgaag  
ccgcttggataaaggccggtgtcgtttgtctatattttccaccatattgccgttcttggcaatgtgagggcccggaaacctggccctgtctctgacgagcat  
tcttaggggtcttccccctcgcgaaggatgcaaggctgttgaatgctggaaggaagcagttcctctggaagcttctgaaacaaacagctctgtagcg  
acccttgcagcagcggaaacccccacctggcagcaggtgctctcgcggcaaaagccacgtgataagatacacctgcaaggcggcacaacccccagt  
gccacgtgtgagttggatagttgtggaagagtcfaatgctctcctcaagcgtattcaacaaggggctgaaggatgccagaaggtacccattgtatgggat  
ctgatctggggcctcgtgacatgctttacatgttttagctgaggttaaaaaacgtctaggcccccgaccacgggagctggtttcttgaaaaacacg  
atgataagctaccggtccaccatgattgaacaagatggattgcacgaggttctccggcctggtgggagaggtattcggctatgactgggcacaacaga  
caatcggctgctctgatcccggttccggctgacgagcagggcgcccgttctttgcaagaccgacctgctgggtgccctgaatgaactgcaagagc  
aggcagcggctatcgtggctggccacgagcggcgcttctcgcagctgtgctgcagctgtcactgaagcgggaagggactggctgctattggcgaagt  
gcccgggagcagctcctgtcatctaccctgctcctgcccagaaagatccatcatgctgatgcaatgcggcggctgcatacgtgatccggctaccctgccc  
ttcgaccaccaagcgaacatcgcatcgagcagcagctactcggatggaagccggtctgtcagatcaggatgatctggacgaagagcatcaggggctcgc  
gccagccgaactgttccagcaggtcaaggcagcatgcccgacggcgaggtatctcgtgacccatggcgtgctgctgcccgaatatcatggtgaaat  
ggcgccttctggattcatgactgtggcggctgggtgtggcgaccgctatcaggacatagcgtggctaccctgatattgctgaagagcttggcggcgaat  
gggtgaccgcttctcgtgctttacggtatcggcctcccgattcgcagcagcatgccttctatgccttctgacgagttctctgatgtacaagtaagcggccg  
gactctagatcataatcagccataccacattgtagaggtttactgtcttaaaaaacctcccacacctccccctgaacctgaaacataaaatgaatgcaattgtg  
ttgttagtccctcccaatcgatacaagcttatcgcgatagatcctaatacactctggattacaaaattgtgaaagattgactggattcttaactatgtctcttt  
acgctatgtggatacgtcttfaatgctttgatcatgctattgctcccgtatggcttctatttctcctctgtataaatcctgggtgctgctctttatgaggagttgtg  
cccgtgtcaggaacgtggcgtggtgtgactgtgttgcagcgaacccccactggttgggacattgccaccacctgacgctcttccgggactttcgtcttcc  
cctcctattgccaggggaactcatcgccgctcctgcccgtgctggacaggggctcggctgttgggactgacaattcctgggtgtgctggggaaatc  
atcgtccttctggctgctcctgtgttgcacactggattctgcgcccagcgtccttctgctacgctcctcggccctaatccagcggacctcctcccggcct  
gctcgggctcgcggccttccgcttccgcttccgcttccgctcagacgagctggatcctccttggcgcctcccgcctcctgagatcctttaaagaccaatgactac  
aaggcagctgtagatcttagccacttttaaaagaaaagggggactggaagggtaattcactcccaacgaagacaagatgctctttgtctgtactggctct  
ctggttagaccagatcagcctggagctctctgctaactagggaaccactgctaagcctcaataaagcttgcctgagtgctcaagtgtgtgtgcccgtc  
tgtgtgtgactctgtaactagatccctcagacccttttagtcagtggtgaaatctctagcagtagtagtcatgtcatctattattcagattttataacttgcaag  
aatgaatatcagagagtgagaggcccgggttaattaaggaaagggctagatcattctgaaagacgaaggccctcgtgatacgcctattttataggttaatgtc  
atgataataatggttcttagacgctagggtggcacttttccgggaaatgtgcgcggaaccctattgttttttaataacattcaaatatgatccgctcatgagac  
aataacctgataaatgctcaataatattgaaaaaggaagatgatgattcaacattccgctgcccctattcccttttgcggcattttgcctcctgttttgcctc  
accagaaaacgctggtgaaagtaaaagatgctgaagatcagttgggtgacagagtggtttacatgcaactggatcctcaacagcggtaagatcctgagagttt  
cgccccgaagaacgtttccaatgatgagcacttttaagttctgctatgtggcgggtattatcccggttgacgcccgggcaagagcaactcggctcgcgcatac  
actattctcagaatgacttgggtgagtaactaccagtcacagaaaagcatctacggatggatgacagtaagagaattatgagtgctgccataaccatgagtg  
ataacactcggccaactacttctgacaacgatcggaggaccgaaggagctaaccgctttttgacaacatgggggatcatgtaactcgccttgatgcttggg  
aaccggagctgaatgaagccataccaaacgacgagcgtgacaccacgatcctgtagcaatggcaacaacgttgcgcaaaactattaactggcgaactactt  
actctagctcccggcaacaattaatagactggatggaggcggataaagttgcaggaccacttctgcgctcggccctccggctggctggtttattgctgataaatc  
tggagccggtgagcgtgggtctcgcggtatcattgcagcactggggccagatggaagccctcccgtatcgtagtatctacacgagcggggagtcaggcaacta  
tggatgaacgaaatagacagatcgcgtgagataggtgcctcactgattaagcattgtaactgacagcaagttactcatatatactttagattgattaaaactc  
atfttaattaaaaggatctagggaagatccttttgataatctcatgacaaaatcccttaacgtgagtttctgctcactgagcgtcagaccccgtagaaaagatc  
aaaggatcttctgagatccttttctcgcgtaatctgctgcttgcacaacaaaaaacaccgctaccagcgggtggttgttggcgatcaagagctaccaact  
cttttccgaaggtaactggctcagcagagcgcagataccaaatactgttctctagttagccgttagtgccaccactcaagaactctgtagcaccgctac  
atacctcgtctgtaactcctgttaccagtggtgctgcccagtgccgataagtcgtgcttaccgggttggactcaagacgatagttaccggataaggcgcagcgg  
tcgggctgaacggggggtcgtgcacacagcccagcttgagcgaacgacctacaccgaactgagatacctacagcgtgagctatgagaaagcgcaccgct  
tcccgaagggagaaaggcggacaggtatccgtaagcggcagggctcgaacaggagagcgcagagggagctccaggggaaacgctggtatcttta  
tagtctgtcgggttccacactgactgagcgtgattttgtatgctcgtcagggggcggagcctatggaaaaacgccagcaacgcggccttttaccggt  
cctggccttttgcgcttctcacaatgcttctcctcgtatcccctgattctgtgataaccgtattaccgcttggagtgactgataccgctcgcgcagccga  
acgaccgagcgcagcagtcagtgagcaggaagcgggaagagcgcaccaatacgaacccgctcctcccgcggttggccgattcattaatgagcaag  
ctcatggtgactaatttttattatgacagagccgagggcctcggcctgagctattccagaagttagtgaggagccttttggaggccttaggcttttgcaaa  
aagctcccgtggcagcagaggttcccagctggaagcggcagtgagcgcacagcaatattgtgagttagctcactattaggcaacccccagccttactact  
ttatgctcccgtcgtatggtgtggaattgtgagcggataacaaattcacacaggaacagctatgacatgattacgaattcacaaaataaagcatttttactg  
cattctagttgtggttgcacaaactcatcaatgtatctatctgtgtaactggataacagctaaccaaaatcatcccaactcccaccataccctat  
taccactgccaattactgtggttcttactctaaacctgtatcctctgaatttttcaaaagaaattgtattgttaaatatgtactacaaacttagtagt

>plInducer-mCherry-GBP1-R48A

cgagtgggttacatcgaactggatcacaacagcggaagatccttgagagtttgcggcgaagaacgtttccaatgatgagcactttaaagttctgctatgtggc  
gcggtattatcccgtgtgacgcccggcaagagcaactcggcgcgcacatactattctcagaatgacttgggtgagctaccagtcacagaaaagcatctt  
acggatggcatgacagtaagagaattatgacgtgctgccataacctgagtgataacactcggccaacttactctgacaacgatcggaggaccgaaggag  
ctaaccgctttttgcacaacatgggggatcatgtaactcgcctgatcgttgggaaccggagctgaatgaagccataccaaacgacgagcgtgacaccacgat  
gctgtagcaatggcaacaacgttgcgcaaaactaactggcgaacttactctagcttccggcacaataatagactggatggaggcggataaagttgc  
aggaccactctgcgctcggcctccggctggctggttattgctgataaaactcggagcgggtgagcgtgggtctcgcggtatcattgacgactggggccagat  
ggtaagccctcccgtatcgtatctacacgacggggagtcaggcaactatggatgaacgaaatagacagatcgcctgagataggtgacctactgattaagc  
attgtaactgtcagaccaagttactcataataactttagattgattaaaactcatttttaattaaaaggatctaggtgaagatccttttgataatctcatgaccaa  
atccctaacgtgagtttctgaccctgagcgcagaccccgtagaaaagatcaaaggatctcttgagatcctttttctgcgctgaatctgctgctgcaaa  
aaaaccaccgctaccagcgggtgttggcgggatcaagagctaccaactcctttccgaaggtaactggctcagcagagcgcagataccaaactgttctt  
tagtgtagccgtagttaggccaccactcaagaactctgtagcaccgctacatacctcgtctgtaactcctgttaccagtggtgctgcccagtgccgataagtcg  
tgtctaccgggttgactcaagacgatagttaccggataaggcgcagcggctcgggctgaacggggggtcgtgacacagcccagctggagcgaacgacc  
tacaccgaactgagatacctacagcgtgagctatgagaaagcgcacgcttccgaaggagaaaggcggacaggtatccggtaagcggcagggctgga  
acaggagagcgcacgagggagctccaggggaaacgcctggtatctttatagctcgtgctgggttccgacactctgactgagcgtgattttgtgatgctcgc  
agggggcggagcctatgaaaaacgccagcaacgcgcttttaccggttctggccttttctgacatgttcttctcgttaccctgattctgt  
ggataaccgtattaccgctttagtgagctgataccgctcggcagccgaacgaccgagcgcagcagctcagtgagcgggaagcgggaagagcgcgcca  
atagcaaacccgctcctcccgcgcttggcggattcattatgacgaagctcatggtgactaattttttatattatgacagggcggaggccgctcggcctctg  
agctattccagaagtagtgaggaggcttttggaggcctaggctttgcaaaaagctcccgtggcagcagaggttcccgactggaaagcgggagtgagc  
caacgcaatattgtgagttagctcactcaataggcaccaccaggctttacactttatgctccggctcgtatgtgtggaattgtgagcggataacaatttcacaca  
ggaaacagctatgacatgattacgaatttcaaaaataaagcatttttctcagctatttagttgtggttgcacaaactcaatgatacttcatgctggtcaact  
ggataactcaagtaacaaaatcatccaaactcccaccataccttaccactgccaattaccctgtggttcttactctaaactgtgattcctctgaatta  
tttcttttaagaaattgtattgttaaatatgtactcaaaacttagttagttggaaggcctaatcactccaaagaagacaagataccttgatctgtggatctacca  
cacacaaggctactccctgattagcagaactacacaccaggccagggtcagatatacactgaccttggatggtgctacaagctagtagaccgtgagccag  
ataaggtagaagaggccaataaaggagagaacaccagctgttacaccctgtgagcctgcatgggatggatgacccggagagagaaggttagagtgagg  
gtttgacagccgctagcattcatcagctggcccagagcgtcaccggagcttcaagaactgctgatacagcgtgctacaagggacttccgctggggac  
ttccaggaggcgtggcctggcgggactggggagtgccgagccctcagatcctgcatataagcagctgcttttgctgtactgggtctctcgtgtagaccag  
atctgagcctggagctctcgttaactagggaaaccactgcttaagcctcaataaagcttgccttgagtgctcaagtagtgtgcccgtctgtgtgactctg  
gtaactagagatccctcagaccctttatgctagtggtgaaaatctctagcagtgccgcccgaacagggactgaaagcgaagggaaaccagaggagctctc  
cagcgcaggactcggcttctgaagcgcacggcaagaggcaggggagggcggcagctggtgagtagcgcacaaaattttgactagcggaggctagaaggag  
agagatgggtgagagcgtcagtaattaagcggggagaattagatcgcgtggaaaaaactcggtaaggggaaagaaataataaataa  
aacatatagtatggcgaagcagggactagaacgattcgcagttatcctggcctgttagaacaacatcagaaggctgtagacaaaactctgggacagctcaac  
catccctcagacaggatcagaagaacttagatcattataatcacagtagcaaccctctattgtgtgcatcaaaggatagagataaaagacaccaaggaagct  
ttagacaagatagaggaagagcaaaaacaaagtaagaccaccgcacagcaagcggccggcgcgctgatctcagacctggaggaggagatagaggac  
aattggagaagtgaaatataataaataaagtagtaaaaattgaaccattaggagtagcaccaccaaggcaagagaagagtggtgagagagaaaaa  
gagcagtggaataggagcttcttctgggttcttgggagcagcaggaagcactatggcgcagcgtcaatgacgctgacggctacaggccagacaattattg  
tctggtatagtcagcagcagaacaattgctgagggtattgaggcgaacagcatctgttgaactcacagctcggggatcaagcagctccaggcaagaat  
cctggctgtggaagatacctaaggatcaacagctcctgggattggggtgctctggaaaactcattgaccactgctgtgcttggatgctagttggagta  
ataaatctctggaacagatttgaatcacacgacctggatggagtgggacagagaaattaacaattacacaagcttaatacactccttaattgaagaatcgcaa  
aaccagcaagaaaagaatgaacaagaattattggaattagataaattgggcaagtttgggaattggttaacataacaaattggctgtggtatataaaattatcat  
aatgatagtaggagctggttaggttaagaatagttttgctgacttctatagtgatagagtaggacgggatattcaccattatcgttccagaccacctccaa  
ccccgaggggaccgacaggccgaaggaatagaagaagaaggtggagagagacagagacagatccattcagattgtaacggatctcgcagcgtat  
cgccgaattcacaatggcagttatccacaattttaaagaaaaggggggattgggggtacagtgacggggaagaatagtagacataatagcaaca  
gacatacaaaactaaagaattacaaaaacaaattacaaaaattcaaaatttccgggttattacagggacagcagagatccagtttgactaggtatccttaccact  
ccctatcagtgatagagaaaagtgaagtcgagttaccactccctatcagtgatagagaaaagtgaagtcgagttaccactccctatcagtgatagagaaa  
agtgaagtcgagttaccactccctatcagtgatagagaaaagtgaagtcgagttaccactccctatcagtgatagagaaaagtgaagtcgagttaccac  
tccctatcagtgatagagaaaagtgaagtcgagttaccactccctatcagtgatagagaaaagtgaagtcgagctcggatcccgggtcaggttaggctgt  
acggtgggaggcctatataagcagagctcgttagtgaaaccgctcagatcgcctggagacgcatccacgctgtttgacctccatagaagacaccgggaccga  
tccagcctccgcccggccgaactagctcagtggtggaattctgcagatatacaACAAGTTGTACAAAAAAGCAGGCTgccaccatgggtgag  
caagggcagggaggataacatggccatcatcaaggagttcatgcgctcaaggtgcacatggagggtccgtgaacggccacgagttcagatcgagggc  
gagggcaggggcccctacgagggcaccagaccgcaagctgaaggtgaccaaggggtggccccctgcccctgcgctgggacatcctgtcccctcagtt  
catgtacggctcaagggctacgtgaagcaccggcgcacatcccgactactgaagctgcttcccaggggttcaagtgaggcgcgctgatgaacttcg  
aggacggcggcgtggtgacgtgacccaggactcctcctcagcagcggcaggttcatctacaaggtgaagctgcgcccgaaccaactcccctccgacggc  
cccgtatgcagaagaagactgggctgggaggtcctcctccgagcggatgtaccccagggcggcgcctgaagggcagatcaagcagaggtgaa  
gctgaagcagcggcaccactacgctcaggtcaagaccactcaagggccaagggccgctgacgtgcccggcgcctacaacgtcaacatcaagtt  
ggacatcacctcccacaacagggactacaccatcgtggaaacagtagcaacggcgaagggcggccactccaccggcggcagtgagcagctgtaacgct  
cggactcAGATCTATGGCATCAGAGATCCACATGACAGGCCAATGTGCCTCATTGAGAACACTAATGGGCGAC  
TGATGGCGAATCCAGAAGCTCTGAAGATCCTTTCTGCCATTACACAGCCTATGGTGGTGGTGGCAATTGTGG  
GCCTCTACGCACAGGCAAATCCTACCTGATGAACAAGCTGGCTGGAAAGAAAAAGGGCTTCTCTCTGGGCT  
CCACGGTGCAGTCTCACACTAAAGGAATCTGGATGTGGTGTGTGCCACACCAAGAAGCCAGGCCACATC

CTAGTTCTGCTGGACACCGAGGGTCTGGGAGATGTAGAGAAGGGTGACAACCAGAATGACTCCTGGATCTT  
CGCCCTGGCCGTCTCCTGAGCAGCACCTTCGTGTACAATAGCATAGGAACCATCAACCAGCAGGCTATGG  
ACCAACTGTACTATGTGACAGAGCTGACACATAGAATCCGATCAAATCCTCACCTGATGAGAATGAGAATGA  
GGTTGAGGATTCAGCTGACTTTGTGAGCTTCTTCCCAGACTTTGTGTGGACACTGAGAGATTTCTCCCTGGA  
CTTGGAAGCAGATGGACAACCCCTCACACCAGATGAGTACCTGACATACTCCCTGAAGCTGAAGAAAGGTAC  
CAGTCAAAAAGATGAACTTTTTAACCTGCCAGACTCTGTATCCGAAATTCTTCCCAAAGAAAAAATGCTTT  
GTCTTTGATCGGCCGTTACCAGCAGGAAGCTTGCCAGCTCGAGAACTACAAGATGAAGAGCTGGACCC  
CGAATTTGTGCAACAAGTAGCAGACTTCTGTTCTACATCTTTAGTAATCCAAAACCTAAAACCTTTTCAGGAG  
GCATCCAGGTCAACGGGCTCGTCTAGAGAGCCTGGTGTGACCTACGTCAATGCCATCAGCAGTGGGGAT  
CTGCCGTGCATGGAGAACGCAGTCTGGCCTTGCCAGATAGAGAACTCAGCTGCAGTGCAAAAGGCTAT  
TGCCACTATGAACAGCAGATGGGCCAGAAGGTGCAGCTGCCACAGAAAGCCTCCAGGAGCTGCTGGACC  
TGCACAGGGACAGTGAAGAGAGGCCATTGAAGTCTTTCATCAGGAGTTCCTTCAAAGATGTGGACCATCTAT  
TTCAAAGGAGTTAGCGGCCAGCTAGAAAAAAGCGGGATGACTTTTGTAAACAGAATCAGGAAGCATCAT  
CAGATCGTTGCTCAGGTTTACTTCAGGTCAATTTTCAGTCTCTAGAAGAAGAAGTGAAGGCGGGAATTTATTC  
GAAACCAGGGGGCTATCGTCTCTTTGTTGAGAAGCTACAAGACCTGAAGAAAAAGTACTATGAGGAACCGAG  
GAAGGGGATACAGGCTGAAGAGATTCTGCAGACATACTTGAATCCAAGGAGTCTATGACTGATGCAATTCT  
CCAGACAGACCAGACTCTCACAGAAAAAGAAAAGGAGATTGAAGTGAACGTGTGAAAGCTGAGTCTGCACA  
GGCTTCAGCAAAAATGTTGCAGGAAATGCAAAGAAAGAATGAGCAGATGATGGAACAGAAGGAGAGGAGTTA  
TCAGGAACACTTGAACAACCTGACTGAGAAGATGGAGAACGACAGGGTCCAGTTGCTGAAAGAGCAAGAGA  
GGACCTCGCTCTTAACTTCAGGAACAGGAGCAACTACTAAAAGAGGGATTTCAAAAAGAAAGCAGAATAAT  
GAAAAATGAGATACAGGATCTCCAGACGAAAATGAGACgacgaaaggcatgtaccataagctaaGACCCAGCTTTCTTG  
TACAAAGtggtgatatccagcacagtggcgccgctcagctctagagggcccgggttgaataccatacagctcccagactacgcttagtaatgatta  
attaaactagaaattctaccggtaggggagggcgttttcccaaggcagctctggagtaaccacccaagatctggcctccgcgccgggtttggcgctcccgc  
ggcgccccctcctcacggcgagcgtgccacgtcagacgaagggcgagcgagcgtcctgatcctccgcccggagcctcaggacagcggcccgcctgc  
tcataagactcggccttagaaccccagatcagcagaaggacatttaggacgggacttgggtgactctagggcactggtttcttccagagagcggaaacaggg  
gaggaaaagttagcttctcggcgttctcgggagggatctccgtggggcgtgaacgccgatgattatataaggacgcgcccgggtggtggcacagctagtcc  
gtcgcagccgggatttgggtcgcggcttctgttggatcgtgtgatcgtcacttggtagtagcgggctgctgggctggcggggcttctggtggcggccggcc  
gctcgggtgggacggaagcgtgtggagagaccgccaagggctgtagctgggtccgagcaaggttgcctgaactgggggtggggggagcgcagcaaa  
atggcggctgttcccagcttgaatggaagacgcttgtgaggcgggctgtgaggtcgttgaacaaggtgggggcatggtggcgcaagaaccaaggt  
cttagggcctcgttaatcgggaaagctcttattcgggtgagatgggctggggcaccatctgggaccctgacgtgaagttgtcactgactggagaactcgggt  
tgtcgtctgtcggggcgccagttatggcggtgcccgtggcagtgaccctgaccttgggagcgcgcccctcgtgctgctgacgtcaccgctctgtg  
ctataatgacgggtggggccacctgcccgttaggtgtgcggtaggcttttccctgcgcaggacgcaggggtcggcctagggttagctctcctaagtcgacagg  
cgccggacctctggtgaggggaggataagtgaggcgtcagtttcttggcggtttatgtacctatcttctaagtagctgaagctccggtttgaactatgcgctg  
gggtggcgagtggttttgaagtttttagccacctttgaaatgtaatacttgggtcaatgtaattttagtgtagactagtaaattgcccgttaaattctggcgt  
tttggctttttgtagacgaagcttggtagcagctcggatctccaccctgaccggtcctgacgtcgaattcaccatgcttagactggacaagagcaaaagtcata  
aacggagctctggaattactcaatggtgtcggatcgaaggcctgacgacaaggaaactcgtcctcaaaagctgggagttgagcagcctaccctgactggcacg  
tgaagaacaagcgggcccctgctgatccctgccaatcgagatgctggacaggtatcataccactctgccccctggaaggcagctatggcaagactttct  
gcggaacaacgcaagtcataccgctgtgctctcctctcacatcgcgacgggctaaagtcatctcggcaccgcccacagagaaacagctacgaaacc  
tggaaaatcagctcggcttctgtgacgaaggcttctcctggagaacgcactgtacgctctgcccgggtgggacccttactggtgctgtattggagga  
acaggagcatcaagtagcaaaagaggaagagagacacactaccacgattctatgccccacttctgagacaagcaattgagctgtgacccggcagggga  
gccgaacctgcttcttctggcctggaactaatcatatgtggcctggagaacagctaaagtgcgaagcggcgggccgaccgacgccctgacgatttga  
cttagacatgctcccagccgatgccctgacgactttagcttgcctgctgacgctcttgcgattttagcttgcacatgctccccgggtaactaagtaag  
gatccgcgccgactagaggaattccgcccctccccccccccccctaacgttactggccgaagccgcttgaataaggccgggtgtgcttctatgatgt  
atttccacatattgcccgttttggcaatgtgagggcccggaaacctggccctgcttctgacgagcattcctaggggtcttccccctcgcctcaaaaggaatgcaa  
ggtctgtgaatgctgtaaggaagcagttcctctggaagcttctgaagacaacaacgtctgtagcagacccttgcaggcagcggaaacccccacctggcga  
caggtgctctcggccaaaagccacgtgtataagataccctgaaaggcggcacaaccccagtgccacgttgtgagttggatagttgtgaaagagtgtaa  
atggctctcctaagcgtattcaacaaggggctgaaggatgccagaaggtaccccattgtatgggatctgatctggggcctcgggtgacatgctttacatgtgtt  
agtcgaggttaaaaaacgtctaggccccccgaaccacggggacgtggttttcttgaaaaaacagatgataagcttaccggtccacatgattgaacaagat  
ggattgacgcaggttctcggccgcttgggtggagaggctattcggctatgactgggcacaacagacaatcggctgctgatgcccgggttccggctgtca  
gcgagggggcggccggcttcttgaagaccgacctgcccgtgcccgaatgaactgcaagacgagcagcggctatcgtggtggccacgacgggc  
gttcttgcgagctgtgctgcagctgtcactgaagcgggaaggactggtctattggcgaaagtcggggcaggtatcctctgcatctcacctgtcctgc  
cgagaaagtatccatcaggtgatgcaatcggcggtgcatacctgatccggctacctgccattcgaccaccaagcgaacatcgatcgagcagc  
acgtactcggatggaagccggtctgtcagatcaggatgatctggacgaagagatcaggggctcgcgcccagccgaactgtcggcaggctcaaggcagcag  
gcccgagcggcaggtatcgtcgtgacccatggcagctgctgctgcaaatctggtgaaatggccgctttctgattcctgactgctgtggtggcggctgggt  
tggcgagaccgctatcaggacatagcgttggctaccctgatttgcgaagacttggcgccgaatggcgtgaccgcttctcgttctttagctatcggctcgcgctc  
ccgattcgcagcgcacgcttctatcgcctcttgcagagttctctgtatgtaagtaaagcggcggcactctagatcataatcagccataccacattgtagag  
gtttactgctttaaaccctcccacacctcccctgaacctgaaacataaaatgaatgcaattgttgtttagtccctcccaattcgatataagcttatcggat  
agatcctaataacacctggtatcaaaaattgtgaaagattgactggtattcttaactatgttctctttacgctatgtggatacgtgctttaatgctttagatcgc  
tattgctcccgtatggcttcttctcctctgtataaatcctgggtgctgctctttagaggagttgtggccggtgtcaggcaacgtggcgtggtgtgactgtgtt

ctgacgcaacccccactggtggggcattgccaccacctgtcagctccttccgggactttcgcttccccctccctattgccacggcggaactcatcgccgctgc  
ctgcccgcgtgacaggggctcggctggtgggactgacaattccggtggtgctcgggaaatcatgctccttctggctgctcgcctggtgacacctgga  
ttctgcgcgagcgtccttctgctacgtccttccggccctcaatccagcggacctccttcccgcgctgctcggcctctgccccttccgcttctgctcctg  
ccctcagacgagtcggtatccttctggccgctccccgctgagatcctttaaagaccaatgacttacaaggcagctgtagatcttagccactttttaaagaaa  
aggggggactggaaggctaaactcctcaacgaagacaagatctgcttctgctgactgggtctctggttagaccagatctgagcctgggagctctctggc  
taactagggaaacccactgctaaagcctcaataaagcttgccttgaagcttcaagtagtgtgctcctgctgcaagaaatgaatatcagagagtgagaggcccggttaatt  
tttagtcagtgaggaaatctctagcagtagttagctatcttattcagtagtattataacttgcacaaagaaatgaatatcagagagtgagaggcccggttaatt  
aaggaaaggctagatcattctgaagacgaaaggcctcgtgatacgcctattttataggtaattgcatgataataatggttcttagacgtcagggtggcactttt  
cgggaaatgtgcggaacccctattgttttttctaaatacattcaaatatgtatccgctcatgagacaataaccctgataaatgctcaataatattgaaaaa  
ggaagagtatgagattcaacattccgctgcccctattccctttttgcggaatttgccttctgcttttctcaccagaaacgctggtgaaagtaaaagatgctga  
agatcagttgggtgca

>plInducer-mCherry-GBP1-3R

cgagtggttaccatgaactggtatcaacagcggtaagatcctgagagtttgcggcgaagaacggtttccaatgatgagcactttaaagttctgctatgtggc  
gctgtattatcccgtgtgacgcccggcaagagcaactcggctcgcacatacactattctcagaatgacttgggtgagtagtaccagtcacagaaaagcatctt  
acggatggcatgacagtaagagaattatgacgtgctccataaccatgagtgataacactcggccaacttactctgacaacgatcggaggaccgaaggag  
ctaaccgctttttgcacaacatgggggatcatgtaactcgccttgccttgccttgggaaccggagctgaatgaagccatacacaacgacgagcgtgacaccacgat  
gcctgtagcaatggcaacaacggttgcgcaactattaactggcgaactacttactctagcttccggcacaataatagactggatggaggcggataaagttgc  
aggaccacttctgctcggccctcggctggtggttattgctgataaactggagccggtgagcgtgggtctcgcggtatcattgcagcactggggccagat  
ggttaagccctccgctatcgtatctacacgacggggagtcaggcaactatggatgaacgaaatagacagatcgcgtgagatagggtcctcactgattaaagc  
attgtaactgtcagaccaagttactcatataactttagattgatttaaaactcatttttaattaaaaggatctaggtaagatccttttgataatctcatgacaaa  
atcccttaacgtgagtttcttccactgagcgtcagaccccgtagaaaagatcaaaggatctctgagatcctttttctgcgctaatctgctgcttcaaaacaa  
aaaaccaccgctaccagcgggtgttggctcgggatcaagagctaccaactctttccgaaggtaactggctcagcagagcgcagatacacaactgcttctt  
tagttagccgtgtagttagccaccactcaagaactctgtagaccgctacatacctcgtctgtaactcctgttaccagtggtgctgcccagtgccgataagtcg  
tgtctaccgggttgactcaagacgatagttaccggataaggcgcagcggctcgggtgaacggggggtctgctgacacagcccagctggagcgaacgacc  
tacaccgaactgagatacctacagcgtgagctatgagaaagcgcacgctcccgaaggagaaaggcggacaggtatccggtaagcggcagggctgga  
acaggagagcgcacgaggagctccaggggaaacgctggtatctttagctctgctggttccgcaactctgactgagcgtcagattttgtgagctcgtc  
agggggcggagcctatgaaaaacgcgcaacgcgcttttaccggttctggccttttctgctcactgttcttctgctgattccccctgattctgt  
ggataaccgtattaccgctttagtgagctgataccgctcgcgcagccgaacgaccgagcgcagcagtgagcagagcgaagcgaagcgaagcgcacca  
atcagcaaacggcctcctcccgcttggcggcattcattagcagaagctcagcagcagcagcagcagcagcagcagcagcagcagcagcagcagcagcagc  
agctattccagaagtagtgaggagccttttggaggcctaggcttttgcacaaagcctcccggtgcaacgacaggtttcccgactggaagcgggagcgtgagc  
caacgcaataatgtgagtttagctcactcattaggcaccaccaggctttacactttatgcttccggctcgtatgtgtggaattgtgagcggataacaatttcacaca  
ggaaacagctatgacatgattacgaatttcacaaataaagcatttttctcactgatttctagttgtggttctcacaactcatcaatgtatcttcatgctggatcaact  
ggataactcaagctaaccaaaatcatcccaactcccaccataaccctattaccactgccaattaccctgtggttcttactctaaacctgtgattcctctgaatta  
tttcttttaagaaattgtattgttaaatatgtactacaaacttagttagtggaggcctaattcactccaaagaagacaagatattctgctggtgattacca  
cacacaaggctactccctgattagcagaactacacaccaggccagggtcagatattcactgaccttggatggtgctacaagctagtagtaccagttgagccag  
ataaggtagaagaggccaataaaggagagaacaccagctgttacaccctgtgagcctgcatgggatggatgaccgggagagagaaggttagagtgagg  
gtttgacagccgctagcattcatcagtgcccgagagctgcatccggagtagtcaagaactgctgatatcagcgtgctacaagggacttccgctggggac  
ttccaggaggcgtgctggcgggactggggagtgccgagccctcagatcctgcatataagcagctgcttttgcctgactgggtctctggttagaccag  
atctgagcctgggagctctctggttaactaggaaccactgcttaagcctcaataaagcttgcctttagtgctcaagtagtgtgctcccgtctgtgtgactctg  
gtaactagagatccctcagacccttttagctagtgtaaatacttagcagtgccgcccgaacagggactgaaagcgaagggaaaccagaggagctctct  
cgacgcaggactcggcttctgaagcgcacggcaagaggcagggcggcagctggtgagtagccaaaaattttagctagcggaggctagaaggag  
agagatgggtgagagcgtcagtaataagcggggagaattagatcgcgatgggaaaaaattcggtaaggccagggggaagaaaaataataaataa  
aacatatagtatgggcaagcaggagctagaacgattcgcagtaattcctggcctgttagaaacatcagaaggctgtagacaaactgggacagctacaac  
catccctcagacaggatcagaagaacttagatcattataataacagtagcaaccctctattgtgtgcatcaaggatagagataaaagacaccaaggaagct  
ttagacaagatagaggaagagcaaaacaaaagtaagaccaccgcacagcaagcggccggcggctgatctcagacctggaggaggagatagagggac  
aattggagaagtgaaatataataaagtagtaaaatgaaccattaggagtagcaccaccaaggcaagagaagagtggtgagagagaaaaa  
gagcagtggaataggagcttcttctgggttctgggagcagcaggaagcactatgggcgagcgtcaatgacgctgacggtagcaggccagacaattattg  
tctggtatagtcagcagcagaacaatttctgagggctattgaggcgaacagcatctgttgaactcagactcggggcatcaagcagctccaggcaagaat  
cctggctgtgaaagatacctaaggatcaacagctcctgggatttgggtgctctggaaaactcattgcaccactgctgtgccttggatgctagttggagta  
ataaatctctggaacagatttgaatcacacgacctggatggagtgagcagagaaattaacaattacacaagcttaatacactccttaattgaagaatcga  
aaccagcaagaaaagaatgaacaagaattattggaattagataaattggcgaagtttgggaattggttaacataacaattggctgtggtatataaaatattcat  
aatgtagtaggagcctggttaggttaagaatagttttgctgacttctatagtagtaagagtaggacgggatattcaccattatcgttccagaccacccca  
ccccgagggaccagcagggcccgaaggaatagaagaagggtggagagagacagacagatccattcagattagtagcagcagctcgcagcgtat  
cccgaattcacaattggcagtagtattcacaattttaaagaaaaagggggttgggggttacagtgacggggaagaaatagtagacataatagcaaca  
gacatacaactaaagattacaaaaacaaattcaaaaaattcaaaatttccgggtttattacaggggacagcagagatccagtttggactaggatcctttaccct  
ccctatcagtgatagagaaaagtgaagtcgagttaccactccctatcagtgatagagaaaagtgaagtcgagttaccactccctatcagtgatagagaaa  
agtgaagtcgagttaccactccctatcagtgatagagaaaagtgaagtcgagttaccactccctatcagtgatagagaaaagtgaagtcgagttaccac  
tccctatcagtgatagagaaaagtgaagtcgagttaccactccctatcagtgatagagaaaagtgaagtcgagctcggtaaccgggtcagggtaggctgt

acggtgggaggcctatataagcagagctcgttagtgaaccgtcagatcgctggagagccatccacgctgtttgacctccatagaagacccgggaccga  
tcacgctccgcgcccccgaactagctcagtggtggaattctgcagatatcaACAAGTTTGTACAAAAAAGCAGGCTgccaccatggtgag  
caagggcgaggaggataacatggccatcatcaaggagttcatgcgttcaaggtgcacatggagggtcctggaacggccacgagttcgagatcgagggc  
gagggcgagggccgcccctacgagggcaccagaccgcaagctgaaggtgaccaagggggcccccctgacctcgctgggacatcctgtcccctcagtt  
catgtacggctcaagggcctacgtgaagcaccggccgacatccccgactactgagctgtccttccccgagggctcaagtgggagcgctgtgacttcg  
aggacggcggtggtgaccgtgaccaggtcctcctgcaggacggcgagttcatctacaaggtgaagctgacggcgcccaacttcccctcgacggc  
cccgtaatgcagaagaagaccatggctgggagggcctcctccgagcggatgtaccccgagggcgcctgaagggcgagatcaagcagaggtgaa  
gctgaaggacggcgccactacgacgtgaggtcaagaccacctaagggcaagaagcccgtgacgtgcccggcgctacaacgtcaacatcaagtt  
ggacatcacctcccacaacgaggactacaccatcgtggaacagtaacgcgcggagggcgccactccaccggcggtgagcagctgtacaagtc  
cggactcAGATCTATGGCATCAGAGATCCACATGACAGGCCAATGTGCCTCATTGAGAACACTAATGGGCGAC  
TGATGGCGAATCCAGAAGCTCTGAAGATCCTTTCTGCCATTACACAGCCTATGGTGGTGGTGGCAATTGTGG  
GCCTCTACCGCACAGGCAAATCCTACCTGATGAACAAGCTGGCTGAAAGAAAAAGGGCTTCTCTCTGGGCT  
CCACGGTGCAGTCTCACACTAAAGGAATCTGGATGTGGTGTGTGCCACACCAAGAAGCCAGGCCACATC  
CTAGTTCTGCTGGACACCGAGGGTCTGGGAGATGTAGAGAAGGGTGACAACCAGAATGACTCCTGGATCTT  
CGCCCTGGCCGTCTCCTGAGCAGCACCTTCGTGTACAATAGCATAGGAACCATCAACCAGCAGGCTATGG  
ACCAACTGTACTATGTGACAGAGCTGACACATAGAATCCGATCAAATCCTCACCTGATGAGAATGAGAATGA  
GGTTGAGGATTCAGCTGACTTTGTGAGCTTCTCCAGACTTTGTGTGGACACTGAGAGATTTCTCCCTGGA  
CTTGAAGCAGATGGACAACCCCTCACACCAGATGAGTACCTGACATACTCCCTGAAGCTGAAGAAAGGTAC  
CAGTCAAAAAGATGAAACTTTTAACTGCCCAGACTCTGTATCCGAAATTCTTCCCAAAGAAAAAATGCTTT  
GTCTTTGATCGGCCCGTTCACCGCAGGAAGCTTGCCCAGCTCGAGAAACTACAAGATGAAGAGCTGGACCC  
CGAATTTGTGCAACAAGTAGCAGACTTCTGTTCTACATCTTTAGTAATCCAAAATAAACTCTTTTCAAGGAG  
GCATCCAGGTCAACGGGCCTCGTCTAGAGAGCCTGGTGTGACCTACGTCAATGCCATCAGCAGTGGGGAT  
CTGCCGTGCATGGAGAACGCAGTCTGGCCTTGCCCGAGATAGAGAACTCAGCTGCAGTGCAAAAGGCTAT  
TGCCCACTATGAACAGCAGATGGGCCAGAAGGTGCAGCTGCCACAGAAAGCCTCCAGGAGCTGCTGGACC  
TGCACAGGGACAGTGAAGAGAGAGGCCATTGAAGTCTTCATCAGGAGTTCCTTCAAAGATGTGGACCATCTAT  
TTCAAAGGAGTTAGCGGCCAGCTAGAAAAAAGCGGGATGACTTTTGTAAACAGAATCAGGAAGCATCAT  
CAGATCGTTGCTCAGTCTTACTTCAGTCAATTTTCACTCTAGAAAGAAGTGAAGCGGGGAATTTATTC  
GAAACCAGGGGGCTATCGTCTCTTTGTTGCAAGCTACAAGACTGAAGAAAAAGTACTATGAGGAACCCAG  
GAAGGGGATACAGGCTGAAGAGATTCTGCAGACATACTTGAATCCAAGGAGTCTATGACTGATGCAATTCT  
CCAGACAGACCAGACTCTCACAGAAAAAGAAAAGGAGATTGAAGTGGAACGTGTGAAAGCTGAGTCTGCACA  
GGCTTCAAGCAAAAATGTTGCAGGAAATGCAAAGAAAGAATGAGCAGATGATGGAACAGAAGGAGAGGAGTTA  
TCAGGAACACTTGAACAACACTGACTGAGAAGATGGAGAACGACAGGGTCCAGTTGCTGAAAGAGCAAGAGA  
GGACCCCTCGCTCTTAACTTCAGGAACAGGAGCAACTACTAAAAGAGGGATTTCAAAGAAAGCAGAATAAT  
GAAAAATGAGATACAGGATCTCCAGACGAAAATGGCAGCaGCaagggcatgtaccataagctaaGACCCAGCTTTCTT  
GTACAAAGtggtgatattccagcacagtgccggcgctcagctctagagggcccgggtcgaataccatacagcgtccagactacgcttagtaatgat  
taattaaactagaaattctaccgggtaggggagggcgcttttccaaggcagctctggagtaaccacccaagatctggcctccgcccggggtttggcgctcccg  
cgggcccctcctcacggcgagcgtgccacgtcagacgaagggcgagcagcgtcctgatcctccgcccggagcgtcaggacagcggcccgtg  
ctcataagactcggccttagaaccacagatcagcagaaggacatttaggacgggacttgggtgactctagggcactggtttcttccagagagcggaaacagg  
cgagaaaagtagtccctctcggcgattctcgggagggatcctcggggcggtgaacgcccgatgattatataaggacgcgcccgggtgtggcacagctagttc  
cgtcgcagccgggatttgggtcgcggttcttgggtgatcgtgactgctgagtagcgggtgctgggctggccggggcttctggtccgcccgggc  
cgctcgggtgggacggaagcgtgtggagagaccgcaagggctgtagctgggtccgagcaaggttgcctgaactgggggtggggggagcgcagcaa  
aatggcggctgtcccagcttgaatggaagacgcttggaggcggctgtgaggtcgtgaaacaaggtgggggcatggtggcggaagaaccaag  
gtcttgaggcctcgctaagcgggaaagcttattcgggtgagatgggctggggcaccatctggggaccctgacgtgaagttgtcactgactggagaactcg  
gttgtcgtctgttggggggcggcagttatggcgggtgccgttggcagtgacccgtaccttgggagcgcgcccctcgtcgtgctgacgtcaccggttctgtt  
ggctataatgcagggtggggccacctgcccgttaggtgtgcccgttaggcttttctccgtcgcaggacgcagggttcgggcctagggtagctcctcgaatcgaca  
ggcgccggacctctggtgaggggagggataagtgaggcgtcagtttcttggctgggtttatgtacctatcttctaagtagctgaagctccgggtttgaaactatgcgt  
cggggttggcagtggttttgaagtttttaggcacctttgaaatgtaatcatttgggtcaatatgtaattttagttagactagtaaatgtccgctaaattctggc  
cgttttggcttttttagacgaagcttggtaccgagctcggatctccacccgtaaccggtcctgcagctgaattcaccatgtctagactggacaagagcaaagtc  
ataaacggagctctggaattactcaatggtgtcggatcgaaggcctgacgacaaggaaactcgtcaaaaagctgggagttgagcagcctaccctgtactggc  
acgtgaagaacaagcgggcccctgctcagatgccctgccaatcgagatgctggacaggtcataaccactctgccccctggaaggcgagtcagtggaagact  
ttctcggaaacaacgcaagtcataaccgctgtgctcctctcacatcgcgacgggctaaagtcatctcggcaccgcccacagagaaacagtagcaaa  
ccctgaaaatcagctcggcttctgtgacgaaggtctcctcggagaacgcactgtacgctctgtccgcccgtggccactttactggtgctgattgga  
ggaacaggagcatcaagtagcaaaagaggaaagagagacacctaccaccagaaactatgccccactctgagacaagcaattgagctgttcgaccggcag  
ggagccgaactgctcctttcggcctggaactaatcatatgtggcctggagaacagctgaaagcgaagcggcgccagcagcgccttgcagattt  
tacttagacatgctccagccgatgcccctgacgactttgacctgtatgctgctgacgtctgtgacgattttgacctgacatgctccccgggttaactaag  
aaggatccgcccgcactagaggaattccgccccctccccccccccccctaacgttactggccgaagccgcttgaataaggccggtgtgcttctata  
tgtattttccaccatattgcccgttttggcaatgtgagggcccggaaacctggccctgtcttctgacgagcattcttaggggtcttccccctcgcgcaaaaggaatg  
caaggtctgtgaatgtcgtgaaggaagcagttccttggagcttctgaaagcaaaacaacgtctgtagcgacccttgcaggcagcggaaacccccacctgg  
cgacaggtgctctgcccgaaaagccacgtgtataagataccctgcaaggcggcacaacccccagtgccacgttgtgagttggatagttgtgaaagagt



caaatggctctcctcaagcgtattcaacaaggggctgaaggatgccagaaggtacccattgtatgggatctgatctggggcctcggcgcacatgctttacatgt  
gtttagtgcagggttaaaaaaacgcttaggccccccgaaccacggggacgtggttttctttgaaaaacacgatgataagcttaccgggtccaccatgattgaacaa  
gatggattgcacgcaggttcccgccgctgggtggagaggctattcggctatgactgggcacaacagacaatcggtctctgatgccgctgttccggctg  
tcagcgcagggcgccgggttctttgtcaagaccgacctgtccggctgaatgaactgcaagacgagcagcggctatcgtgctggccacgacgg  
gcttccctgcgcagctgtctgcagctgactgaagcgggaagggactggctgctattggcggaagtgcggggcaggatctctgtcatctcaccttgcct  
gccgagaagtatccatcatggctgatgcaatgcggcggctgcatacgcctgacccgctaccattcgaccaccaagcgaacctgcacatcgacgagcga  
gcacgtactcggatggaagccggtctgtgatcaggatgatctggacgaagagcatcaggggctcgcgccagccgaactgttcgccaggctcaagcgag  
catgccccgagcggagatctcgtcgtgacccatggcgtatgctgctgctgccaatatcatggtgaaaaatggccgcttttctggattcatcactgtgcccggctg  
gggtggcggaccgctatcaggacatagcgttggctaccctgtatattgtgaagagctggcggcgaatgggctgaccgcttctcgtgctttaccggtatcgcc  
ctcccgaatgcagcgcacgtctctatcgccttctgacgagttctctgtatgtacaagtaaagcggccgactctagatcataatcagccataccacattgta  
gaggttttactgtcttaaaaaacctcccacacctcccctgaacctgaacataaaaatgaatgcaattgttgttttagtccctcccaattcgatataagcttatcg  
cgatagatcctaatacaacctctggattacaaaattgtgaagattgactggattcttaactatgttgccttttaccgctatgtggatacgtgctttaaagccttggatc  
atgctattgctcccgatggctttctctcctgtataaatcctggtgctgctctttatgaggagttgtggccgtgtcaggcaactggtgctgtgactgt  
gtttgctgacgaacccccactggttggggcattgccaccacctgctcagctcttccgggacttctgcttccccctccctattgccacggcggaactcatgcgcg  
ctgcttggccgctgctggacaggggctcggctgtgggactgacaattcgggtgtgctgggaaatcatgctcttctggctgctgcctgtgttgcacc  
tgattctgcggggacgtccttctgctacgtccttccgcccataacagcggacctcctcccggcctgctgcccggctctgcccgtcttccgcttccg  
ttcgcctcagacgagctggatctcccttggccgctccccgctgagatccttaagaccaatgacttacaaggcagctgtagatcttagccacttttaaaag  
aaaaggggggactggaagggctaattcactcccaagacaagatctgcttttctgtactgggtctctctggttagaccagatctgagcctgggagctctct  
ggctaactagggaaaccactgcttaagcctaataaagcttgcctgagtgctcaagtagtgtgcccgtctgtgtgactctggaactagagatccctcaga  
cccttttagtcagtggtgaaaatctctagcagtagtagtcatgtatctattcagatattataacttgcaagaaatgaatacagagagtgagagggcccggtt  
aattaaggaaagggtagatcattctgaagcgaagggcctcgtgatacgcctattttatagggtaatgtcatgataataatggttcttagacgtcaggtgga  
cttttcggggaaatgtgcgcggaaccctattgtttattttcctaatacattcaaatatgtatccgctcatgagacaataaccctgataaatgctcaataatattgaa  
aaaggaagagtagatgattcaacatttccgtgctgccttattcccttttgcggcatttgccttctgttttgcaccaccagaacgctggtgaaagtaaagatg  
ctgaagatcagttgggtgca

>pInducer-mCherry-GBP1-C589A

cgagtgggttacatcgaactggatcacaacagcggaagatccttgagagtttgcgcccaagaacggtttccaatgatgagcactttaaagtctgctatgtggc  
gcggtattatcccgtgtgacgcgggcaagagcaactcggctcgcacatacactattctcagaatgactgttgtagtaccagctcacagaaaagcatctt  
acggatggatgacagtaagagaattatgcatgctgcccataacctgagtgataacactcggccaacttactctgacaacgatcggagggaccgaagag  
ctaaccgctttttgcacaacatgggggactgtaactcgcctgtatcgttgggaactcggagctgaatgaagccaatacacaacgacgagcgtgacaccacgat  
gcctgtagcaatggcaacaacggttgcgcaaaactattaactggcaactacttactctgactcctccggcaacaataatagactggatggagcgggataaagtgc  
aggaccactctgcgctcggccctcgggctggctggttattgtctgataaatctggagccggtgagcgtgggtctcgcggtatcattgcagcactggggccagat  
ggtaagccctcccgtatcgtatctacacgacggggagtcaggcaactatggatgaacgaaatagacagatcgcgtgagatagggtccctcactgattaagc  
attgtaactgtcagaccaagtttactcataatactttagattgattaaaactcatttttaaaaggatctaggtaagatccttttgataatctcatgacaaa  
atcccctaactgtagttttcgttccactgagcgtcagaccccgtagaaaagatcaaggatcttctgagatcctttttctgcgcgtaactctgctgcttcaaa  
aaaaccaccgctaccagcgggtggtttgttgcggatcaagagctaccaactcttttccgaaggtaactgctcagcagagcgcagatacacaactgcttct  
tagttagcctgtagttaggccaccactcaagaactctgtagcaccgcctacatacctcgtctgtaaatcctgttaccagtggtgctgctccagtgccgataagtcg  
tgtctaccgggttgactcaagacgatagttaccggataagggcgcagcgtcgggtgaaacggggggtctgtgacacagcccagctggagcgaacgacc  
tacaccgaactgagatacctacagcgtgagctatgagaagcgcacgctcccgaaggagaaagggcggacaggtatccggtgaagcggcagggctcga  
acaggagagcgcacgagggagctccaggggaaacgctggtatctttatagctcctgctcgggttccgacctgactgagcgtcgattttgtgatgctcgtc  
agggggcggagcctatgaaaaacgccaagcagcggccttttaccggtcctgctgcttttgccttttgcacatgtcttctcgttatcccctgattctgt  
ggataaccgtattaccgctttagtgagctgataccgctcggcagccgaacgaccgagcgcagcagtcagtgagcgggaagcgggaagagcgcacca  
atagcacaaccgctcctcccgcgctgtggcgattcattatgcaagcctatgctgactaattttttatattatgagagccgaggccgctcggcctctg  
agctattccagaagttagtgaggaggctttttggaggcctaggctttgcaaaaagctcccgtggcagcagcaggtttcccactggaagcgggagtgagc  
caacgcaataatgtgagttagctcactcattaggcaccaccaggctttacactttatgcttccggtcgtatgtgtggaattgtgagcgggataacaattcaca  
ggaaacagctatgacatgattacgaattcacaataaagcatttttctactgattctagttgtggtttgccaactcatcaatgtatctatcatgctggatcaact  
ggataactcaagctaaccaaaatcatcccacactcccaccataccctattaccactgccaattaccctgtggttcttactctaaacctgtgattcctctgaatta  
ttttattttaaagaaattgtattgtaaatatgtactacaaacttagttagttggaagggtcaattcactcccagaagacaagataccttctgatctggtgatctacca  
cacacaaggctactccctgattagcagaactacacaccaggccaggggtcagatatacactgacctttggatggtgctacaagctagtagcagttgagccag  
ataaggtagaagaggcaataaaggagagaacaccagctgttacacctgtgagcctgcatgggatggatgacccggagagagaagtgttagagtgag  
gtttgacagccgctagcattcatcagtgcccgagagctgacccggacttcaagaactgctgatatcagcctgctacaagggacttccgctggggac  
ttccagggagcgtgctggtggcgggactggggagtgccgagccctcagatcctgcatataagcagctgcttttgcctgtactgggtctctcgtttagaccag  
atctgagcctgggactctctggttaactaggaacccactgtaagcctaataaagcctgagctgagtgctcaagtagtgtgcccgtctgttgtgactctg  
gtactgagatcctcagacccttttagctagtggtgaaaactctgagctggtggcggcgaacagggactggaagcgaagggaaaccagagggactctct  
gacgcagcagactcggctgtcgaagcgcgacggcgaagagcggagggcggcagctggtgagtagcgaacaaattttagctagcggagctagaaggag  
agagatgggtgcgagagcgtcagtttaagcgggggagaattagatcgcgatgggaaaaaattcggttaaggccaggggggaaagaaaaataaattaa  
aacatatagtatgggcaagcagggagctagaacgattcgcagttatcctggcctgttagaaacatcagaaggctgtagacaaactgggacagctacaac  
catcccctcagacaggtacagaagaacttagatcattatataatacagtagcaaccctctattgtgtgcatcaaggatagagataaaagacaccaaggaagct  
ttagacaagatagaggaagagcaaaacaaaagtaagaccaccgcacagcaagcggccggcctgatctcagacctggaggaggagataggggac

aattggagaagtgaattatataaataaagtagtaaaaattgaaccattaggagtagcaccaccaaggcaagagaagagtggtgcagagagaaaaa  
gagcagtggggaataggagctttgttcttgggttcttgggagcagcaggaagcactatgggcgcagcgtcaatgacgctgacggtagcagccagacaattattg  
tctggtatagtgacagcagacaatttctgtagggctattgagcgcacacagcatctgttgaactcacagctcggggcatcaagcagctccaggcaagaat  
cctggctgtgaaagatacctaaggatcaacagctcctgggatttgggtgtcttggaaactcatttgcaccactgtctgaccttgaatgctagttggagta  
ataaatctctggaacagatttgaatcacacgacctggatggagtgaggacagaaaattaacaattacacaagcttaatacactccttaattgaagaatcgcaa  
aacagcaagaaaaagaatgaacaagaattattggaattagataaatgggcaagtttggtaattggtttaacatacaaaattgctgtggtatataaaattatcat  
aatgatagtaggagcctgtgtaggttaagaatagtttctgtacttctatagtagaattagtagtaggagggatattaccattatcgtttcagaccacccctccaa  
ccccgaggggacccgacagggcccgaaggaatagaagaagaaggtggagagagacagagacagatccattcagattgaaacggatctcgacggat  
cgccgaattcacaatggcagttatccacaattttaaagaaaaagggggattgggggtacagtgacgggaaagaatagtagacataatagcaaca  
gacatacaactaaagaattacaaaaacaaattacaaaaattcaaaatttctgggtttattacagggacagcagagatccagtttggactaggatcctttaccact  
ccctatcagtgatagagaaaagtgaagtcgagtttaccactccctatcagtgatagagaaaagtgaagtcgagtttaccactccctatcagtgatagagaaa  
agtgaagtcgagtttaccactccctatcagtgatagagaaaagtgaagtcgagtttaccactccctatcagtgatagagaaaagtgaagtcgagtttaccac  
tccctatcagtgatagagaaaagtgaagtcgagtttaccactccctatcagtgatagagaaaagtgaagtcgagctcggtaccgggctgaggttaggctgt  
acgggtgggagggcctatataagcagagctcgttagtgaaaccgctagatcgctggagacgcatccacgctgtttgacctcctagaagacaccgggaccga  
tccagcctccgcccgaactagtcagtggtggaattctgcagatatcaACAAGTTTGTACAAAAAAGCAGGCTgccaccatggtgag  
caagggcgaggaggataacatggccatcatcaaggagttcatgcgctcaaggtgcacatggagggctccgtgaacggccacgagttcgagatcgagggc  
gagggcgagggccgcccctacgagggcaccagaccgccaagctgaaggtgaccaaggggtggccccctgccctcgcctgggacatcctgtcccctcagtt  
catgtacggctcaagggctacgtgaagcaccgcccgcacatccccgactactgaagctgtcctccccgagggctcaagtgaggagcgcgtgatgaactcg  
aggacggcggcgtggtgaccgtgaccaggactcctccctgcaggacggcaggttcatctacaaggtgaagctgcgcggcaccactcccctccgacggc  
cccgtatgcaagaagaacatgggctgggagggcctcccgagcggatgacccgaggacggcgcctgaagggcgagatcaagcagagggctgaa  
gtgaaggacggcggcactacgacgctgaggtcaagaccactacaaggccaagaagcccgtagctgccggcgctacaacgtcaacatcaagtt  
ggacatcacctcccacaacgaggactacaccatcgtggaacagtagcaacgcgcccagggcgccactccaccggcggtatggacgagctgtacaagtc  
cggactcAGATCTATGGCATCAGAGATCCACATGACAGGCCAATGTGCCTCATTGAGAACACTAATGGGCGAC  
TGATGGCGAATCCAGAAGCTCTGAAGATCCTTTCTGCCATTACACAGCCTATGGTGGTGGTGGCAATTGTGG  
GCCTCTACCGCACAGGCAAACTCTACCTGATGAACAAGCTGGCTGGAAGAAAAAGGGCTTCTCTCTGGGCT  
CCACGGTGCAGTCTCACACTAAAGGAATCTGGATGTGGTGTGTGCCACCCCAAGAAGCCAGGCCACATC  
CTAGTTCTGCTGGACACCGAGGGTCTGGGAGATGTAGAGAAGGGGTGACAACCAGAATGACTCCTGGATCTT  
CGCCCTGGCCGTCTCTGAGCAGCACCCTCTGTGTACAATAGCATAGGAACCATCAACCAGCAGGCTATGG  
ACCAACTGTACTATGTGACAGAGCTGACACATAGAATCCGATCAAATCCTCACCTGATGAGAATGAGAATGA  
GTTGAGGATTCAGCTGACTTTGTGAGCTTCTTCCCAGACTTTGTGTGGACACTGAGAGATTTCTCCCTGGA  
CTTGAAGCAGATGGACAACCCCTCACACCAGATGAGTACCTGACATACTCCCTGAAGCTGAAGAAAGGTAC  
CAGTCAAAAAGATGAAACTTTTAACTGCCCAGACTCTGTATCCGGAATTTCTTCCAAAGAAAAAATGCTTT  
GTCTTTGATCGGCCCGTTACCCGCAGGAAGCTTGGCCAGCTCGAGAACTACAAGATGAAGAGCTGGACCC  
CGAATTTGTGCAACAAGTAGCAGACTTCTGTTCTACATCTTTAGTAATCCAAAACATAAACTCTTTTCCAGGAG  
GCATCCAGGTCAACGGGCTCTGCTAGAGAGCCTGGTGTGCTGACCTACGTCAATGCCATCAGCAGTGGGGAT  
CTGCCGTGCATGGAGAACGCAGTCTGGCCTTGGCCAGATAGAGAACTCAGCTGCAGTGCAAAAGGCTAT  
TGCCCACTATGAACAGCAGATGGGCCAGAAGGTGCAGCTGCCACAGAAAGCCTCCAGGAGCTGCTGGACC  
TGCACAGGGACAGTGAAGAGAGAGGCCATTGAAGTCTTTCATCAGGAGTTCTTCAAAGATGTGGACCATCTAT  
TTCAAAAGGAGTTAGCGGCCAGCTAGAAAAAAGCGGGATGACTTTTGTAAACAGAATCAGGAAGCATCAT  
CAGATCGTTGCTCAGGTTTACTTACGTTTCTTCTAGTCTCTAGAAGAAGAAGTGAAGGCGGGAATTTATTC  
GAAACCAGGGGGCTATCGTCTCTTTGTTTCAAGACTACAAGACCTGAAGAAAAAGTACTATGAGGAACCGAG  
GAAGGGGATACAGGCTGAAGAGATTCTGCAGACATACTTGAATCCAAGGAGTCTATGACTGATGCAATTCT  
CCAGACAGACCAGACTCTCACAGAAAAAGAAAAGGAGATTGAAGTGAACGTGTGAAAGCTGAGTCTGCACA  
GGCTTACGCAAAAATGTTGCAGGAAATGCAAAGAAAAGAATGAGCAGATGATGGAACAGAAGGAGAGGAGTTA  
TCAGGAACACTTGAACAACACTGACTGAGAAGATGGAGAACGACAGGGTCCAGTTGCTGAAAGAGCAAGAGA  
GGACCCTCGCTCTTAACTTACAGGAACAGGAGCAACTACTAAAAGAGGGATTTCAAAAAGAAAGCAGAATAAT  
GAAAAATGAGATACAGGATCTCCAGACGAAAATGAGACgacgaaaggcaGctaccataagctaaGACCCAGCTTTCTT  
GTACAAAGtggtgataccagcagagtgccggcgcctcagcttagagggcccgggtcgaataccatacagcgtccagactacgcttagtaatgat  
taattaaactagaaattctaccggtaggggagggcgttttccaaggcagctctggagtaaccacccaagatctggcctccgcccgggttttggcctcccg  
cgggcgccccctcctcacggcagcgtgccacgtcagacgaagggcgacgagcgtcctgatcctccgcccggacgctcaggacagcggcccgcgtg  
ctcataagactcggccttagaaccagatcagcagaaggacattttaggacgggacttgggtgactctagggcactggttttcttccagagagcggaacagg  
cgaggaaaagtagtcccttctcggcagttctcgggagggatcctcgtggggcgtgaacgcccgatgattatataaggacgcccgggtgtggcacagctagttc  
cgtcgcagccgggatttgggtcgcggttcttgggtgatcgtgtagctgtagtggtagtagcagggctgctgggtgcccggggcttctggtggcggcgggc  
cgctcgggtggcagcgaagcgtgtggagagaccgccaagggctgtagtctgggtccgagcaaggttgccctgaactgggggtgggggggagcgcagca  
aatgcccgtgttcccagcttgaatggaagacgcttggagcggctgtgaggtcgttgaacaaggttggggggcagttggggggcgaagaaccaag  
gtcttgaggccttcgctaagcgggaaagcttattcgggtgagatgggctggggcaccatctggggaccctgacgtgaaagttgtcactgactggagaactcg  
gtttgcgtctgttgcggggcgagttatggcgtgcccgttggcagtgacccgtaccttgggagcgcgcccctcgtcgtgctgacgtcaccctgtctgtt  
ggctataatgcaggggtggggccacctgcccgttaggtgtgcccgttaggcttttccctcgcagggacgcaggggtcgggctagggtaggctcctcgaatcgaca  
ggcggccggacctctgtgaggggagggataagtgaggcgtcagtttcttggcgggtttatgtacctatcttcaagtagctgaagctccgggtttgaactatgcgt

cggggtggcgagtgtttgtgaagtttttaggcacctttgaaatgtaatcattgggtcaatatgtaatttcagtgttagactagtaaattgtccgctaaattctggc  
cgttttggcctttttgtagacgaagcttggtagcagctcggatctccaccccgtagccgtcctgcagtcgaattcaccatgtctagactggacaagagcaaagtc  
ataaacggagctctggaattactcaatgggtcggatcgaagcctgacgacaaggaaactcgcctcaaaagctgggagttagcagcctaccctgtactggc  
acgtgaagaacaagcgggcccctgctcgatgccctgccaatcgagatgctggacagggcatcataccactctgccccctggaaggcgagtcatggcaagact  
ttctgcggaacaacgccaagtcataccgctgtgctctcctctcacatcgcgacgggctaaagtgcctcggcaccgcccacagagaacagttacgaaa  
ccctggaaaatcagctcgcgttctctgtcagcaaggcttccctggagaacgcaactgacgctctgccccctgagacaagcaattgagctgtcagccggcag  
ggaacaggaacctgccttctttcgccctggaactaatcatatgtggcctggagaacagctaaagtgcgaaagcggcgggcccagccgacgcccctgacgatt  
tgacttagacatgctcccagccgatgcccctgacgactttgacctgatatgctgctgctgacgctctgacgattttgacctgacatgctccccgggtaactaagt  
aaggatccgcggccgactagaggaattccgcccctctccccccccccccctaacgttactggccgaagccgcttgaataaggccggtgtgctttgtctata  
tgtattttccaccatattgccgtctttggcaatgtgaggccgggaaacctggccctgtcttctgacgagcattcctaggggtcttcccctctcgccaaaggaatg  
caaggtctgtgaatgtcgtgaaggaagcagttcctctggaagcttctgaagacaacaacgctgtgtagcacccttgcaggcagcggaaacccccacctgg  
cgacaggtgctctgcccgaagccacgtgtataagatacacctgcaaaggcggcacaaccccagtgccacgttgtgagttggatagttgtgaaagagt  
caatggctctcctcaagcgtattcaacaaggggctgaaggatgccagaaggtaccccattgatgggatctgatctgggcccctgggtcacatgctttacatgt  
gtttagtcgaggttaaaaaaacgttagccccccgaaccacggggacgtggtttcctttgaaaaacacgatgataagcttaccggtccaccatgattgaacia  
gatggattgcacgaggttccggccgctgggtggagaggctattcggctatgactggcacaacagacaatcggtctctgatccgcccgttccggctg  
tcagcgcagggcgcccgttcttttgaagaccgacctgtccggtccctgaatgaactgcaagacgaggcagcggctatcgtggctggccacgacgg  
gcttctctgagcagctgtctcagcgttgcactgaagcgggaaggactggctgtattggcgaagtgcggggcaggatctcctgtcatctcacctgtcctc  
gcccagaaagtatccatcatggctgatgcaatgcggcggctgcatacgttgcctgacctgcccattcgaccaccaagcgaacatcgcatcgagcga  
gcacgtactcggatggaagccggtctgtcgtacaggtgatctggacgaagagcatcaggggctcgcgcccagccgaactgttcccagggtcaaggcgag  
catgcccagcggcgaggatctcgtcgtgaccatggcgatgctgcttgcgcaatatcatggtggaaaatggccgcttttctggattcatcagactgtggccggctg  
gggtggcggaccgctatcaggacatagcgttggctaccctgtatattgtgaagagcttggcggcgaatgggctgaccgcttctcgtgctttacggtatcgccg  
ctcccattcgcagcgcacgcttctatcgccttctgacgagttcttctgatgtacaagtaaagcggccgagctctagatcataatcagccataaccacattgta  
gaggtttactgtcttaaaaaacctcccacacctccccctgaacctgaaacataaaatgaatgcaattgttgttttagtccctcccattcgatatcaagcttatcg  
cgatagatcctaatcaacctctggattacaaaattgtgaaagattgactggattcttaactatggtctcctttacgctatgtggatacagctgcttfaatgctttgtatc  
atgctattgctcccgtatggcttctctcctctgtataaatcctggtgctgtcttctatgaggagttgtggcccgtgtcaggcaacgtggcgtggtgtgactgt  
gtttgctgacgcaacccccactggttggggcattgccaccacctgtcagctccttccgggacttctgcttccccctccctattgccacggcgggaactcatcgccgc  
ctgcttcccgtgctgacaggggctcggctgttgggactgacaattccgtggtgttgcgggaaatcatgcttcttctggctgctcgcctgtgttgcacc  
tggattctgcgaggacgtccttctgctacgtccctcggccctcaatccagcggaccttcccgccgctgctgcccgtctgcccgtcttccgcttccgcttccg  
ttcgcctcagacgagtcggatcctccttgggcccctccccgctgagatcctttaaagaccaatgacttacaaggcagctgtagatcttagccacttttaaaag  
aaaaggggggactggaaggcctaattcactcccacgaagacaagatctgcttttgccttactgggtctctctggttagaccagatctgagcctgggagctctc  
ggctaactagggaaaccactgcttaagcctcaataaagcttgccttgagtgcttcaagtagtgtgcccgtctgtgtgactctggaactagagatccctcaga  
cccttttagtcagtgtggaaaatctctagcagtagttagtcatcttattcagatattataactgcaaagaaatgaatatcagagagtgagaggcccgggtt  
aattaaggaaagggctagatcattctgaagacgaaaggcctcgtgatacgcctattttatagggtaatgtcatgataataatggttcttagacgtcaggtggca  
ctttcggggaaatgtgcgcggaaccctattgtttattttctaaatacattcaaatatgtatccgctcatgagacaataaccctgataaatgcttcaataatattgaa  
aaaggaagagtagtagtattcaacatttccgtgtcgccttattccctttttgcggcattttgccttctgttttctcaccacagaaacgctggtgaaagtaaaagatg  
ctgaagatcagttgggtgca
